# Supplementary material
Source: PubMed Central journal article supplement (PMC3226722)
Supplement: NIHMS264012-supplement-supp.pdf [file NIHMS264012-supplement-supp.pdf]

### Supplementary Figure: Analysis of invasive array validity

(A) Pair-wise plots comparing log base 2 expression for each General TAM sample compared to one another (left) and each Invasive TAM sample compared to one another (right). Linear-regression line plotted for each comparison, respective correlation coefficients in bottom left boxes for each group. (B) Density histograms for each general TAM sample (left) and invasive TAM sample (right). (C) Chip image for each conducted array comparing invasive TAM (Cy3/green) to general TAM (Cy5/red). Inlaid 3.5x magnification of central control spots. Note overall uniform distribution of experimental probes and coloration of control probes. (D) Composite pair-wise plot comparing overall log base 2 expression of invasive TAMs to general TAMs. Regression line depicted,  $r=0.916$ . (E) MA plot indicating log ratio of general TAMs and invasive TAMs (M) to fluorescence intensity. (F) Generated SAM plots depicting relation of delta value to FDR (left) and delta value to number of called significant transcripts (right). Delta value of 3.859, used for further study, corresponds to 1% FDR and 1457 called significantly regulated genes.

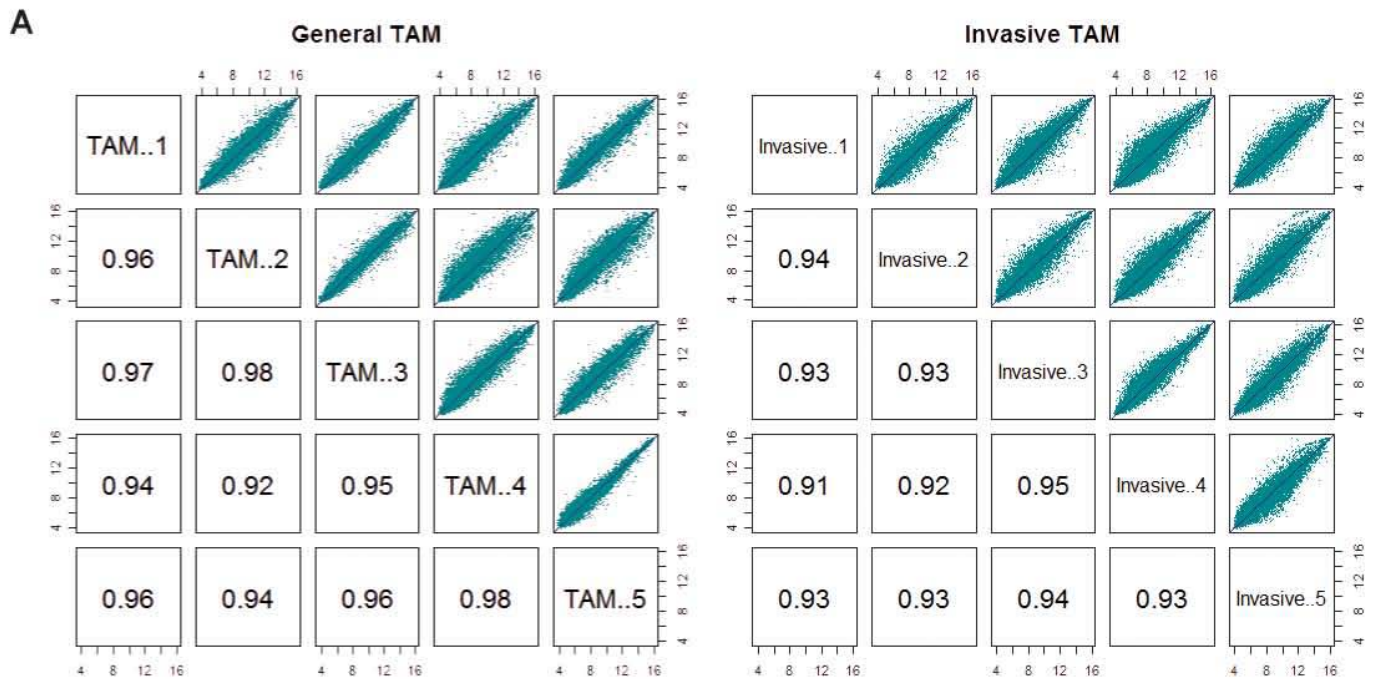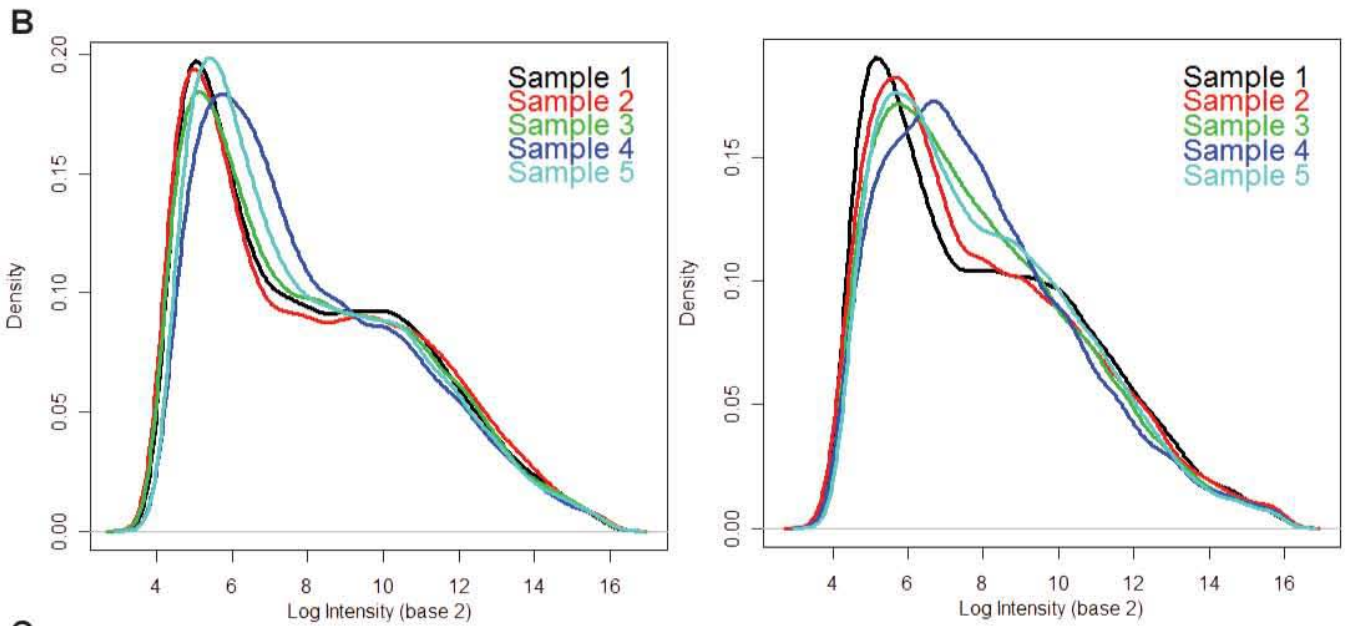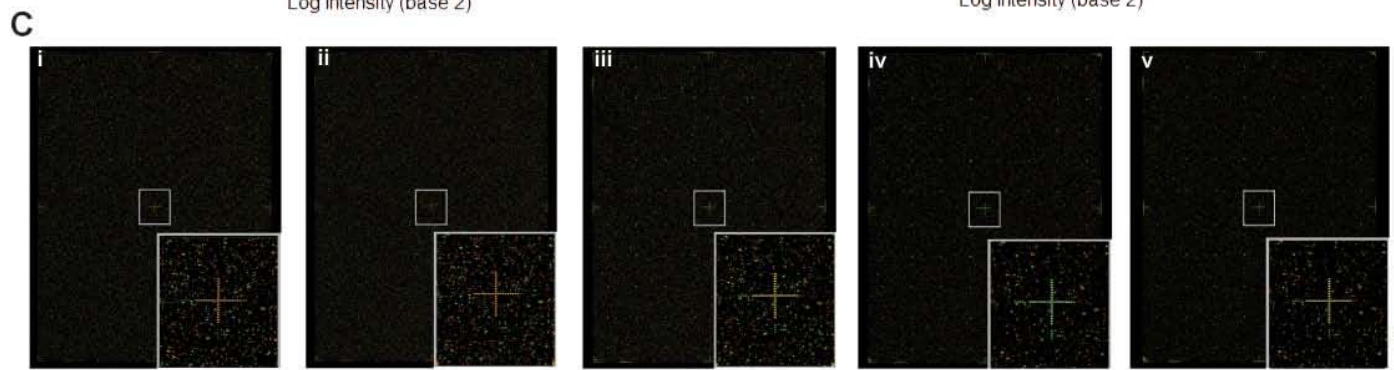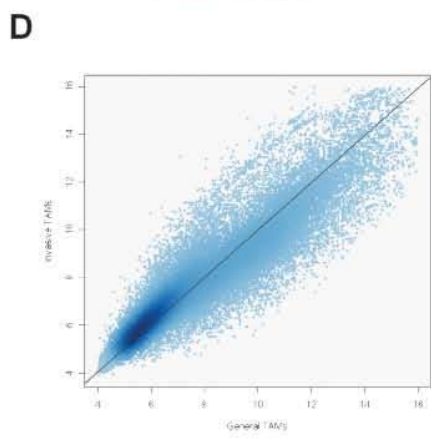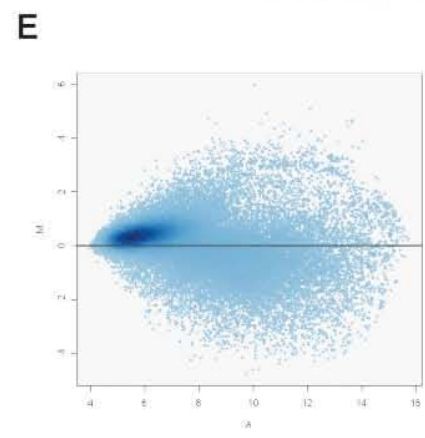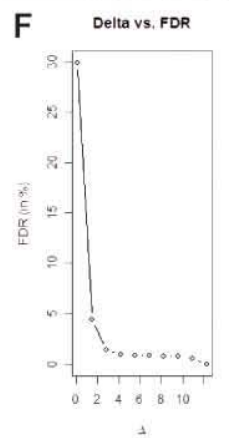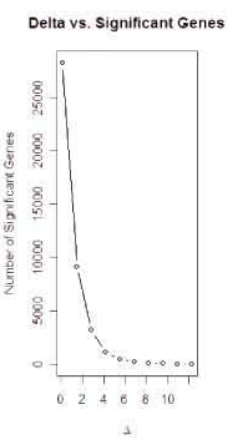

**Supplementary Table: Invasive TAM expression table for significantly (FDR=1%) called transcripts**

| Genbank   | Gene Name                                                                          | Log2Ratio | T-test   |
|-----------|------------------------------------------------------------------------------------|-----------|----------|
| NM_011823 | G PROTEIN-COUPLED RECEPTOR 34                                                      | -4.77242  | 0.001276 |
| AK021044  | G PROTEIN-COUPLED RECEPTOR 34                                                      | -4.63118  | 0.000759 |
| AK079897  | MANNOSE RECEPTOR, C TYPE 1                                                         | -4.6004   | 0.000411 |
| X17501    | CD48 ANTIGEN                                                                       | -4.41636  | 0.001023 |
| NM_008152 | G-PROTEIN COUPLED RECEPTOR 65                                                      | -4.31912  | 0.002659 |
| NM_011539 | THROMBOXANE A SYNTHASE 1, PLATELET                                                 | -4.25924  | 0.000566 |
| L20331    | ADENOSINE A3 RECEPTOR                                                              | -4.25628  | 0.000189 |
| NM_013737 | PHOSPHOLIPASE A2, GROUP VII (PLATELET-ACTIVATING FACTOR ACETYLDIHYDROLASE, PLASMA) | -4.23988  | 0.000168 |
| AF055908  | MULTIDRUG RESISTANT PROTEIN                                                        | -4.2237   | 0.000251 |
| AY255553  | G PROTEIN-COUPLED RECEPTOR 141                                                     | -4.18974  | 0.001821 |
| AK032259  | RING FINGER PROTEIN 180                                                            | -4.17832  | 0.00026  |
| M14277    | FC RECEPTOR, IGG, LOW AFFINITY IIB                                                 | -4.1651   | 0.000836 |
| NM_027571 | PURINERGIC RECEPTOR P2Y, G-PROTEIN COUPLED 12                                      | -4.1343   | 0.002686 |
| NM_009983 | CATHEPSIN D                                                                        | -4.0946   | 0.000828 |
| NM_153197 | C-TYPE LECTIN DOMAIN FAMILY 4, MEMBER A3                                           | -4.0801   | 0.003056 |
| NM_010130 | EGF-LIKE MODULE CONTAINING, MUCIN-LIKE, HORMONE RECEPTOR-LIKE SEQUENCE 1           | -4.06538  | 0.003401 |
| NM_009917 | CHEMOKINE (C-C MOTIF) RECEPTOR 5                                                   | -4.04278  | 0.001088 |
| NM_008855 | PROTEIN KINASE C, BETA 1                                                           | -4.01864  | 0.003217 |
| L20315    | MACROPHAGE EXPRESSED GENE 1                                                        | -4.00828  | 0.000669 |
| BC022752  | SOLUTE CARRIER FAMILY 37 (GLYCEROL-3-PHOSPHATE TRANSPORTER), MEMBER 2              | -3.9758   | 0.000535 |
| AY255606  | EPSTEIN-BARR VIRUS INDUCED GENE 2                                                  | -3.97454  | 0.00142  |
| NM_009370 | TRANSFORMING GROWTH FACTOR, BETA RECEPTOR I                                        | -3.95734  | 0.001766 |
| NM_009890 | CHOLESTEROL 25-HYDROXYLASE                                                         | -3.95148  | 0.00047  |
| NM_029394 | SORTING NEXING 24                                                                  | -3.94424  | 0.001351 |
| AY392766  | LEUKOCYTE-ASSOCIATED IG-LIKE RECEPTOR 1                                            | -3.9176   | 0.004806 |
| BC049256  | MACROPHAGE EXPRESSED GENE 1                                                        | -3.91756  | 0.000854 |
| BC005430  | MANNOSIDASE 2, ALPHA B1                                                            | -3.91296  | 0.002637 |
| NM_028749 | N-ACETYLNEURAMINATE PYRUVATE LYASE                                                 | -3.90154  | 0.000653 |
| Y18463    | CATHEPSIN B                                                                        | -3.901    | 0.000343 |
| AK077187  | COMPLEMENT COMPONENT FACTOR H                                                      | -3.8873   | 0.003278 |
| BC055753  | SESTRIN 1                                                                          | -3.88472  | 0.001999 |
| BC004724  | FIBRONECTIN 1                                                                      | -3.88044  | 0.000182 |
| NM_010422 | HEXOSAMINIDASE B                                                                   | -3.8677   | 0.001562 |
| NM_011055 | PHOSPHODIESTERASE 3B, CGMP-INHIBITED                                               | -3.86056  | 0.000178 |
| BC025535  | FC RECEPTOR, IGG, HIGH AFFINITY I                                                  | -3.85636  | 0.003171 |
| AY392765  | LEUKOCYTE-ASSOCIATED IG-LIKE RECEPTOR 1                                            | -3.85634  | 0.005862 |
| NM_025961 | GLYCINE AMIDINOTRANSFERASE (L-ARGININE:GLYCINE                                     | -3.84622  | 0.001201 |

|           |                                                                                                                                                      |          |          |
|-----------|------------------------------------------------------------------------------------------------------------------------------------------------------|----------|----------|
|           | AMIDINOTRANSFERASE)                                                                                                                                  |          |          |
| NM_177715 | EXPRESSED SEQUENCE AW538430                                                                                                                          | -3.84566 | 0.000531 |
| BC051976  | PROTEIN TYROSINE PHOSPHATASE, RECEPTOR TYPE, O<br>FASCICULATION AND ELONGATION PROTEIN ZETA 2 (ZYGIN<br>II)                                          | -3.84196 | 0.00074  |
| NM_199448 |                                                                                                                                                      | -3.82086 | 0.000188 |
| NM_031195 | MACROPHAGE SCAVENGER RECEPTOR 1                                                                                                                      | -3.80244 | 0.000273 |
| NM_007807 | CYTOCHROME B-245, BETA POLYPEPTIDE                                                                                                                   | -3.78824 | 0.001343 |
| M65027    | GLYCOPROTEIN 49 A                                                                                                                                    | -3.78426 | 0.000513 |
| NM_010421 | HEXOSAMINIDASE A                                                                                                                                     | -3.77754 | 0.001938 |
| NM_011175 | LEGUMAIN                                                                                                                                             | -3.7472  | 0.000771 |
| NM_011693 | VASCULAR CELL ADHESION MOLECULE 1                                                                                                                    | -3.74268 | 0.003425 |
| NM_007406 | ADENYLATE CYCLASE 7                                                                                                                                  | -3.7408  | 0.000139 |
| NM_010368 | BETA-GLUCURONIDASE STRUCTURAL                                                                                                                        | -3.7372  | 0.000376 |
| NM_133792 | LYSOPHOSPHOLIPASE 3                                                                                                                                  | -3.73584 | 0.003541 |
| AY392766  | LEUKOCYTE-ASSOCIATED IG-LIKE RECEPTOR 1                                                                                                              | -3.72844 | 0.006978 |
| AF135166  | PROTEIN TYROSINE PHOSPHATASE, RECEPTOR TYPE, O                                                                                                       | -3.72086 | 0.001921 |
| NM_009155 | SELENOPROTEIN P, PLASMA, 1                                                                                                                           | -3.71102 | 0.0016   |
| NM_021476 | CYSTEINYL LEUKOTRIENE RECEPTOR 1                                                                                                                     | -3.71014 | 0.001904 |
| NM_010233 | FIBRONECTIN 1                                                                                                                                        | -3.70932 | 0.000519 |
| BC025521  | FIBRONECTIN 1                                                                                                                                        | -3.70726 | 0.000336 |
| AK011113  | PLEXIN C1                                                                                                                                            | -3.70392 | 0.000479 |
| NM_013612 | SOLUTE CARRIER FAMILY 11 (PROTON-COUPLED DIVALENT<br>METAL ION TRANSPORTERS), MEMBER 1<br>ATP-BINDING CASSETTE, SUB-FAMILY C (CFTR/MRP),<br>MEMBER 3 | -3.68992 | 0.001557 |
| AK006128  |                                                                                                                                                      | -3.6877  | 0.001719 |
| NM_021334 | INTEGRIN ALPHA X                                                                                                                                     | -3.68648 | 0.002032 |
| AY155439  | RING FINGER PROTEIN 149                                                                                                                              | -3.67818 | 0.000439 |
| BC063258  | PROTEIN TYROSINE PHOSPHATASE, RECEPTOR TYPE, O                                                                                                       | -3.67758 | 0.001221 |
| BC021937  | ALDO-KETO REDUCTASE FAMILY 1, MEMBER C12                                                                                                             | -3.675   | 0.001332 |
| NM_008175 | GRANULIN                                                                                                                                             | -3.66208 | 9.53E-05 |
| NM_183031 | EPSTEIN-BARR VIRUS INDUCED GENE 2                                                                                                                    | -3.65542 | 0.000382 |
| AK043664  | LEUKOCYTE-ASSOCIATED IG-LIKE RECEPTOR 1                                                                                                              | -3.65306 | 0.008084 |
| BC003782  | PHOSPHOLIPID TRANSFER PROTEIN                                                                                                                        | -3.64044 | 0.000477 |
| AK122312  | ZINC FINGER HOMEBOX 1B                                                                                                                               | -3.62944 | 0.001025 |
| BC018363  | SERUM/GLUCOCORTICOID REGULATED KINASE 3                                                                                                              | -3.62738 | 0.000616 |
| NM_013454 | ATP-BINDING CASSETTE, SUB-FAMILY A (ABC1), MEMBER 1                                                                                                  | -3.61892 | 0.002213 |
| NM_138672 | STABILIN 1                                                                                                                                           | -3.61268 | 0.002108 |
| AF440787  | INTERLEUKIN 10 RECEPTOR, BETA                                                                                                                        | -3.6007  | 0.000293 |
| AK036697  | C-TYPE LECTIN DOMAIN FAMILY 5, MEMBER A                                                                                                              | -3.59832 | 0.003029 |
| NM_146037 | POTASSIUM CHANNEL, SUBFAMILY K, MEMBER 13                                                                                                            | -3.59828 | 0.000131 |
| U37465    | PROTEIN TYROSINE PHOSPHATASE, RECEPTOR TYPE, O                                                                                                       | -3.5974  | 0.001414 |
| AB109560  | TRANSMEMBRANE 7 SUPERFAMILY MEMBER 4                                                                                                                 | -3.59264 | 0.003174 |
| NM_145133 | TRAF2 BINDING PROTEIN                                                                                                                                | -3.58976 | 0.000766 |

|           |                                                                                              |          |          |
|-----------|----------------------------------------------------------------------------------------------|----------|----------|
| AK083832  | TRIPLEPTIDYL PEPTIDASE I                                                                     | -3.58856 | 0.000648 |
| AK018744  | GRANULIN                                                                                     | -3.5858  | 0.000247 |
| NM_008147 | GLYCOPROTEIN 49 A                                                                            | -3.58546 | 0.000393 |
| NM_030707 | MACROPHAGE SCAVENGER RECEPTOR 2                                                              | -3.585   | 0.006898 |
| AK129416  | CERAMIDE KINASE                                                                              | -3.58188 | 0.001263 |
| X14951    | INTEGRIN BETA 2                                                                              | -3.5817  | 0.000956 |
| NM_026436 | TRANSMEMBRANE PROTEIN 86A                                                                    | -3.56978 | 0.000736 |
| AK045542  | HEPATOMA-DERIVED GROWTH FACTOR, RELATED PROTEIN 3                                            | -3.56716 | 0.001002 |
| NM_023044 | SOLUTE CARRIER FAMILY 15, MEMBER 3                                                           | -3.56158 | 0.002503 |
| BC043054  | COLONY STIMULATING FACTOR 1 RECEPTOR PHOSPHOINOSITIDE-3-KINASE, CATALYTIC, GAMMA POLYPEPTIDE | -3.55078 | 0.010011 |
| NM_020272 | POLYPEPTIDE                                                                                  | -3.54562 | 0.001295 |
| S70805    | ACID PHOSPHATASE 5, TARTRATE RESISTANT MEMBRANE-SPANNING 4-DOMAINS, SUBFAMILY A, MEMBER 6D   | -3.54076 | 2.65E-05 |
| NM_026835 | MEMBER 6D                                                                                    | -3.5323  | 0.002181 |
| NM_028808 | PURINERGIC RECEPTOR P2Y, G-PROTEIN COUPLED 13                                                | -3.53072 | 0.006662 |
| BC031166  | STABILIN 1                                                                                   | -3.52896 | 0.002313 |
| NM_178881 |                                                                                              | -3.51796 | 0.000948 |
| NM_145475 | CERAMIDE KINASE                                                                              | -3.5166  | 0.00188  |
| NM_010864 | MYOSIN VA                                                                                    | -3.51434 | 0.001617 |
| NM_008533 | CD180 ANTIGEN                                                                                | -3.50518 | 0.000596 |
| NM_008625 | MANNOSE RECEPTOR, C TYPE 1                                                                   | -3.50458 | 0.000928 |
| NM_133969 | KALLIKREIN B, PLASMA 1                                                                       | -3.502   | 0.001023 |
| NM_015753 | ZINC FINGER HOMEBOX 1B                                                                       | -3.49978 | 0.00107  |
| BC048553  | ACID PHOSPHATASE 1, SOLUBLE                                                                  | -3.4997  | 0.001394 |
| BC019611  | LYSOZYME                                                                                     | -3.49382 | 0.002176 |
| NM_031198 | TRANSCRIPTION FACTOR EC                                                                      | -3.48924 | 0.001054 |
| NM_017372 | LYSOZYME                                                                                     | -3.48752 | 0.002744 |
| NM_013532 | LEUKOCYTE IMMUNOGLOBULIN-LIKE RECEPTOR, SUBFAMILY B, MEMBER 4                                | -3.48342 | 0.000844 |
| AK081134  | LOW DENSITY LIPOPROTEIN RECEPTOR-RELATED PROTEIN 1                                           | -3.47876 | 0.001548 |
| NM_008512 | LOW DENSITY LIPOPROTEIN RECEPTOR-RELATED PROTEIN 1                                           | -3.47534 | 0.002824 |
| NM_016917 | SOLUTE CARRIER FAMILY 39 (IRON-REGULATED TRANSPORTER), MEMBER 1                              | -3.46748 | 0.000694 |
| BC058230  | AXL RECEPTOR TYROSINE KINASE                                                                 | -3.4669  | 0.001191 |
| AK020363  | C-TYPE LECTIN DOMAIN FAMILY 4, MEMBER A2                                                     | -3.4607  | 0.00315  |
| AF307855  | ARP3 ACTIN-RELATED PROTEIN 3 HOMOLOG (YEAST)                                                 | -3.45678 | 0.001578 |
| AK046559  | MEMBRANE-SPANNING 4-DOMAINS, SUBFAMILY A, MEMBER 7                                           | -3.44228 | 0.000266 |
| L10627    | BRUTON AGAMMAGLOBULINEMIA TYROSINE KINASE                                                    | -3.44104 | 0.000475 |
| BC043675  | LOW DENSITY LIPOPROTEIN RECEPTOR-RELATED PROTEIN 1                                           | -3.43688 | 0.001905 |
| NM_023149 | CNDP DIPEPTIDASE 2 (METALLOPEPTIDASE M20 FAMILY)                                             | -3.42766 | 0.000748 |
| AK078473  | TRANSMEMBRANE PROTEIN 119                                                                    | -3.4257  | 0.00075  |

|             |                                                                 |          |          |
|-------------|-----------------------------------------------------------------|----------|----------|
| AK084431    | TRANSFORMING GROWTH FACTOR, BETA INDUCED                        | -3.42542 | 0.002895 |
| BC038070    | FC RECEPTOR, IGG, LOW AFFINITY IIB                              | -3.4225  | 0.001164 |
| BC054112    | RIKEN CDNA 5033414K04 GENE                                      | -3.42118 | 0.000256 |
| AK017885    | RAS HOMOLOG GENE FAMILY, MEMBER H                               | -3.41664 | 0.00126  |
| NM_172589   | LIPOMA HMGIC FUSION PARTNER-LIKE 2                              | -3.41254 | 0.001044 |
| AK079513    | CD86 ANTIGEN                                                    | -3.41072 | 0.002848 |
| AK075888    | CD83 ANTIGEN                                                    | -3.4065  | 0.007132 |
| AK129206    | REGULATING SYNAPTIC MEMBRANE EXOCYTOSIS 2                       | -3.4003  | 0.000366 |
| NM_133211   | TOLL-LIKE RECEPTOR 7                                            | -3.39602 | 0.000243 |
| NM_008348   | INTERLEUKIN 10 RECEPTOR, ALPHA                                  | -3.3939  | 0.005644 |
| AK122347    | RIKEN CDNA 9330153B10 GENE                                      | -3.3901  | 0.004106 |
| AK032732    | SOLUTE CARRIER FAMILY 39 (IRON-REGULATED TRANSPORTER), MEMBER 1 | -3.38636 | 0.000448 |
| NM_053214   | MYOSIN IF                                                       | -3.38092 | 0.002161 |
| NM_009912   | CHEMOKINE (C-C MOTIF) RECEPTOR 1                                | -3.3784  | 0.001216 |
| NM_028773   | RIKEN CDNA 1200013B08 GENE                                      | -3.37762 | 0.003342 |
| AF323659    | ATP-BINDING CASSETTE, SUB-FAMILY G (WHITE), MEMBER 1            | -3.3741  | 9.42E-06 |
| NM_027552   | KYNURENINASE (L-KYNURENINE HYDROLASE)                           | -3.37306 | 0.000103 |
| NM_031159   | APOLIPOPROTEIN B EDITING COMPLEX 1                              | -3.37282 | 0.002589 |
| AK088398    | CATHEPSIN C                                                     | -3.36558 | 0.000688 |
| NM_008349   | INTERLEUKIN 10 RECEPTOR, BETA                                   | -3.3631  | 0.000313 |
| AK080845    | ZINC FINGER, DHHC DOMAIN CONTAINING 14                          | -3.35494 | 0.000513 |
| S64760      | UDP GLUCURONOSYLTRANSFERASE 1 FAMILY, POLYPEPTIDE A1            | -3.34982 | 0.000142 |
| NM_019455   | PROSTAGLANDIN D2 SYNTHASE 2, HEMATOPOIETIC                      | -3.3486  | 0.003115 |
| NM_153505   | NCK ASSOCIATED PROTEIN 1 LIKE                                   | -3.343   | 0.000395 |
| NM_207246   | RAS, GUANYL RELEASING PROTEIN 3                                 | -3.33858 | 0.000599 |
| AK028367    | LEUCINE RICH REPEAT CONTAINING 33                               | -3.3374  | 0.001116 |
| NM_178911   | PHOSPHOLIPASE D FAMILY, MEMBER 4                                | -3.33712 | 0.003776 |
| NM_00100394 | 8                                                               |          |          |
|             | RIKEN CDNA 5033414K04 GENE                                      | -3.33228 | 0.000911 |
| AK077019    | NCK ASSOCIATED PROTEIN 1 LIKE                                   | -3.32772 | 0.000318 |
| NM_008327   | INTERFERON ACTIVATED GENE 202                                   | -3.32556 | 0.00062  |
| AK033539    | SOLUTE CARRIER ORGANIC ANION TRANSPORTER FAMILY, MEMBER 2B1     | -3.31752 | 0.001284 |
| NM_011701   | VIMENTIN                                                        | -3.3154  | 7.46E-05 |
| NM_031843   | DIPEPTIDYLPEPTIDASE 7                                           | -3.31358 | 0.001578 |
| NM_020001   | C-TYPE LECTIN DOMAIN FAMILY 4, MEMBER N                         | -3.31322 | 0.002712 |
| AK129262    | FERM DOMAIN CONTAINING 4B                                       | -3.30788 | 0.002942 |
| AK017351    | RIKEN CDNA 5430427O19 GENE                                      | -3.30518 | 0.002786 |
| NM_009631   | ADENOSINE A3 RECEPTOR                                           | -3.3048  | 0.000272 |
| NM_023132   | RENIN BINDING PROTEIN                                           | -3.30474 | 4.1E-05  |
| AK083288    | SOLUTE CARRIER FAMILY 39 (IRON-REGULATED TRANSPORTER), MEMBER 1 | -3.3041  | 0.000784 |

|           |                                                                                                |          |          |
|-----------|------------------------------------------------------------------------------------------------|----------|----------|
| NM_146069 | LEUCINE RICH REPEAT CONTAINING 33                                                              | -3.30236 | 0.000664 |
| AK014374  | PLECKSTRIN HOMOLOGY DOMAIN CONTAINING, FAMILY O MEMBER 1                                       | -3.30072 | 0.003467 |
| NM_011426 | SIALIC ACID BINDING IG-LIKE LECTIN 1, SIALOADHESIN                                             | -3.29544 | 0.000468 |
| AK042502  | LEUCINE RICH REPEAT CONTAINING 33                                                              | -3.29524 | 0.000284 |
| BC065783  | LYMPHOCYTE ANTIGEN 86                                                                          | -3.29472 | 0.00238  |
| NM_011405 | SOLUTE CARRIER FAMILY 7 (CATIONIC AMINO ACID TRANSPORTER, Y+ SYSTEM), MEMBER 7                 | -3.29236 | 0.000517 |
| BC053392  | BRUTON AGAMMAGLOBULINEMIA TYROSINE KINASE                                                      | -3.28982 | 0.000316 |
| BC019400  | SYNDECAN BINDING PROTEIN                                                                       | -3.2886  | 0.00042  |
| AK028480  | MACROPHAGE SCAVENGER RECEPTOR 1                                                                | -3.28148 | 0.000322 |
| NM_008511 | LYMPHOID-RESTRICTED MEMBRANE PROTEIN                                                           | -3.2814  | 0.00451  |
| NM_010188 | FC RECEPTOR, IGG, LOW AFFINITY III                                                             | -3.28106 | 0.00308  |
| M34897    | ECOTROPIC VIRAL INTEGRATION SITE 2A                                                            | -3.2782  | 0.000408 |
| NM_134152 | LEUPAXIN                                                                                       | -3.2656  | 0.003645 |
| NM_153138 | WISKOTT-ALDRICH SYNDROME PROTEIN INTERACTING PROTEIN                                           | -3.2619  | 9.21E-06 |
| BC049251  | SOLUTE CARRIER ORGANIC ANION TRANSPORTER FAMILY, MEMBER 2B1                                    | -3.25744 | 0.001568 |
| BC034893  | C-TYPE LECTIN DOMAIN FAMILY 4, MEMBER A3                                                       | -3.25704 | 0.002959 |
| BC059047  | GLUCOSAMINE (N-ACETYL)-6-SULFATASE                                                             | -3.24632 | 0.001432 |
| AK080884  | G PROTEIN-COUPLED RECEPTOR 137B                                                                | -3.2394  | 0.001928 |
| AJ131395  | PROCOLLAGEN, TYPE XIV, ALPHA 1                                                                 | -3.23872 | 0.000324 |
| NM_022964 | LINKER FOR ACTIVATION OF T CELLS FAMILY, MEMBER 2                                              | -3.23528 | 0.001622 |
| NM_183168 | PYRIMIDINERGIC RECEPTOR P2Y, G-PROTEIN COUPLED, 6                                              | -3.23492 | 0.002909 |
| BC044664  | EXPRESSED SEQUENCE AI118514                                                                    | -3.23482 | 0.000455 |
| AK089998  | PROSAPOSIN                                                                                     | -3.2345  | 0.000822 |
| AK089998  | PROSAPOSIN                                                                                     | -3.2345  | 0.000822 |
| NM_026887 | RIKEN CDNA 1500012A13 GENE                                                                     | -3.23386 | 0.002107 |
| NM_019734 | N-ACYLSPHINGOSINE AMIDOHYDROLASE 1                                                             | -3.23308 | 0.001089 |
| NM_011030 | PROCOLLAGEN-PROLINE, 2-OXOGLUTARATE 4-DIOXYGENASE (PROLINE 4-HYDROXYLASE), ALPHA 1 POLYPEPTIDE | -3.22344 | 0.001997 |
| NM_172508 | SQUAMOUS CELL CARCINOMA ANTIGEN RECOGNIZED BY T CELLS 2                                        | -3.21822 | 0.000142 |
| NM_181348 |                                                                                                | -3.2061  | 1.4E-05  |
| NM_020026 | UDP-GAL:BETAGLCNAC BETA 1,3-GALACTOSYLTRANSFERASE, POLYPEPTIDE 3                               | -3.20522 | 0.001635 |
| NM_009924 | CANNABINOID RECEPTOR 2 (MACROPHAGE)                                                            | -3.20308 | 0.001111 |
| NM_009035 | RECOMBINING BINDING PROTEIN SUPPRESSOR OF HAIRLESS (DROSOPHILA)                                | -3.203   | 0.000168 |
| NM_008906 | PROTECTIVE PROTEIN FOR BETA-GALACTOSIDASE                                                      | -3.20268 | 0.000494 |
| NM_145148 | FERM DOMAIN CONTAINING 4B                                                                      | -3.2024  | 0.003164 |
| NM_178611 | LEUKOCYTE-ASSOCIATED IG-LIKE RECEPTOR 1                                                        | -3.19912 | 0.001843 |

|           |                                                                                                        |          |          |
|-----------|--------------------------------------------------------------------------------------------------------|----------|----------|
| AK050129  | EXPRESSED SEQUENCE AI788969                                                                            | -3.19894 | 0.000671 |
| NM_009099 | TRIPARTITE MOTIF PROTEIN 30                                                                            | -3.19616 | 0.001084 |
| NM_173014 | ACYLTRANSFERASE LIKE 1                                                                                 | -3.1945  | 0.001385 |
| AK004668  | TUMOR NECROSIS FACTOR RECEPTOR SUPERFAMILY, MEMBER 13B                                                 | -3.1898  | 0.003865 |
| NM_008885 | PERIPHERAL MYELIN PROTEIN                                                                              | -3.18518 | 0.000123 |
| BC025587  | UNC-93 HOMOLOG B1 (C. ELEGANS)                                                                         | -3.18324 | 0.005178 |
| NM_011075 | ATP-BINDING CASSETTE, SUB-FAMILY B (MDR/TAP), MEMBER 1B                                                | -3.182   | 0.001077 |
| NM_175437 | RIKEN CDNA A530088I07 GENE                                                                             | -3.17324 | 0.001854 |
| AK003837  | UDP-GAL:BETAGLCNAC BETA 1,3-GALACTOSYLTRANSFERASE, POLYPEPTIDE 3                                       | -3.16558 | 0.001935 |
| NM_010876 | NEUTROPHIL CYTOSOLIC FACTOR 1                                                                          | -3.16304 | 0.002299 |
| AK029256  | ATP-BINDING CASSETTE TRANSPORTER SUB-FAMILY A MEMBER 9                                                 | -3.1575  | 0.004345 |
| NM_026405 | RAB32, MEMBER RAS ONCOGENE FAMILY                                                                      | -3.1548  | 0.000931 |
| AK021181  | MYOSIN IF                                                                                              | -3.15442 | 0.002988 |
| NM_029364 | GLUCOSAMINE (N-ACETYL)-6-SULFATASE                                                                     | -3.15242 | 0.001589 |
| AB041594  | RIKEN CDNA 6330407G11 GENE                                                                             | -3.15088 | 0.000266 |
| BC057650  | MYOCYTE ENHANCER FACTOR 2C                                                                             | -3.14562 | 4.55E-05 |
| NM_010745 | LYMPHOCYTE ANTIGEN 86                                                                                  | -3.14552 | 0.003004 |
| BC067006  | MYOD FAMILY INHIBITOR DOMAIN CONTAINING                                                                | -3.14516 | 0.001964 |
| NM_009779 | COMPLEMENT COMPONENT 3A RECEPTOR 1                                                                     | -3.14432 | 0.000501 |
| NM_013590 | P LYSOZYME STRUCTURAL                                                                                  | -3.14268 | 0.003778 |
| BC029876  | NEUROFILIN 2                                                                                           | -3.14116 | 9.47E-05 |
| NM_175088 | MYOD FAMILY INHIBITOR DOMAIN CONTAINING SOLUTE CARRIER FAMILY 9 (SODIUM/HYDROGEN EXCHANGER), ISOFORM 9 | -3.14026 | 0.001634 |
| NM_177909 | INTERFERON REGULATORY FACTOR 8                                                                         | -3.1399  | 0.001167 |
| NM_008320 | INTERLEUKIN 18                                                                                         | -3.13598 | 0.0044   |
| NM_008360 | FERM DOMAIN CONTAINING 4B                                                                              | -3.1355  | 0.000452 |
| AK031491  | CD68 ANTIGEN                                                                                           | -3.13076 | 0.003542 |
| NM_177745 | HEMATOPOIETICALLY EXPRESSED HOMEBOX                                                                    | -3.12784 | 0.000655 |
| BC021637  | FYN BINDING PROTEIN                                                                                    | -3.11896 | 0.000501 |
| NM_008245 | HYPOTHETICAL PROTEIN 6430704N06                                                                        | -3.11886 | 0.000222 |
| AF061744  | ECTONUCLEOSIDE TRIPHOSPHATE DIPHOSPHOHYDROLASE 1                                                       | -3.11262 | 0.001685 |
| AK032609  | RIKEN CDNA 1110007C02 GENE                                                                             | -3.11102 | 0.000333 |
| NM_009848 | CDNA SEQUENCE AF529169                                                                                 | -3.10538 | 0.002543 |
| NM_027923 | ACTIVE BCR-RELATED GENE                                                                                | -3.1033  | 0.002062 |
| AK046286  | CD37 ANTIGEN                                                                                           | -3.103   | 0.000946 |
| NM_198895 | A DISINTEGRIN AND METALLOPEPTIDASE DOMAIN 9 (MELTRIN GAMMA)                                            | -3.1003  | 0.002564 |
| NM_007645 | INOSITOL POLYPHOSPHATE-5-PHOSPHATASE D                                                                 | -3.09696 | 0.002474 |
| NM_007404 |                                                                                                        | -3.09304 | 0.000431 |
| AF184912  |                                                                                                        | -3.08686 | 0.002435 |



|             |                                                                                        |          |          |
|-------------|----------------------------------------------------------------------------------------|----------|----------|
| AK077772    | PHOSPHOINOSITIDE-3-KINASE, CATALYTIC, GAMMA POLYPEPTIDE                                | -3.0851  | 0.000735 |
| AK007777    | PHOSPHOINOSITIDE-3-KINASE ADAPTOR PROTEIN 1                                            | -3.08214 | 0.001249 |
| NM_011905   | TOLL-LIKE RECEPTOR 2                                                                   | -3.08188 | 0.00641  |
| NM_00100436 |                                                                                        |          |          |
| 3           | ZNUAK FAMILY, SNF1-LIKE KINASE, 1                                                      | -3.0779  | 0.002211 |
| AF020313    | AMYLOID BETA (A4) PRECURSOR PROTEIN-BINDING, FAMILY B, MEMBER 1 INTERACTING PROTEIN    | -3.07166 | 0.001147 |
| AK036167    | SRC-LIKE ADAPTOR                                                                       | -3.0712  | 0.002973 |
| NM_030682   | TOLL-LIKE RECEPTOR 1                                                                   | -3.07096 | 0.008829 |
| NM_023423   | RIKEN CDNA 6330407G11 GENE                                                             | -3.06876 | 0.000301 |
| AK122188    | A DISINTEGRIN AND METALLOPEPTIDASE DOMAIN 9 (MELTRIN GAMMA)                            | -3.06614 | 0.000365 |
| AF542387    | ZINC FINGER, DHHC DOMAIN CONTAINING 14                                                 | -3.06346 | 0.00158  |
| BC031369    | FERM DOMAIN CONTAINING 4B                                                              | -3.05688 | 0.002833 |
| NM_010902   | NUCLEAR FACTOR, ERYTHROID DERIVED 2, LIKE 2                                            | -3.05668 | 0.000281 |
| NM_010330   | EMBIGIN                                                                                | -3.05394 | 0.000322 |
| BC048682    | DYSTROBREVIN BINDING PROTEIN 1                                                         | -3.04724 | 0.00044  |
| NM_025772   | DYSTROBREVIN BINDING PROTEIN 1                                                         | -3.04612 | 0.000358 |
| AY423851    | HYPOXANTHINE GUANINE PHOSPHORIBOSYL TRANSFERASE 1                                      | -3.04462 | 0.000366 |
| NM_028035   | SORTING NEXIN 10                                                                       | -3.04252 | 0.000273 |
| NM_024465   | RIKEN CDNA 6330583M11 GENE                                                             | -3.04162 | 0.001514 |
| NM_010566   | INOSITOL POLYPHOSPHATE-5-PHOSPHATASE D PROTEIN TYROSINE PHOSPHATASE, NON-RECEPTOR TYPE | -3.04126 | 0.004583 |
| BC025886    | SUBSTRATE 1                                                                            | -3.03854 | 0.003289 |
| NM_021281   | CATHEPSIN S                                                                            | -3.03694 | 0.001774 |
| NM_008509   | LIPOPROTEIN LIPASE                                                                     | -3.0347  | 0.003171 |
| AF043256    | INTEGRIN BETA 5                                                                        | -3.03442 | 0.004449 |
| AK028366    | CATHEPSIN S                                                                            | -3.03272 | 0.001934 |
| NM_025972   | N-ACYLSPHINGOSINE AMIDOHYDROLASE (ACID CERAMIDASE)-LIKE                                | -3.03262 | 0.005978 |
| NM_008587   | C-MER PROTO-ONCOGENE TYROSINE KINASE                                                   | -3.0267  | 0.004948 |
| BC040467    | ZNUAK FAMILY, SNF1-LIKE KINASE, 1                                                      | -3.02232 | 0.004301 |
| AJ002386    | CATHEPSIN S                                                                            | -3.01904 | 0.001581 |
| NM_009139   | CHEMOKINE (C-C MOTIF) LIGAND 6                                                         | -3.01752 | 0.006528 |
| AY157834    | INTERLEUKIN 18                                                                         | -3.00244 | 0.00032  |
| BC022136    | STABILIN 1                                                                             | -2.99974 | 0.000769 |
| NM_175316   | SOLUTE CARRIER ORGANIC ANION TRANSPORTER FAMILY, MEMBER 2B1                            | -2.99644 | 0.001158 |
| NM_026386   | SORTING NEXIN 2                                                                        | -2.99638 | 0.001327 |
| BC057864    | CD300 ANTIGEN LIKE FAMILY MEMBER F                                                     | -2.99448 | 0.00103  |
| NM_198018   | ACTIVE BCR-RELATED GENE                                                                | -2.99138 | 0.002785 |
| BC002138    | RIKEN CDNA 6330583M11 GENE                                                             | -2.98972 | 0.00097  |

|           |                                                                                                    |          |          |
|-----------|----------------------------------------------------------------------------------------------------|----------|----------|
| NM_022321 | PARVIN, GAMMA                                                                                      | -2.98738 | 0.000709 |
| NM_145976 | CDNA SEQUENCE BC027057                                                                             | -2.98514 | 0.003315 |
| AK041479  | RIKEN CDNA A430107D22 GENE                                                                         | -2.98394 | 0.001353 |
| NM_009673 | ANNEXIN A5                                                                                         | -2.98392 | 0.000536 |
| AB011812  | PROTEIN KINASE C, DELTA                                                                            | -2.97898 | 0.005979 |
| BC059064  | ACTIVE BCR-RELATED GENE                                                                            | -2.97474 | 0.003114 |
| NM_173394 | TOLL-LIKE RECEPTOR ADAPTOR MOLECULE 2                                                              | -2.97298 | 0.000143 |
| NM_008292 | HYDROXYSTEROID (17-BETA) DEHYDROGENASE 4                                                           | -2.97242 | 0.001045 |
| X05837    | HEAT SHOCK PROTEIN 8                                                                               | -2.9716  | 0.000202 |
| NM_016797 | SYNTAXIN 7                                                                                         | -2.97114 | 0.0007   |
| NM_008737 | NEUROFILIN 1                                                                                       | -2.9706  | 0.001189 |
| NM_012057 | INTERFERON REGULATORY FACTOR 5                                                                     | -2.97024 | 0.008675 |
| BC043066  | RAS RELATED PROTEIN 2A                                                                             | -2.9606  | 0.000985 |
| BC026506  | MICRORCHIDIA 3                                                                                     | -2.95826 | 0.002106 |
| BC055044  | ERYTHROCYTE PROTEIN BAND 4.1-LIKE 2                                                                | -2.95348 | 0.000978 |
| AK011423  | GLUCOSAMINE (N-ACETYL)-6-SULFATASE<br>PHOSPHATIDYLINOSITOL-4-PHOSPHATE 5-KINASE, TYPE II,<br>ALPHA | -2.94334 | 0.001482 |
| NM_008845 | ADP-RIBOSYLATION FACTOR-LIKE 11                                                                    | -2.9405  | 0.001979 |
| NM_177337 | CDNA SEQUENCE BC026585                                                                             | -2.93716 | 0.000547 |
| BC026585  | ACTIVE BCR-RELATED GENE                                                                            | -2.93544 | 0.001232 |
| NM_198894 | HYPOTHETICAL PROTEIN LOC243772                                                                     | -2.927   | 0.002602 |
| AK129429  | INTERFERON GAMMA RECEPTOR 1                                                                        | -2.92134 | 0.000782 |
| NM_010511 | COMPLEMENT COMPONENT 1, Q SUBCOMPONENT,<br>RECEPTOR 1                                              | -2.9166  | 0.003114 |
| NM_010740 | RIKEN CDNA 0910001A06 GENE                                                                         | -2.91106 | 0.002236 |
| NM_144846 | SCAVENGER RECEPTOR CLASS B, MEMBER 2                                                               | -2.90944 | 0.000784 |
| NM_007644 | ER DEGRADATION ENHANCER, MANNOSIDASE ALPHA-LIKE 1                                                  | -2.90886 | 0.001675 |
| AK129090  | PEROXISOME PROLIFERATOR ACTIVATED RECEPTOR<br>GAMMA                                                | -2.9012  | 0.001189 |
| AY243585  | ADP-RIBOSYLATION FACTOR-LIKE 4C                                                                    | -2.901   | 0.000461 |
| NM_177305 | STROMAL CELL DERIVED FACTOR RECEPTOR 1                                                             | -2.89934 | 0.001804 |
| NM_009145 | HEAT SHOCK PROTEIN 8                                                                               | -2.89882 | 0.002271 |
| X05837    | RAS P21 PROTEIN ACTIVATOR 3                                                                        | -2.89722 | 0.000226 |
| BC057300  | HEAT SHOCK PROTEIN 8                                                                               | -2.89338 | 0.002327 |
| X05837    | TBC1 DOMAIN FAMILY, MEMBER 9                                                                       | -2.89196 | 0.000246 |
| BC057027  | SOLUTE CARRIER FAMILY 12, MEMBER 6                                                                 | -2.88796 | 0.000318 |
| NM_133648 | RIKEN CDNA 4632417K18 GENE                                                                         | -2.88434 | 0.003157 |
| NM_026640 | TBC1 DOMAIN FAMILY, MEMBER 9                                                                       | -2.8838  | 0.000408 |
| NM_027758 | RIKEN CDNA C130050O18 GENE                                                                         | -2.87694 | 0.000434 |
| NM_177000 | PEROXISOME PROLIFERATOR ACTIVATED RECEPTOR<br>GAMMA                                                | -2.87668 | 0.000933 |
| U01841    | GENERAL TRANSCRIPTION FACTOR II H, POLYPEPTIDE 2                                                   | -2.87442 | 0.000487 |
| NM_022011 | PHOSPHODIESTERASE 3B, CGMP-INHIBITED                                                               | -2.86808 | 0.001368 |
| X95521    |                                                                                                    | -2.86748 | 0.001839 |

|             |                                                                                                     |          |          |
|-------------|-----------------------------------------------------------------------------------------------------|----------|----------|
| NM_028608   | GLI PATHOGENESIS-RELATED 1 (GLIOMA)                                                                 | -2.86468 | 0.002891 |
| NM_009025   | RAS P21 PROTEIN ACTIVATOR 3                                                                         | -2.86156 | 0.003406 |
| BC005417    | RAS-RELATED GTP BINDING C                                                                           | -2.86058 | 0.001682 |
| NM_133649   | SOLUTE CARRIER FAMILY 12, MEMBER 6                                                                  | -2.85324 | 0.004965 |
| NM_007535   | B-CELL LEUKEMIA/LYMPHOMA 2 RELATED PROTEIN A1C<br>PROTEIN KINASE, CAMP DEPENDENT REGULATORY, TYPE I | -2.84998 | 0.004168 |
| NM_008923   | BETA                                                                                                | -2.84938 | 0.001139 |
| AK030757    | ERYTHROCYTE PROTEIN BAND 4.1-LIKE 2                                                                 | -2.84524 | 0.000633 |
| AK086714    | RIKEN CDNA 2310079N02 GENE                                                                          | -2.83922 | 0.00054  |
| NM_00100550 | RHO GTPASE ACTIVATING PROTEIN 30                                                                    | -2.83604 | 0.004302 |
| M92933      | PROTEIN TYROSINE PHOSPHATASE, RECEPTOR TYPE, C                                                      | -2.83592 | 0.00095  |
| NM_028712   | RAP2B, MEMBER OF RAS ONCOGENE FAMILY                                                                | -2.8316  | 2E-05    |
| S70108      | CD86 ANTIGEN                                                                                        | -2.8283  | 0.002666 |
| NM_030710   | SLAM FAMILY MEMBER 6                                                                                | -2.82824 | 0.003082 |
| NM_00100586 | DENDRITIC CELL INHIBITORY RECEPTOR 2                                                                | -2.81858 | 0.003541 |
| NM_007798   | CATHEPSIN B                                                                                         | -2.81422 | 0.001371 |
| NM_010442   | HEME OXYGENASE (DECYCLING) 1                                                                        | -2.8132  | 0.00263  |
| NM_172603   | PHD FINGER PROTEIN 11                                                                               | -2.81148 | 0.0085   |
| NM_021507   | SULFIDE QUINONE REDUCTASE-LIKE (YEAST)                                                              | -2.8065  | 0.006177 |
| BC025502    | RIKEN CDNA 0610025G21 GENE                                                                          | -2.80552 | 0.004633 |
| AK029009    | C-MER PROTO-ONCOGENE TYROSINE KINASE                                                                | -2.80214 | 0.003264 |
| AK029512    | ECTONUCLEOSIDE TRIPHOSPHATE DIPHOSPHOHYDROLASE 1                                                    | -2.79634 | 0.007045 |
| NM_029519   | RAS RELATED PROTEIN 2A                                                                              | -2.7914  | 0.000581 |
| BC031984    | HISTOCOMPATIBILITY 2, M REGION LOCUS 3<br>PROTEIN PHOSPHATASE 1, REGULATORY (INHIBITOR)             | -2.7895  | 0.003    |
| NM_177741   | SUBUNIT 3B                                                                                          | -2.78542 | 0.000388 |
| BC037732    | RAS-RELATED GTP BINDING C<br>ATPASE, H+ TRANSPORTING, LYSOSOMAL (VACUOLAR                           | -2.78232 | 0.001696 |
| U13839      | PROTON PUMP) 42KD                                                                                   | -2.78008 | 0.00072  |
| NM_175116   | PURINERGIC RECEPTOR P2Y, G-PROTEIN COUPLED, 5                                                       | -2.77512 | 0.00053  |
| AK028875    | CHEMOKINE (C-X-C MOTIF) LIGAND 16                                                                   | -2.76806 | 0.001104 |
| AK052299    | STEROL O-ACYLTRANSFERASE 1                                                                          | -2.76732 | 4.99E-05 |
| BC006737    | CASPASE 8                                                                                           | -2.76634 | 0.000363 |
| BC021472    | INTERLEUKIN 13 RECEPTOR, ALPHA 1                                                                    | -2.763   | 0.001045 |
| NM_133685   | RIKEN CDNA 1700093E07 GENE                                                                          | -2.76204 | 0.001921 |
| NM_007534   | B-CELL LEUKEMIA/LYMPHOMA 2 RELATED PROTEIN A1A                                                      | -2.76106 | 0.001301 |
| NM_007534   | B-CELL LEUKEMIA/LYMPHOMA 2 RELATED PROTEIN A1A                                                      | -2.75728 | 0.0016   |
| NM_007534   | B-CELL LEUKEMIA/LYMPHOMA 2 RELATED PROTEIN A1B<br>ATPASE, H+ TRANSPORTING, LYSOSOMAL (VACUOLAR      | -2.75728 | 0.0016   |
| AY033882    | PROTON PUMP), SUBUNIT 1                                                                             | -2.75304 | 0.001156 |
| U55060      | LECTIN, GALACTOSE BINDING, SOLUBLE 9                                                                | -2.74844 | 0.000955 |
| BC026382    | G PROTEIN-COUPLED RECEPTOR 155                                                                      | -2.7483  | 0.002539 |

|             |                                                                                                |          |          |
|-------------|------------------------------------------------------------------------------------------------|----------|----------|
| NM_011673   | UDP-GLUCOSE CERAMIDE GLUCOSYLTRANSFERASE                                                       | -2.73874 | 0.000149 |
| NM_019821   | GLYCOLIPID TRANSFER PROTEIN                                                                    | -2.73858 | 0.001079 |
| NM_011706   | TRANSIENT RECEPTOR POTENTIAL CATION CHANNEL,<br>SUBFAMILY V, MEMBER 2                          | -2.73562 | 0.004535 |
| NM_028732   | RIKEN CDNA 4632428N05 GENE                                                                     | -2.72854 | 0.004695 |
| NM_013689   | CYTOPLASMIC TYROSINE KINASE, DSCR28C RELATED<br>(DROSOPHILA)                                   | -2.72848 | 0.002344 |
| BC049097    | LYSOSOMAL MEMBRANE GLYCOPROTEIN 1                                                              | -2.72398 | 0.002478 |
| NM_008720   | NIEMANN PICK TYPE C1                                                                           | -2.71978 | 0.002625 |
| AK079252    | C-MER PROTO-ONCOGENE TYROSINE KINASE                                                           | -2.71596 | 0.00184  |
| AK087960    | PROTEOGLYCAN 1, SECRETORY GRANULE                                                              | -2.71394 | 0.000936 |
| NM_153510   | EXPRESSED SEQUENCE AV021745                                                                    | -2.71114 | 0.010139 |
| AK028625    | ECTONUCLEOSIDE TRIPHOSPHATE DIPHOSPHOHYDROLASE 1<br>YAMAGUCHI SARCOMA VIRAL (V-YES-1) ONCOGENE | -2.70922 | 0.002705 |
| NM_010747   | HOMOLOG                                                                                        | -2.70642 | 0.001419 |
| NM_144830   | TRANSMEMBRANE PROTEIN 106A                                                                     | -2.70242 | 0.001487 |
| NM_007535   | B-CELL LEUKEMIA/LYMPHOMA 2 RELATED PROTEIN A1C                                                 | -2.6973  | 0.007095 |
| AK051270    | RIKEN CDNA 1700093E07 GENE                                                                     | -2.6939  | 0.002739 |
| BC060261    | PROTEIN PHOSPHATASE 1, REGULATORY (INHIBITOR)<br>SUBUNIT 3B                                    | -2.69378 | 0.000518 |
| NM_133721   | RIKEN CDNA 2610002H11 GENE                                                                     | -2.69106 | 0.000449 |
| NM_010129   | EPITHELIAL MEMBRANE PROTEIN 3                                                                  | -2.69096 | 0.000371 |
| NM_134131   | TUMOR NECROSIS FACTOR, ALPHA-INDUCED PROTEIN 8                                                 | -2.69072 | 0.0014   |
| NM_145158   | ELASTIN MICROFIBRIL INTERFACER 2                                                               | -2.68654 | 0.007068 |
| NM_009163   | SPHINGOSINE PHOSPHATE LYASE 1                                                                  | -2.68646 | 7.02E-05 |
| NM_022320   | G PROTEIN-COUPLED RECEPTOR 35                                                                  | -2.68402 | 0.001853 |
| NM_198617   | TSPY-LIKE 3                                                                                    | -2.6835  | 0.00079  |
| NM_008505   | LIM DOMAIN ONLY 2                                                                              | -2.68336 | 0.001613 |
| NM_013556   | HYPOXANTHINE GUANINE PHOSPHORIBOSYL TRANSFERASE<br>1                                           | -2.68098 | 0.000454 |
| AK036232    | DNA SEGMENT, CHR 12, ERATO DOI 553, EXPRESSED                                                  | -2.67846 | 0.002168 |
| AK007716    | ALDO-KETO REDUCTASE FAMILY 1, MEMBER C12                                                       | -2.67704 | 0.001528 |
| NM_007486   | RHO, GDP DISSOCIATION INHIBITOR (GDI) BETA                                                     | -2.67698 | 0.003685 |
| AK083987    | RIKEN CDNA 2610002H11 GENE                                                                     | -2.67666 | 0.000335 |
| NM_00100149 | 1                                                                                              |          |          |
| 1           | TROPOMYOSIN 4                                                                                  | -2.6729  | 0.000119 |
| NM_023735   | ARP3 ACTIN-RELATED PROTEIN 3 HOMOLOG (YEAST)                                                   | -2.67098 | 0.000257 |
| BC036146    | TISSUE FACTOR PATHWAY INHIBITOR                                                                | -2.65906 | 0.000882 |
| BC051387    | RECOMBINING BINDING PROTEIN SUPPRESSOR OF HAIRLESS<br>(DROSOPHILA)                             | -2.65464 | 4.14E-05 |
| AK044121    | CD34 ANTIGEN                                                                                   | -2.65294 | 0.005091 |
| NM_007388   | ACID PHOSPHATASE 5, TARTRATE RESISTANT                                                         | -2.64776 | 0.000247 |
| NM_008225   | HEMATOPOIETIC CELL SPECIFIC LYN SUBSTRATE 1                                                    | -2.64734 | 0.003726 |
| BC019682    | CATHEPSIN D                                                                                    | -2.64676 | 0.001379 |

|           |                                                                       |          |          |
|-----------|-----------------------------------------------------------------------|----------|----------|
| NM_008035 | FOLATE RECEPTOR 2 (FETAL)                                             | -2.6458  | 0.003514 |
| BC066212  | LYMPHOCYTE ANTIGEN 9                                                  | -2.64232 | 0.004466 |
| AK008543  | ST3 BETA-GALACTOSIDE ALPHA-2,3-SIALYLTRANSFERASE 4                    | -2.64218 | 0.001117 |
| NM_009790 | CALMODULIN 1                                                          | -2.64082 | 0.001741 |
| NM_011303 | DEHYDROGENASE/REDUCTASE (SDR FAMILY) MEMBER 3                         | -2.63944 | 1.44E-05 |
| NM_011338 | CHEMOKINE (C-C MOTIF) LIGAND 9                                        | -2.63446 | 0.000983 |
| AK087634  | STABILIN 1                                                            | -2.63382 | 0.001815 |
| AJ222814  | B-CELL LINKER                                                         | -2.63078 | 0.001093 |
| NM_134250 | HEPATITIS A VIRUS CELLULAR RECEPTOR 2                                 | -2.62862 | 0.001866 |
| NM_010242 | FUCOSYLTRANSFERASE 4                                                  | -2.62842 | 5.8E-05  |
| NM_011303 | DEHYDROGENASE/REDUCTASE (SDR FAMILY) MEMBER 3                         | -2.62596 | 6.69E-05 |
| BC054824  | SIGNAL-INDUCED PROLIFERATION ASSOCIATED GENE 1                        | -2.62098 | 0.003622 |
| NM_028836 | CHITOBIASE, DI-N-ACETYL-                                              | -2.61974 | 0.001356 |
| NM_013837 | PROTEIN-TYROSINE SULFOTRANSFERASE 1                                   | -2.61746 | 0.000712 |
| U20314    | HISTOCOMPATIBILITY 2, CLASS II, LOCUS MB1                             | -2.6139  | 0.007119 |
| AF114437  | PHOSPHATIDYLCHOLINE TRANSFER PROTEIN                                  | -2.61318 | 0.000184 |
| AF114437  | PHOSPHATIDYLCHOLINE TRANSFER PROTEIN                                  | -2.61318 | 0.000184 |
| AF146516  | PURINERGIC RECEPTOR P2X, LIGAND-GATED ION CHANNEL 4                   | -2.60952 | 0.007675 |
| BC049939  | RIKEN CDNA 2610002H11 GENE                                            | -2.6068  | 0.000207 |
| M29009    | COMPLEMENT COMPONENT FACTOR H                                         | -2.60258 | 0.004108 |
| AK088815  | LYMPHOCYTE ANTIGEN 9                                                  | -2.60246 | 0.00402  |
| NM_019491 | V-RAL SIMIAN LEUKEMIA VIRAL ONCOGENE HOMOLOG A (RAS RELATED)          | -2.60008 | 0.000508 |
| NM_133825 | DNA SEGMENT, CHR 1, ERATO DOI 622, EXPRESSED                          | -2.59382 | 0.001116 |
| NM_007901 | ENDOTHELIAL DIFFERENTIATION SPHINGOLIPID G-PROTEIN-COUPLED RECEPTOR 1 | -2.5907  | 0.002032 |
| NM_028243 | RIKEN CDNA 2610104A14 GENE                                            | -2.58916 | 0.000637 |
| AF251704  | CD300A ANTIGEN                                                        | -2.58874 | 0.00556  |
| BC019368  | PROTEASOME (PROSOME, MACROPAIN) SUBUNIT, ALPHA TYPE, 8                | -2.5862  | 0.000237 |
| NM_007853 | DEGENERATIVE SPERMATOCYTE HOMOLOG 1 (DROSOPHILA)                      | -2.5837  | 0.000222 |
| BC028755  | PROTEIN C RECEPTOR, ENDOTHELIAL                                       | -2.5762  | 0.000833 |
| NM_022325 | CATHEPSIN Z                                                           | -2.57568 | 0.000652 |
| BC023348  | COPINE II                                                             | -2.57428 | 0.002543 |
| AK088400  | SOLUTE CARRIER FAMILY 4, SODIUM BICARBONATE COTRANSPORTER, MEMBER 7   | -2.57134 | 0.001087 |
| BC047135  | CYTOPLASMIC FMR1 INTERACTING PROTEIN 1                                | -2.57128 | 0.002711 |
| AK036591  | RING FINGER PROTEIN 13                                                | -2.57124 | 0.001379 |
| NM_145541 | RAS-RELATED PROTEIN-1A                                                | -2.56916 | 0.000156 |
| BC004852  | RIKEN CDNA 1700093E07 GENE                                            | -2.56882 | 0.004841 |
| BC052529  | IBR DOMAIN CONTAINING 3                                               | -2.56608 | 0.006028 |
| NM_008133 | GLUTAMATE DEHYDROGENASE 1                                             | -2.55912 | 0.001705 |
| NM_027100 | RWD DOMAIN CONTAINING 2                                               | -2.55524 | 0.001186 |
| NM_009658 | ALDO-KETO REDUCTASE FAMILY 1, MEMBER B3 (ALDOSE                       | -2.55124 | 0.003177 |

|           | REDUCTASE)                                                       |          |          |
|-----------|------------------------------------------------------------------|----------|----------|
| AK006330  | G PROTEIN-COUPLED RECEPTOR 160                                   | -2.55028 | 0.000297 |
| NM_181277 | PROCOLLAGEN, TYPE XIV, ALPHA 1                                   | -2.54878 | 0.000357 |
| AK008904  | RIKEN CDNA 1110002B05 GENE                                       | -2.54676 | 0.000514 |
| BC006865  | PROTEIN DISULFIDE ISOMERASE ASSOCIATED 6                         | -2.54114 | 0.000417 |
| S53716    | CYTOPLASMIC TYROSINE KINASE, DSCR28C RELATED<br>(DROSOPHILA)     | -2.54084 | 0.003787 |
| NM_008131 | GLUTAMATE-AMMONIA LIGASE (GLUTAMINE SYNTHETASE)                  | -2.54024 | 2.06E-07 |
| NM_022018 | NIBAN PROTEIN                                                    | -2.53896 | 0.004625 |
| NM_011406 | SOLUTE CARRIER FAMILY 8 (SODIUM/CALCIUM<br>EXCHANGER), MEMBER 1  | -2.53608 | 8.91E-05 |
| NM_009663 | ARACHIDONATE 5-LIPOXYGENASE ACTIVATING PROTEIN                   | -2.53448 | 0.000625 |
| BC026424  | RIKEN CDNA 2610104A14 GENE                                       | -2.5313  | 0.000604 |
| NM_008328 | INTERFERON ACTIVATED GENE 203                                    | -2.5297  | 0.001705 |
| AF490347  | DEVELOPMENTAL PLURIPOTENCY-ASSOCIATED 3                          | -2.52306 | 0.000147 |
| NM_008979 | PROTEIN TYROSINE PHOSPHATASE, NON-RECEPTOR TYPE 22<br>(LYMPHOID) | -2.51898 | 0.003645 |
| NM_018773 | SRC FAMILY ASSOCIATED PHOSPHOPROTEIN 2                           | -2.51492 | 0.001529 |
| NM_008917 | PALMITOYL-PROTEIN THIOESTERASE 1                                 | -2.5122  | 0.000983 |
| NM_009794 | CALPAIN 2                                                        | -2.51172 | 0.000913 |
| NM_175254 | RIKEN CDNA 9330180L21 GENE                                       | -2.50476 | 0.000486 |
| AK129359  | CTTNBP2 N-TERMINAL LIKE                                          | -2.50426 | 0.001084 |
| AK053527  | HYPOTHETICAL PROTEIN, MNCB-5555                                  | -2.50152 | 0.000266 |
| NM_172442 | DELTEX 4 HOMOLOG (DROSOPHILA)                                    | -2.50132 | 0.00153  |
| NM_144843 | MYOTUBULARIN RELATED PROTEIN 6                                   | -2.50066 | 0.002575 |
| AK040959  | RIKEN CDNA 9330153B10 GENE                                       | -2.50062 | 0.003708 |
| AK012103  | HYDROXYSTEROID (17-BETA) DEHYDROGENASE 12                        | -2.50058 | 6.57E-05 |
| BC064130  | FASCICULATION AND ELONGATION PROTEIN ZETA 2 (ZYGIN<br>II)        | -2.50048 | 0.000111 |
| NM_181397 | RIKEN CDNA 2310015N21 GENE                                       | -2.49924 | 0.00085  |
| NM_008534 | LYMPHOCYTE ANTIGEN 9                                             | -2.49798 | 0.007554 |
| NM_177171 | HYPOTHETICAL PROTEIN LOC268546                                   | -2.49676 | 0.000756 |
| NM_009760 | BCL2/ADENOVIRUS E1B INTERACTING PROTEIN 1, NIP3                  | -2.49102 | 0.002643 |
| NM_008879 | LYMPHOCYTE CYTOSOLIC PROTEIN 1                                   | -2.48712 | 0.001343 |
| BC006785  | LYSOSOMAL MEMBRANE GLYCOPROTEIN 1                                | -2.48512 | 0.00067  |
| NM_138677 | ER DEGRADATION ENHANCER, MANNOSIDASE ALPHA-LIKE 1                | -2.47818 | 0.00047  |
| AK017908  | TORSIN FAMILY 3, MEMBER A                                        | -2.47414 | 0.002091 |
| AK122515  | RIKEN CDNA 1110067B02 GENE                                       | -2.4729  | 0.006587 |
| AF434663  | IMMUNOGLOBULIN SUPERFAMILY, MEMBER 4A                            | -2.472   | 0.0002   |
| NM_172537 | RIKEN CDNA 1110067B02 GENE                                       | -2.47122 | 0.006608 |
| AF121118  | SOLUTE CARRIER FAMILY 12, MEMBER 4                               | -2.47076 | 0.003955 |
| NM_008548 | MANNOSIDASE 1, ALPHA                                             | -2.47024 | 0.000656 |
| NM_008663 | MYOSIN VIIA                                                      | -2.46864 | 0.00094  |
| NM_011461 | SPI-C TRANSCRIPTION FACTOR (SPI-1/PU.1 RELATED)                  | -2.4671  | 0.003518 |

|           |                                                                                     |          |          |
|-----------|-------------------------------------------------------------------------------------|----------|----------|
| NM_007781 | COLONY STIMULATING FACTOR 2 RECEPTOR, BETA 2, LOW-AFFINITY (GRANULOCYTE-MACROPHAGE) | -2.46422 | 0.000991 |
| NM_024454 | RAB21, MEMBER RAS ONCOGENE FAMILY                                                   | -2.4632  | 0.00048  |
| U89400    | ACTIN, BETA, CYTOPLASMIC                                                            | -2.46224 | 0.000791 |
| NM_172475 | FERM DOMAIN CONTAINING 4A                                                           | -2.46204 | 0.002521 |
| NM_027288 | RIKEN CDNA 2410030007 GENE                                                          | -2.46066 | 0.000972 |
| AK076519  | ADP-RIBOSYLATION FACTOR-LIKE 6 INTERACTING PROTEIN 5                                | -2.45946 | 0.010135 |
| BC049626  | SYCP3 LIKE Y-LINKED                                                                 | -2.45922 | 0.001422 |
| NM_008828 | PHOSPHOGLYCERATE KINASE 1                                                           | -2.45626 | 9.03E-05 |
| NM_007598 | CAP, ADENYLATE CYCLASE-ASSOCIATED PROTEIN 1 (YEAST)                                 | -2.4486  | 0.003417 |
| AK122493  | HYPOTHETICAL PROTEIN LOC268546                                                      | -2.4478  | 0.001344 |
| NM_018750 | RAS ASSOCIATION (RALGDS/AF-6) DOMAIN FAMILY 5                                       | -2.44334 | 0.002643 |
| NM_011045 | PROLIFERATING CELL NUCLEAR ANTIGEN                                                  | -2.44064 | 0.000347 |
| NM_021460 | LYSOSOMAL ACID LIPASE 1                                                             | -2.43842 | 0.007394 |
| NM_013610 | NINJURIN 1                                                                          | -2.43678 | 0.001528 |
| AK076109  | BETA-GLUCURONIDASE STRUCTURAL                                                       | -2.43024 | 0.001211 |
| BC060718  | RIKEN CDNA 2310050N11 GENE                                                          | -2.42974 | 0.00235  |
| NM_025813 | MAJOR FACILITATOR SUPERFAMILY DOMAIN CONTAINING 1                                   | -2.4287  | 0.001751 |
| NM_008466 | KARYOPHERIN (IMPORTIN) ALPHA 3                                                      | -2.42784 | 0.00046  |
| NM_013820 | HEXOKINASE 2                                                                        | -2.42744 | 0.001794 |
| BC058236  | VACUOLAR PROTEIN SORTING 26 (YEAST)                                                 | -2.42346 | 0.00316  |
| BC054521  | YEAST SPS1/STE20-RELATED KINASE 3 (S. CEREVISIAE)                                   | -2.42168 | 0.000598 |
| BC058234  | NIBAN PROTEIN                                                                       | -2.41992 | 0.006899 |
| NM_008528 | B-CELL LINKER                                                                       | -2.41912 | 0.002901 |
| BC014802  | ADENYLATE KINASE 1                                                                  | -2.41702 | 0.001985 |
| NM_011379 | SIGNAL-INDUCED PROLIFERATION ASSOCIATED GENE 1                                      | -2.41662 | 0.005823 |
| AK122406  | HUNTINGTIN INTERACTING PROTEIN 14                                                   | -2.41586 | 0.003927 |
| NM_027109 | DEOXYRIBONUCLEASE 1-LIKE 1                                                          | -2.41244 | 0.004342 |
| AK088090  | CDC42 SMALL EFFECTOR 2                                                              | -2.41176 | 0.000288 |
| U36758    | PROTEIN TYROSINE PHOSPHATASE, RECEPTOR TYPE, E                                      | -2.4097  | 0.000403 |
| NM_021524 | PRE-B-CELL COLONY-ENHANCING FACTOR 1                                                | -2.4078  | 0.001098 |
| NM_009955 | DIHYDROPYRIMIDINASE-LIKE 2                                                          | -2.40554 | 0.003243 |
| NM_010304 | GUANINE NUCLEOTIDE BINDING PROTEIN, ALPHA 15                                        | -2.40472 | 0.001933 |
| AK028811  | CYTOPLASMIC FMR1 INTERACTING PROTEIN 1                                              | -2.40268 | 0.000833 |
| AB093292  | FERM DOMAIN CONTAINING 4A                                                           | -2.40206 | 0.003269 |
| NM_175534 | MAS-RELATED GPR, MEMBER E                                                           | -2.3969  | 0.000747 |
| BC003786  | FC RECEPTOR, IGG, ALPHA CHAIN TRANSPORTER                                           | -2.39636 | 0.00271  |
| NM_011212 | PROTEIN TYROSINE PHOSPHATASE, RECEPTOR TYPE, E                                      | -2.3936  | 0.001592 |
| D87968    | PROTEIN TYROSINE PHOSPHATASE, NON-RECEPTOR TYPE SUBSTRATE 1                         | -2.39328 | 0.000431 |
| BC021393  | CUG TRIPLET REPEAT, RNA BINDING PROTEIN 1                                           | -2.38948 | 0.001134 |
| NM_007604 | CAPPING PROTEIN (ACTIN FILAMENT) MUSCLE Z-LINE, ALPHA 2                             | -2.38816 | 0.002078 |

|           |                                                                                                |          |          |
|-----------|------------------------------------------------------------------------------------------------|----------|----------|
| NM_009007 | RAS-RELATED C3 BOTULINUM SUBSTRATE 1                                                           | -2.38254 | 0.001401 |
| BC019491  | ANGIOPOIETIN-LIKE 3                                                                            | -2.37852 | 0.002674 |
| NM_016802 | RAS HOMOLOG GENE FAMILY, MEMBER A                                                              | -2.37312 | 0.000759 |
| BC043679  | SIGNAL-INDUCED PROLIFERATION ASSOCIATED GENE 1<br>SERINE PALMITOYLTRANSFERASE, LONG CHAIN BASE | -2.36954 | 0.002404 |
| AK080181  | SUBUNIT 2                                                                                      | -2.36834 | 3.22E-05 |
| AK008777  | ACTIN RELATED PROTEIN 2/3 COMPLEX, SUBUNIT 2                                                   | -2.36768 | 0.000371 |
| NM_024225 | SORTING NEXIN 5                                                                                | -2.35968 | 0.000167 |
| NM_013885 | CHLORIDE INTRACELLULAR CHANNEL 4 (MITOCHONDRIAL)                                               | -2.3512  | 0.000345 |
| NM_177366 | G PROTEIN-COUPLED RECEPTOR 157                                                                 | -2.3502  | 0.000243 |
| AK081613  | RAS-RELATED C3 BOTULINUM SUBSTRATE 1<br>SOLUTE CARRIER FAMILY 16 (MONOCARBOXYLIC ACID          | -2.34548 | 0.001501 |
| AK005699  | TRANSPORTERS), MEMBER 13                                                                       | -2.34504 | 0.000349 |
| M23109    | COAGULATION FACTOR IX                                                                          | -2.34194 | 0.002291 |
| AK029118  | RIKEN CDNA B430108F07 GENE                                                                     | -2.33948 | 1.86E-05 |
| AK088751  | RAS ASSOCIATION (RALGDS/AF-6) DOMAIN FAMILY 5                                                  | -2.33548 | 0.004069 |
| AK034298  | TRANSMEMBRANE PROTEIN 19                                                                       | -2.33536 | 0.000238 |
| BC050110  | SPINDLE ASSEMBLY 6 HOMOLOG (C. ELEGANS)                                                        | -2.33518 | 8.24E-05 |
| AK010947  | CELLULAR REPRESSOR OF E1A-STIMULATED GENES 1                                                   | -2.33496 | 0.006304 |
| AK028096  | VACUOLAR PROTEIN SORTING 26 (YEAST)                                                            | -2.32554 | 0.003249 |
| NM_009178 | ST3 BETA-GALACTOSIDE ALPHA-2,3-SIALYLTRANSFERASE 4                                             | -2.32186 | 0.002068 |
| AK085844  | CELLULAR REPRESSOR OF E1A-STIMULATED GENES 1                                                   | -2.32116 | 0.006416 |
| BC049105  | TRIPARTITE MOTIF-CONTAINING 35                                                                 | -2.32    | 0.000279 |
| AK041179  | RIKEN CDNA A430107D22 GENE                                                                     | -2.31972 | 0.003559 |
| NM_018821 | SUPPRESSOR OF CYTOKINE SIGNALING 6                                                             | -2.3181  | 0.002    |
| NM_007502 | ATPASE, NA+/K+ TRANSPORTING, BETA 3 POLYPEPTIDE                                                | -2.3167  | 0.000178 |
| NM_011604 | TOLL-LIKE RECEPTOR 6                                                                           | -2.31656 | 0.003942 |
| BC027370  | RIKEN CDNA B430108F07 GENE                                                                     | -2.31656 | 0.000842 |
| BC063265  | HYPOTHETICAL PROTEIN LOC268546                                                                 | -2.31226 | 0.000449 |
| BC023924  | PHYTOCERAMIDASE, ALKALINE                                                                      | -2.31168 | 0.000208 |
| AK040554  | RIKEN CDNA B430108F07 GENE                                                                     | -2.30904 | 0.000329 |
| NM_133672 | VACUOLAR PROTEIN SORTING 26 (YEAST)<br>EUKARYOTIC TRANSLATION INITIATION FACTOR 4E MEMBER      | -2.30258 | 0.004021 |
| NM_025829 | 3                                                                                              | -2.29862 | 0.004935 |
| NM_027285 | RIKEN CDNA 1700029I01 GENE                                                                     | -2.29456 | 0.004082 |
| BC043324  | RIKEN CDNA 2310015N21 GENE<br>SERINE PALMITOYLTRANSFERASE, LONG CHAIN BASE                     | -2.2939  | 9.62E-05 |
| NM_011479 | SUBUNIT 2                                                                                      | -2.28874 | 2.37E-05 |
| NM_198295 | THIOREDOXIN DOMAIN CONTAINING 10<br>TRANSMEMBRANE EMP24-LIKE TRAFFICKING PROTEIN 10            | -2.2844  | 0.000914 |
| BC006774  | (YEAST)                                                                                        | -2.28416 | 0.001081 |
| AK129051  | HYPOTHETICAL PROTEIN LOC216023<br>SOLUTE CARRIER FAMILY 16 (MONOCARBOXYLIC ACID                | -2.28018 | 0.001329 |
| NM_172371 | TRANSPORTERS), MEMBER 13                                                                       | -2.27728 | 0.000598 |



|             |                                                                                       |          |          |
|-------------|---------------------------------------------------------------------------------------|----------|----------|
| AK084199    | RIKEN CDNA D230007K08 GENE                                                            | -2.27436 | 0.000678 |
| NM_023647   | SERINE (OR CYSTEINE) PEPTIDASE INHIBITOR, CLADE B, MEMBER 9C                          | -2.27238 | 0.000104 |
| AK014153    | ARACHIDONATE 5-LIPOXYGENASE ACTIVATING PROTEIN                                        | -2.27226 | 0.000149 |
| BC011415    | SERINE (OR CYSTEINE) PEPTIDASE INHIBITOR, CLADE B, MEMBER 9C                          | -2.2713  | 0.001016 |
| NM_007952   | PROTEIN DISULFIDE ISOMERASE ASSOCIATED 3                                              | -2.26786 | 0.00153  |
| BC002000    | OPIOID RECEPTOR, SIGMA 1                                                              | -2.26732 | 0.000316 |
| NM_008608   | MATRIX METALLOPEPTIDASE 14 (MEMBRANE-INSERTED)                                        | -2.26632 | 0.000523 |
| NM_027935   | TRANSMEMBRANE PROTEIN 50A                                                             | -2.26524 | 0.004399 |
| BC060143    | ACTIN RELATED PROTEIN 2/3 COMPLEX, SUBUNIT 5                                          | -2.26294 | 0.000259 |
| NM_00100416 | N-ACETYLGLUCOSAMINE-1-PHOSPHATE TRANSFERASE, 4                                        | -2.25854 | 0.000789 |
| AK129097    | PHD FINGER PROTEIN 15                                                                 | -2.2579  | 0.001038 |
| BC019840    | FERRITIN LIGHT CHAIN 1                                                                | -2.25454 | 0.003565 |
| NM_177089   | TRANSFORMING, ACIDIC COILED-COIL CONTAINING PROTEIN 1                                 | -2.25238 | 0.000756 |
| NM_021876   | EMBRYONIC ECTODERM DEVELOPMENT TUMOR NECROSIS FACTOR (LIGAND) SUPERFAMILY, MEMBER 13B | -2.25236 | 0.003605 |
| AK034121    | MEMBER 13B                                                                            | -2.2475  | 0.000989 |
| NM_022324   | STROMAL CELL-DERIVED FACTOR 2-LIKE 1                                                  | -2.24724 | 0.00025  |
| NM_177372   | HYPOTHETICAL PROTEIN LOC216023                                                        | -2.24488 | 0.000859 |
| NM_011937   | GLUCOSAMINE-6-PHOSPHATE DEAMINASE 1                                                   | -2.24226 | 0.000257 |
| NM_198429   | NUCLEAR FACTOR OF ACTIVATED T-CELLS, CYTOPLASMIC, CALCINEURIN-DEPENDENT 1             | -2.24036 | 0.001618 |
| AY147002    | BACULOVIRAL IAP REPEAT-CONTAINING 1B                                                  | -2.2341  | 0.004618 |
| NM_030691   | IMMUNOGLOBULIN SUPERFAMILY, MEMBER 6                                                  | -2.23354 | 0.005536 |
| NM_009976   | CYSTATIN C                                                                            | -2.23302 | 0.000378 |
| AK077625    | GLUCOSAMINE-6-PHOSPHATE DEAMINASE 1                                                   | -2.2315  | 0.00044  |
| BC013468    | ARSENIC (+3 OXIDATION STATE) METHYLTRANSFERASE                                        | -2.23144 | 4.71E-05 |
| NM_023141   | TORSIN FAMILY 3, MEMBER A                                                             | -2.23136 | 0.000262 |
| BC051517    | COMM DOMAIN CONTAINING 8                                                              | -2.23106 | 0.000863 |
| NM_010160   | CUG TRIPLET REPEAT, RNA BINDING PROTEIN 2                                             | -2.23076 | 0.000477 |
| NM_134133   | RIKEN CDNA 2010002N04 GENE                                                            | -2.22966 | 0.002049 |
| NM_176860   | RIKEN CDNA 2810457I06 GENE                                                            | -2.22546 | 0.001818 |
| NM_181547   | NITRIC OXIDE SYNTHASE TRAFFICKER                                                      | -2.22474 | 0.003486 |
| AK042426    | TRANSMEMBRANE PROTEIN 19                                                              | -2.22058 | 0.000335 |
| NM_012054   | ACYLOXYACYL HYDROLASE                                                                 | -2.2168  | 0.001237 |
| NM_031165   | HEAT SHOCK PROTEIN 8                                                                  | -2.20514 | 0.000652 |
| BC049262    | ATPASE, CA <sup>++</sup> TRANSPORTING, PLASMA MEMBRANE 1                              | -2.2026  | 0.000933 |
| NM_175382   | RIKEN CDNA 2700049P18 GENE                                                            | -2.19928 | 0.005401 |
| NM_008875   | PHOSPHOLIPASE D1                                                                      | -2.199   | 0.005622 |
| AF145374    | TRIPARTITE MOTIF-CONTAINING 35                                                        | -2.19548 | 0.000518 |
| NM_007806   | CYTOCHROME B-245, ALPHA POLYPEPTIDE                                                   | -2.19468 | 7.66E-05 |

|             |                                                                                       |          |          |
|-------------|---------------------------------------------------------------------------------------|----------|----------|
| NM_022310   | HEAT SHOCK 70KD PROTEIN 5 (GLUCOSE-REGULATED PROTEIN)                                 | -2.19386 | 0.000595 |
| BC019962    | ZINC FINGER PROTEIN 275                                                               | -2.19028 | 5.24E-05 |
| NM_00100188 |                                                                                       |          |          |
| 1           | RIKEN CDNA 2510009E07 GENE                                                            | -2.1892  | 0.001751 |
| BC057606    | KELCH-LIKE 5 (DROSOPHILA)                                                             | -2.18002 | 0.000735 |
| NM_027209   | MEMBRANE-SPANNING 4-DOMAINS, SUBFAMILY A, MEMBER 6B                                   | -2.17296 | 0.002659 |
| NM_011816   | RIKEN CDNA E430034L04 GENE                                                            | -2.1726  | 0.001732 |
| AF090696    | CUG TRIPLET REPEAT, RNA BINDING PROTEIN 2                                             | -2.17206 | 0.000379 |
| AK052824    | TRANSMEMBRANE PROTEIN 77                                                              | -2.16548 | 0.000618 |
| NM_019955   | RECEPTOR-INTERACTING SERINE-THREONINE KINASE 3                                        | -2.16398 | 0.000653 |
| AK034772    | NMD3 HOMOLOG (S. CEREVISIAE)                                                          | -2.15962 | 0.000421 |
| NM_020577   | ARSENIC (+3 OXIDATION STATE) METHYLTRANSFERASE                                        | -2.15798 | 0.000462 |
| M28684      | HISTOCOMPATIBILITY 2, D REGION LOCUS 1                                                | -2.15692 | 0.002778 |
| NM_010240   | FERRITIN LIGHT CHAIN 1                                                                | -2.15644 | 0.003404 |
| NM_019553   | DEAD (ASP-GLU-ALA-ASP) BOX POLYPEPTIDE 21                                             | -2.155   | 0.001928 |
| NM_138594   | DNA SEGMENT, CHR 6, WAYNE STATE UNIVERSITY 163, EXPRESSED                             | -2.14912 | 0.000132 |
| NM_010191   | FARNESYL DIPHOSPHATE FARNESYL TRANSFERASE 1                                           | -2.14356 | 0.001164 |
| NM_026437   | RIKEN CDNA 1810055E12 GENE                                                            | -2.14076 | 0.001375 |
| BC054791    | CARNITINE PALMITOYLTRANSFERASE 1A, LIVER                                              | -2.13702 | 6.29E-05 |
| AF290973    | INTERFERON GAMMA INDUCIBLE PROTEIN 30                                                 | -2.1363  | 0.002477 |
| AK028220    | CD63 ANTIGEN                                                                          | -2.13592 | 8.54E-05 |
| M28684      | HISTOCOMPATIBILITY 2, Q REGION LOCUS 2                                                | -2.13112 | 0.00332  |
| NM_010557   | INTERLEUKIN 4 RECEPTOR, ALPHA                                                         | -2.12968 | 0.009188 |
| NM_026609   | LEPTIN RECEPTOR OVERLAPPING TRANSCRIPT-LIKE 1                                         | -2.12498 | 0.00138  |
| AK078062    | INTERLEUKIN-1 RECEPTOR-ASSOCIATED KINASE 2                                            | -2.12364 | 0.001337 |
| AK033680    | CORE-BINDING FACTOR, RUNT DOMAIN, ALPHA SUBUNIT 2, TRANSLOCATED TO, 3 HOMOLOG (HUMAN) | -2.12274 | 0.003377 |
| BC025182    | HYPOTHETICAL PROTEIN LOC216023                                                        | -2.11794 | 0.002158 |
| NM_016787   | BCL2/ADENOVIRUS E1B INTERACTING PROTEIN 1, NIP2                                       | -2.11636 | 0.000872 |
| BC040460    | DENN/MADD DOMAIN CONTAINING 4B                                                        | -2.11088 | 0.008594 |
| K01446      | HISTOCOMPATIBILITY 2, D REGION LOCUS 1                                                | -2.10804 | 0.003278 |
| NM_144908   | UDP-N-ACETYL-ALPHA-D-GALACTOSAMINE:POLYPEPTIDE N-ACETYL GALACTOSAMINYLTRANSFERASE 11  | -2.10612 | 0.000109 |
| NM_178610   | HIV-1 REV BINDING PROTEIN 2                                                           | -2.1041  | 0.001055 |
| NM_010392   | HISTOCOMPATIBILITY 2, D REGION LOCUS 1                                                | -2.10194 | 0.004361 |
| NM_022314   | TROPOMYOSIN 5                                                                         | -2.09706 | 0.001345 |
| NM_176840   | OXYSTEROL BINDING PROTEIN-LIKE 11                                                     | -2.09544 | 0.001936 |
| AK034348    | PROSTAGLANDIN E RECEPTOR 4 (SUBTYPE EP4)                                              | -2.09224 | 0.000225 |
| NM_053090   | DOWN-REGULATED BY CTNNB1, A                                                           | -2.09114 | 0.005219 |
| NM_007801   | CATHEPSIN H                                                                           | -2.08998 | 0.00113  |
| NM_007653   | CD63 ANTIGEN                                                                          | -2.08998 | 0.000117 |

|             |                                                                                              |          |          |
|-------------|----------------------------------------------------------------------------------------------|----------|----------|
| NM_009735   | BETA-2 MICROGLOBULIN                                                                         | -2.08814 | 0.000569 |
| BC012309    | INTERLEUKIN 4 RECEPTOR, ALPHA<br>AMYLOID BETA (A4) PRECURSOR PROTEIN-BINDING, FAMILY         | -2.08362 | 0.008336 |
| U70210      | B, MEMBER 2                                                                                  | -2.08198 | 0.000735 |
| AK008143    | PURINE-NUCLEOSIDE PHOSPHORYLASE                                                              | -2.08    | 0.000858 |
| AK078123    | DNA SEGMENT, CHR 5, ERATO DOI 371, EXPRESSED<br>TUMOR NECROSIS FACTOR (LIGAND) SUPERFAMILY,  | -2.07758 | 0.001501 |
| AK079180    | MEMBER 13B                                                                                   | -2.07296 | 0.010408 |
| NM_008163   | GROWTH FACTOR RECEPTOR BOUND PROTEIN 2                                                       | -2.06796 | 0.000253 |
| NM_175188   | MEMBRANE-ASSOCIATED RING FINGER (C3HC4) 1                                                    | -2.06742 | 0.002866 |
| BC058161    | CCAAT/ENHANCER BINDING PROTEIN (C/EBP), ALPHA                                                | -2.064   | 0.005245 |
| BC023427    | PLATELET DERIVED GROWTH FACTOR, B POLYPEPTIDE                                                | -2.0635  | 0.003031 |
| AK046079    | RIKEN CDNA 2900035H07 GENE                                                                   | -2.06222 | 0.002584 |
| AB033615    | PHOSPHOLIPASE C-LIKE 2                                                                       | -2.05846 | 0.000113 |
| AK009229    | N-ACETYLTRANSFERASE 5 (ARD1 HOMOLOG, S. CEREVISIAE)                                          | -2.05716 | 0.000878 |
| BC066809    | RIKEN CDNA 2900035H07 GENE                                                                   | -2.05604 | 0.00228  |
| AF017175    | CARNITINE PALMITOYLTRANSFERASE 1A, LIVER                                                     | -2.05426 | 8.37E-05 |
| NM_013477   | ATPASE, H+ TRANSPORTING, LYSOSOMAL V0 SUBUNIT D1                                             | -2.0515  | 0.000424 |
| BC060253    | RIKEN CDNA 5730494M16 GENE<br>MYRISTOYLATED ALANINE RICH PROTEIN KINASE C                    | -2.05034 | 0.008149 |
| NM_008538   | SUBSTRATE                                                                                    | -2.0491  | 0.001056 |
| NM_009861   | CELL DIVISION CYCLE 42 HOMOLOG (S. CEREVISIAE)                                               | -2.04528 | 0.000313 |
| NM_023409   | NIEMANN PICK TYPE C2                                                                         | -2.04514 | 0.001054 |
| BC056473    | NANOS HOMOLOG 1 (DROSOPHILA)                                                                 | -2.04422 | 0.001548 |
| AK041324    | RIKEN CDNA A630001G21 GENE                                                                   | -2.04196 | 0.001335 |
| NM_007393   | ACTIN, BETA, CYTOPLASMIC                                                                     | -2.03716 | 0.000873 |
| BC050939    | ATPASE, H+ TRANSPORTING, LYSOSOMAL V0 SUBUNIT C                                              | -2.03222 | 9.19E-05 |
| NM_00100390 | 8<br>CLATHRIN, HEAVY POLYPEPTIDE (HC)<br>AMYLOID BETA (A4) PRECURSOR PROTEIN-BINDING, FAMILY | -2.0322  | 0.003331 |
| AF133665    | B, MEMBER 2                                                                                  | -2.02912 | 0.001998 |
| AK036489    | MEMBRANE-ASSOCIATED RING FINGER (C3HC4) 1                                                    | -2.02714 | 0.003135 |
| NM_009729   | ATPASE, H+ TRANSPORTING, LYSOSOMAL V0 SUBUNIT C                                              | -2.02522 | 0.000249 |
| BC058274    | WD REPEAT AND FYVE DOMAIN CONTAINING 3<br>GROWTH FACTOR RECEPTOR BOUND PROTEIN 2-            | -2.02484 | 0.003456 |
| NM_181584   | ASSOCIATED PROTEIN 3                                                                         | -2.0204  | 0.003853 |
| NM_133869   | CHOLINE/ETHANOLAMINEPHOSPHOTRANSFERASE 1                                                     | -2.01166 | 0.00235  |
| AF089751    | PURINERGIC RECEPTOR P2X, LIGAND-GATED ION CHANNEL 4                                          | -2.01146 | 0.001926 |
| NM_133787   | NMD3 HOMOLOG (S. CEREVISIAE)                                                                 | -2.0097  | 0.001272 |
| BC033382    | RAS RELATED PROTEIN 1B                                                                       | -2.00742 | 0.002117 |
| BC031464    | TRAFFICKING PROTEIN PARTICLE COMPLEX 6B                                                      | -2.00568 | 0.001187 |
| AF172088    | ADP-RIBOSYLATION FACTOR-LIKE 6 INTERACTING PROTEIN 1                                         | -2.0034  | 0.000649 |
| AK090001    | ADP-RIBOSYLATION FACTOR-LIKE 6 INTERACTING PROTEIN 1                                         | -2.00014 | 0.000161 |
| AK088577    | CDNA SEQUENCE X99384                                                                         | -1.99866 | 0.001756 |

|           |                                                                          |          |          |
|-----------|--------------------------------------------------------------------------|----------|----------|
| U49950    | YEAST SPS1/STE20-RELATED KINASE 3 (S. CEREVISIAE)                        | -1.99322 | 0.000636 |
| NM_134100 | DNA SEGMENT, CHR 15, MOUSE GENOME INFORMATICS 27                         | -1.99172 | 0.003255 |
| NM_194344 | SH3 DOMAIN AND TETRATRICOPEPTIDE REPEATS 1                               | -1.99154 | 0.002031 |
| NM_011633 | TNF RECEPTOR-ASSOCIATED FACTOR 5                                         | -1.9907  | 0.002863 |
| NM_021389 | SH3-DOMAIN KINASE BINDING PROTEIN 1                                      | -1.98976 | 0.006181 |
| AK052291  | ATP-BINDING CASSETTE, SUB-FAMILY C (CFTR/MRP), MEMBER 9                  | -1.98894 | 0.001474 |
| NM_008199 | HISTOCOMPATIBILITY 2, BLASTOCYST                                         | -1.97768 | 0.005795 |
| NM_175675 | RIKEN CDNA 4930471M23 GENE                                               | -1.97678 | 0.000663 |
| NM_019909 | HISTOCOMPATIBILITY 2, Q REGION LOCUS 1                                   | -1.97256 | 0.005435 |
| AF279672  | TRANSIENT RECEPTOR POTENTIAL CATION CHANNEL, SUBFAMILY V, MEMBER 4       | -1.97184 | 0.000897 |
| AB093277  | WD REPEAT AND FYVE DOMAIN CONTAINING 3                                   | -1.97138 | 0.00384  |
| NM_025277 | GUANINE NUCLEOTIDE BINDING PROTEIN (G PROTEIN), GAMMA 10                 | -1.96804 | 0.000417 |
| NM_172714 | EXPRESSED SEQUENCE AI461788                                              | -1.96778 | 0.004956 |
| NM_021540 | RING FINGER PROTEIN 130                                                  | -1.9655  | 0.000727 |
| NM_008633 | MICROTUBULE-ASSOCIATED PROTEIN 4                                         | -1.96258 | 0.000787 |
| AK013963  | LYSOSOMAL-ASSOCIATED PROTEIN TRANSMEMBRANE 4A                            | -1.95876 | 0.000946 |
| NM_178593 | RCSD DOMAIN CONTAINING 1                                                 | -1.95448 | 0.001924 |
| AK078662  | RIKEN CDNA E330016A19 GENE                                               | -1.95412 | 0.001263 |
| NM_053075 | RAS-HOMOLOG ENRICHED IN BRAIN                                            | -1.95354 | 0.000547 |
| AF061260  | IMMUNOGLOBULIN SUPERFAMILY, MEMBER 4A                                    | -1.95214 | 0.000674 |
| NM_010508 | INTERFERON (ALPHA AND BETA) RECEPTOR 1                                   | -1.95082 | 0.004015 |
| NM_010658 | V-MAF MUSCULOAPONEUROTIC FIBROSARCOMA ONCOGENE FAMILY, PROTEIN B (AVIAN) | -1.9428  | 0.004715 |
| NM_020258 | SOLUTE CARRIER FAMILY 37 (GLYCEROL-3-PHOSPHATE TRANSPORTER), MEMBER 2    | -1.93636 | 0.000783 |
| NM_021284 | V-KI-RAS2 KIRSTEN RAT SARCOMA VIRAL ONCOGENE HOMOLOG                     | -1.93266 | 0.000345 |
| NM_175181 | RIKEN CDNA 2600010E01 GENE                                               | -1.931   | 0.003016 |
| BC019448  | NUCLEAR RECEPTOR BINDING FACTOR 2 PSEUDOGENE                             | -1.92812 | 0.00129  |
| NM_033617 | ATPASE, H <sup>+</sup> TRANSPORTING, LYSOSOMAL V0 SUBUNIT C''            | -1.927   | 0.000574 |
| BC019374  | GLUTAMATE-CYSTEINE LIGASE, CATALYTIC SUBUNIT                             | -1.92234 | 0.002409 |
| AK031291  | DPY-19-LIKE 1 (C. ELEGANS)                                               | -1.92146 | 0.000178 |
| NM_009455 | UBIQUITIN-CONJUGATING ENZYME E2E 1, UBC4/5 HOMOLOG (YEAST)               | -1.91836 | 0.0047   |
| BC049274  | UBIQUITIN SPECIFIC PEPTIDASE 12                                          | -1.9173  | 0.002696 |
| BC067412  | PHOSPHOGLYCERATE MUTASE 1                                                | -1.91166 | 0.000624 |
| NM_011779 | CORONIN, ACTIN BINDING PROTEIN 1C                                        | -1.90488 | 0.001233 |
| AK046516  | HYPOTHETICAL PROTEIN B330003H21                                          | -1.9048  | 0.001362 |
| BC049972  | DENN/MADD DOMAIN CONTAINING 4B                                           | -1.90388 | 0.008707 |
| BC046440  | HYPOTHETICAL PROTEIN LOC269471                                           | -1.9019  | 0.001898 |
| NM_145554 | LOW DENSITY LIPOPROTEIN RECEPTOR ADAPTOR PROTEIN 1                       | -1.89886 | 0.003689 |

|           |                                                                                           |          |          |
|-----------|-------------------------------------------------------------------------------------------|----------|----------|
| NM_021884 | TUMOR SUSCEPTIBILITY GENE 101                                                             | -1.89852 | 0.004132 |
| NM_172498 | PTK2 PROTEIN TYROSINE KINASE 2 BETA                                                       | -1.89504 | 0.003991 |
| AK079611  | HYPOTHETICAL PROTEIN MGC30586                                                             | -1.89484 | 0.000241 |
| NM_019566 | RAS HOMOLOG GENE FAMILY, MEMBER G<br>SOLUTE CARRIER FAMILY 4, SODIUM BICARBONATE          | -1.893   | 0.001112 |
| AK049322  | COTRANSPORTER, MEMBER 7                                                                   | -1.88932 | 0.003919 |
| AK079062  | RIKEN CDNA 2310057D15 GENE                                                                | -1.88832 | 0.000554 |
| NM_019661 | RIKEN CDNA 0610042I15 GENE                                                                | -1.8814  | 0.003083 |
| BC055398  | UBIQUITIN SPECIFIC PEPTIDASE 12                                                           | -1.8749  | 0.001555 |
| NM_172839 | CYCLIN J                                                                                  | -1.87442 | 4.58E-05 |
| NM_153509 | CDNA SEQUENCE AF529169<br>UDP-GAL:BETAGAL BETA 1,3-GALACTOSYLTRANSFERASE                  | -1.87434 | 0.001022 |
| NM_146184 | POLYPEPTIDE 7                                                                             | -1.87336 | 0.008659 |
| NM_030717 | LACTAMASE, BETA                                                                           | -1.8712  | 0.00025  |
| AK009391  | DIHYDROURIDINE SYNTHASE 2-LIKE (SMM1, S. CEREVISIAE)                                      | -1.86748 | 3.24E-05 |
| NM_026998 | SORTING NEXIN 6                                                                           | -1.84644 | 0.002091 |
| NM_026738 | RIKEN CDNA 1110007C09 GENE                                                                | -1.8457  | 0.002457 |
| AY048852  | TUMOR PROTEIN D52                                                                         | -1.84562 | 0.00134  |
| BC024909  | SH3 DOMAIN AND TETRATRICOPEPTIDE REPEATS 1                                                | -1.84368 | 0.000281 |
| NM_145376 | RIKEN CDNA 2900035H07 GENE                                                                | -1.83898 | 0.000679 |
| AK047427  | BROMODOMAIN ADJACENT TO ZINC FINGER DOMAIN 1A                                             | -1.83018 | 0.000422 |
| AK011178  | RIKEN CDNA 2600010E01 GENE                                                                | -1.82972 | 0.006992 |
| NM_011669 | UBIQUITIN SPECIFIC PEPTIDASE 12                                                           | -1.82804 | 0.00464  |
| NM_019460 | SCM-LIKE WITH FOUR MBT DOMAINS 1                                                          | -1.82436 | 0.000779 |
| NM_023065 | INTERFERON GAMMA INDUCIBLE PROTEIN 30<br>MACROPHAGE GALACTOSE N-ACETYL-GALACTOSAMINE      | -1.82188 | 0.00045  |
| NM_010796 | SPECIFIC LECTIN 1<br>COLONY STIMULATING FACTOR 2 RECEPTOR, ALPHA, LOW-                    | -1.81994 | 0.002685 |
| NM_009970 | AFFINITY (GRANULOCYTE-MACROPHAGE)                                                         | -1.81316 | 0.001274 |
| BC046424  | DNAJ (HSP40) HOMOLOG, SUBFAMILY C, MEMBER 16                                              | -1.81112 | 0.002373 |
| NM_177617 |                                                                                           | -1.80658 | 0.005954 |
| NM_026697 | RAB14, MEMBER RAS ONCOGENE FAMILY                                                         | -1.80478 | 0.000318 |
| NM_025547 | MTERF DOMAIN CONTAINING 1                                                                 | -1.79064 | 0.002448 |
| AK075744  | TRANSMEMBRANE PROTEIN 66                                                                  | -1.78712 | 0.000156 |
| BC019448  | NUCLEAR RECEPTOR BINDING FACTOR 2 PSEUDOGENE<br>PANTOTHENATE KINASE 2 (HALLERVORDEN-SPATZ | -1.77786 | 0.001462 |
| NM_153501 | SYNDROME)                                                                                 | -1.7776  | 0.003304 |
| BC003996  | RIKEN CDNA 1810021C21 GENE                                                                | -1.77754 | 0.000388 |
| NM_178719 | EXPRESSED SEQUENCE AI452372                                                               | -1.77522 | 0.00255  |
| NM_017375 | OSTEOCLAST STIMULATING FACTOR 1                                                           | -1.76986 | 0.001554 |
| BC019809  | LEUCINE RICH REPEAT CONTAINING 8 FAMILY, MEMBER C                                         | -1.76658 | 0.002055 |
| AB093293  | TBC1 DOMAIN FAMILY, MEMBER 14                                                             | -1.76484 | 0.001943 |
| NM_012051 | ETS VARIANT GENE 3                                                                        | -1.76436 | 0.005006 |
| AK003446  | ATPASE, H+ TRANSPORTING, LYSOSOMAL V1 SUBUNIT D                                           | -1.7625  | 0.000607 |

|           |                                                                                                              |          |          |
|-----------|--------------------------------------------------------------------------------------------------------------|----------|----------|
| BC055295  | DEDICATOR OF CYTOKINESIS 8                                                                                   | -1.75738 | 0.002063 |
| NM_175562 | RAB39, MEMBER RAS ONCOGENE FAMILY<br>MOB1, MPS ONE BINDER KINASE ACTIVATOR-LIKE 1B<br>(YEAST)                | -1.7478  | 0.003481 |
| BC011285  | SORTING NEXIN ASSOCIATED GOLGI PROTEIN 1                                                                     | -1.74672 | 0.002081 |
| NM_130796 | B-CELL RECEPTOR-ASSOCIATED PROTEIN 31                                                                        | -1.74642 | 0.000449 |
| NM_012060 | Y BOX PROTEIN 1                                                                                              | -1.73386 | 0.002236 |
| AF038994  | ACTIN, BETA, CYTOPLASMIC                                                                                     | -1.72516 | 0.004844 |
| AB028847  | TRANSMEMBRANE PROTEIN 14C                                                                                    | -1.71674 | 0.003323 |
| AK089021  | DNAJ (HSP40) HOMOLOG, SUBFAMILY C, MEMBER 16                                                                 | -1.71366 | 0.003458 |
| AK122407  | PEROXIREDOXIN 1                                                                                              | -1.71346 | 0.000859 |
| NM_011034 | GROWTH FACTOR RECEPTOR BOUND PROTEIN 2                                                                       | -1.71144 | 0.009309 |
| NM_008163 | 1-ACYLGLYCEROL-3-PHOSPHATE O-ACYLTRANSFERASE 1<br>(LYSOPHOSPHATIDIC ACID ACYLTRANSFERASE, DELTA)             | -1.7098  | 0.002415 |
| NM_026644 | THYMOSIN, BETA 4, X CHROMOSOME                                                                               | -1.7089  | 0.000384 |
| NM_021278 | TUMOR NECROSIS FACTOR RECEPTOR SUPERFAMILY,<br>MEMBER 1B                                                     | -1.70874 | 0.002182 |
| M59378    | PR DOMAIN CONTAINING 1, WITH ZNF DOMAIN<br>PROTEIN KINASE INHIBITOR BETA, CAMP DEPENDENT,<br>TESTIS SPECIFIC | -1.7075  | 0.005338 |
| NM_007548 | SPASTIC PARAPLEGIA 21 HOMOLOG (HUMAN)                                                                        | -1.70724 | 0.006762 |
| NM_008863 | LECTIN, GALACTOSE BINDING, SOLUBLE 1                                                                         | -1.70498 | 0.000168 |
| NM_138584 | AUTOCRINE MOTILITY FACTOR RECEPTOR                                                                           | -1.70398 | 7.54E-05 |
| AK004298  | TISSUE FACTOR PATHWAY INHIBITOR                                                                              | -1.70226 | 0.001421 |
| NM_011787 | RIKEN CDNA A930008A22 GENE                                                                                   | -1.70222 | 0.008018 |
| AF016313  | SOLUTE CARRIER FAMILY 9 (SODIUM/HYDROGEN<br>EXCHANGER), ISOFORM 7                                            | -1.70218 | 0.004357 |
| NM_172768 | MORTALITY FACTOR 4 LIKE 1                                                                                    | -1.69804 | 0.003513 |
| NM_177353 | RIKEN CDNA 6530401C20 GENE                                                                                   | -1.69748 | 0.005781 |
| AK079115  | RHO GTPASE ACTIVATING PROTEIN 9                                                                              | -1.69708 | 0.000268 |
| NM_173405 | TRIPTEPTIDYL PEPTIDASE II                                                                                    | -1.6957  | 0.003993 |
| BC021754  | SOLUTE CARRIER FAMILY 45, MEMBER 4                                                                           | -1.6954  | 0.002364 |
| NM_009418 | LECTIN, GALACTOSE BINDING, SOLUBLE 1                                                                         | -1.6881  | 0.006952 |
| BC058722  | LECTIN, GALACTOSE BINDING, SOLUBLE 1                                                                         | -1.68786 | 0.001967 |
| AK004298  | LECTIN, GALACTOSE BINDING, SOLUBLE 1                                                                         | -1.68696 | 0.000685 |
| AK004298  | MYELOID CELL LEUKEMIA SEQUENCE 1                                                                             | -1.68696 | 0.000685 |
| AK010424  | RIKEN CDNA 6030405P19 GENE                                                                                   | -1.68486 | 0.001751 |
| AK050695  | MORTALITY FACTOR 4 LIKE 1                                                                                    | -1.68376 | 0.002415 |
| AK079115  | CALRETICULIN                                                                                                 | -1.68104 | 7.16E-05 |
| X56603    | HISTOCOMPATIBILITY 2, D REGION LOCUS 1                                                                       | -1.68074 | 0.002786 |
| M12185    | DNAJ (HSP40) HOMOLOG, SUBFAMILY B, MEMBER 11                                                                 | -1.67786 | 0.002802 |
| NM_026400 | RIKEN CDNA 4930583H14 GENE                                                                                   | -1.67784 | 0.001512 |
| BC022740  | DYSTROBREVIN BINDING PROTEIN 1                                                                               | -1.67622 | 0.001457 |
| AK010924  | MITOGEN-ACTIVATED PROTEIN KINASE KINASE 1                                                                    | -1.67342 | 0.00042  |
| NM_019920 | INTERACTING PROTEIN 1                                                                                        | -1.6729  | 0.001879 |

|           |                                                                                          |          |          |
|-----------|------------------------------------------------------------------------------------------|----------|----------|
| AK044728  | RIKEN CDNA A930037G23 GENE                                                               | -1.67228 | 0.002591 |
| NM_145514 | WD REPEAT DOMAIN 26                                                                      | -1.6702  | 0.000389 |
| BC057601  | RIKEN CDNA A930037G23 GENE                                                               | -1.66748 | 0.005102 |
| NM_133838 | EH-DOMAIN CONTAINING 4                                                                   | -1.66646 | 0.000152 |
| NM_026381 | SCOTIN GENE                                                                              | -1.66484 | 0.00282  |
| AK129087  | PLEIOMORPHIC ADENOMA GENE-LIKE 2                                                         | -1.6636  | 0.000872 |
| NM_008668 | NGFI-A BINDING PROTEIN 2                                                                 | -1.66204 | 0.00133  |
| NM_013736 | TRANSCRIPTION ELONGATION FACTOR B (SIII), POLYPEPTIDE 3                                  | -1.6612  | 0.000915 |
| NM_017472 | SORTING NEXIN 3                                                                          | -1.65764 | 0.006298 |
| NM_011908 | UBIQUITIN-LIKE 3                                                                         | -1.6565  | 0.00302  |
| BC053524  | IMPORTIN 7                                                                               | -1.6526  | 0.001604 |
| NM_172827 | LEUCYL/CYSTINYL AMINOPEPTIDASE                                                           | -1.65136 | 0.000108 |
| NM_009615 | A DISINTEGRIN AND METALLOPEPTIDASE DOMAIN 17                                             | -1.64756 | 0.000651 |
| AK077305  | ODD OZ/TEN-M HOMOLOG 4 (DROSOPHILA)                                                      | -1.6467  | 8.38E-05 |
| NM_018804 | SYNAPTOTAGMIN 11                                                                         | -1.6427  | 0.006975 |
| NM_025968 | LEUKOTRIENE B4 12-HYDROXYDEHYDROGENASE                                                   | -1.63622 | 0.000434 |
| AF038994  | Y BOX PROTEIN 1                                                                          | -1.63616 | 0.00525  |
| NM_009579 | SOLUTE CARRIER FAMILY 30 (ZINC TRANSPORTER), MEMBER 1                                    | -1.6267  | 0.010695 |
| U60969    | FORMIN 1                                                                                 | -1.61774 | 0.003648 |
| U47325    | HISTOCOMPATIBILITY 2, D REGION LOCUS 1                                                   | -1.61734 | 0.004008 |
| AK129123  | RAL GUANINE NUCLEOTIDE EXCHANGE FACTOR RALGPS1A                                          | -1.61606 | 0.000957 |
| BC023409  | HISTOCOMPATIBILITY 2, D REGION LOCUS 1                                                   | -1.60926 | 0.003396 |
| BC049227  | SPLICING FACTOR PROLINE/GLUTAMINE RICH (POLYPYRIMIDINE TRACT BINDING PROTEIN ASSOCIATED) | -1.60906 | 0.001693 |
| AK077081  | TBC1 DOMAIN FAMILY, MEMBER 9                                                             | -1.60884 | 0.004319 |
| AF024519  | TSC22 DOMAIN FAMILY 3                                                                    | -1.60742 | 0.002037 |
| NM_007387 | ACID PHOSPHATASE 2, LYSOSOMAL                                                            | -1.60688 | 0.001732 |
| AK129229  | RIKEN CDNA 1700126I16 GENE                                                               | -1.6049  | 0.003898 |
| NM_181732 | RIKEN CDNA 2610208M17 GENE                                                               | -1.6044  | 0.000272 |
| NM_016681 | CHK2 CHECKPOINT HOMOLOG (S. POMBE)                                                       | -1.60132 | 0.003352 |
| AK014561  | PALMITOYL-PROTEIN THIOESTERASE 1                                                         | -1.60128 | 0.003114 |
| U27014    | SORBITOL DEHYDROGENASE                                                                   | -1.59776 | 0.001181 |
| NM_025356 | UBIQUITIN-CONJUGATING ENZYME E2D 3 (UBC4/5 HOMOLOG, YEAST)                               | -1.59266 | 0.002215 |
| NM_178787 | RIKEN CDNA A930037G23 GENE                                                               | -1.57734 | 0.001792 |
| AK086624  | DELTEX 4 HOMOLOG (DROSOPHILA)                                                            | -1.57032 | 8.4E-06  |
| NM_022813 | SECRETORY CARRIER MEMBRANE PROTEIN 2                                                     | -1.56066 | 0.000628 |
| NM_138315 | MICROTUBULE ASSOCIATED MONOOXYGENASE, CALPONIN AND LIM DOMAIN CONTAINING 1               | -1.56016 | 0.001073 |
| AK079115  | LIM DOMAIN CONTAINING PREFERRED TRANSLOCATION PARTNER IN LIPOMA                          | -1.55512 | 0.000208 |
| NM_011695 | VOLTAGE-DEPENDENT ANION CHANNEL 2                                                        | -1.54952 | 0.001071 |

|           |                                                                                                                                        |          |          |
|-----------|----------------------------------------------------------------------------------------------------------------------------------------|----------|----------|
| BC027342  | CDNA SEQUENCE BC027342                                                                                                                 | -1.54792 | 0.001492 |
| AK015255  | TUBULIN, BETA 6<br>SPLICING FACTOR PROLINE/GLUTAMINE RICH<br>(POLYPYRIMIDINE TRACT BINDING PROTEIN ASSOCIATED)                         | -1.54672 | 0.004659 |
| BC055468  | (POLYPYRIMIDINE TRACT BINDING PROTEIN ASSOCIATED)                                                                                      | -1.54464 | 0.001487 |
| AK033089  | NUCLEAR RECEPTOR COACTIVATOR 6 INTERACTING PROTEIN<br>CEROID LIPOFUSCINOSIS, NEURONAL 3, JUVENILE (BATTEN,<br>SPIELMEYER-VOGT DISEASE) | -1.53864 | 0.00361  |
| NM_009907 | SPIELMEYER-VOGT DISEASE)                                                                                                               | -1.52786 | 0.003305 |
| BC006897  | EXPRESSED SEQUENCE AI606441                                                                                                            | -1.52676 | 0.003264 |
| AK050665  | TROPOMYOSIN 5<br>SOLUTE CARRIER FAMILY 25 (MITOCHONDRIAL CARRIER,<br>PHOSPHATE CARRIER), MEMBER 3                                      | -1.5229  | 0.000192 |
| NM_133668 | PHOSPHATE CARRIER), MEMBER 3                                                                                                           | -1.51882 | 0.000992 |
| NM_146258 | SEROLOGICALLY DEFINED COLON CANCER ANTIGEN 13                                                                                          | -1.51782 | 0.002131 |
| AK090139  | HYPOTHETICAL PROTEIN 4932422C22                                                                                                        | -1.51474 | 0.001855 |
| AY062008  | 3-PHOSPHOINOSITIDE DEPENDENT PROTEIN KINASE-1                                                                                          | -1.50406 | 0.006303 |
| AK009340  | RIKEN CDNA 2310014H01 GENE                                                                                                             | -1.50132 | 0.000327 |
| AK037889  | ER DEGRADATION ENHANCER, MANNOSIDASE ALPHA-LIKE 1                                                                                      | -1.5004  | 0.003431 |
| NM_146126 | SORBITOL DEHYDROGENASE                                                                                                                 | -1.4992  | 0.000917 |
| BC032282  | FLIGHTLESS I HOMOLOG (DROSOPHILA)                                                                                                      | -1.49248 | 0.000447 |
| AK088560  | ROD1 REGULATOR OF DIFFERENTIATION 1 (S. POMBE)                                                                                         | -1.4861  | 0.000636 |
| BC058078  | EXPRESSED SEQUENCE AI606441                                                                                                            | -1.48478 | 0.002784 |
| NM_008556 | MAMMARY TRANSFORMING GENE 1                                                                                                            | -1.48304 | 0.002255 |
| NM_026635 | RIKEN CDNA 5730536A07 GENE                                                                                                             | -1.4816  | 0.002761 |
| AK004601  | INOSITOL POLYPHOSPHATE-5-PHOSPHATASE B                                                                                                 | -1.47566 | 0.002695 |
| BC028872  | RAB24, MEMBER RAS ONCOGENE FAMILY                                                                                                      | -1.4728  | 0.002724 |
| BC057180  | ATPASE, CA++ TRANSPORTING, PLASMA MEMBRANE 1                                                                                           | -1.47118 | 0.001553 |
| BC025099  | TUDOR DOMAIN CONTAINING 7<br>UDP-N-ACTEYLGLUCOSAMINE PYROPHOSPHORYLASE 1-LIKE<br>1                                                     | -1.47074 | 0.000856 |
| BC068207  | 1                                                                                                                                      | -1.46426 | 0.001117 |
| NM_027113 | WD REPEAT DOMAIN 5B<br>ALDO-KETO REDUCTASE FAMILY 1, MEMBER A4 (ALDEHYDE<br>REDUCTASE)                                                 | -1.46226 | 0.001617 |
| NM_021473 | REDUCTASE)                                                                                                                             | -1.45708 | 0.000393 |
| NM_145624 | ZINC FINGER PROTEIN 709                                                                                                                | -1.44694 | 0.00216  |
| NM_026998 | SORTING NEXIN 6                                                                                                                        | -1.44256 | 0.003196 |
| AK089070  | MAMMARY TRANSFORMING GENE 1                                                                                                            | -1.44222 | 0.0004   |
| AK004722  | INOSITOL POLYPHOSPHATE-5-PHOSPHATASE B                                                                                                 | -1.4406  | 0.001316 |
| NM_178376 | RAS-RELATED GTP BINDING A<br>SOLUTE CARRIER FAMILY 29 (NUCLEOSIDE TRANSPORTERS),<br>MEMBER 3                                           | -1.4389  | 0.002826 |
| NM_023596 | MEMBER 3                                                                                                                               | -1.43644 | 0.001192 |
| BC050039  | WD REPEAT DOMAIN 67                                                                                                                    | -1.43408 | 0.003546 |
| AK005004  | RAB7, MEMBER RAS ONCOGENE FAMILY<br>GUANOSINE DIPHOSPHATE (GDP) DISSOCIATION INHIBITOR<br>2                                            | -1.43018 | 0.000966 |
| NM_008112 | 2                                                                                                                                      | -1.42894 | 0.006117 |
| NM_026446 | REGULATOR OF G-PROTEIN SIGNALING 19                                                                                                    | -1.42696 | 0.003103 |
| AK011719  | RIKEN CDNA 2610039C10 GENE                                                                                                             | -1.42672 | 0.000722 |



|           |                                                                                                                        |          |          |
|-----------|------------------------------------------------------------------------------------------------------------------------|----------|----------|
| NM_009288 | SERINE/THREONINE KINASE 10                                                                                             | -1.42588 | 0.003233 |
| NM_027769 | COPINE III                                                                                                             | -1.42116 | 0.004857 |
| AK042787  | THIOREDOXIN DOMAIN CONTAINING 10                                                                                       | -1.41616 | 0.000199 |
| X64070    | MANNOSE-6-PHOSPHATE RECEPTOR, CATION DEPENDENT                                                                         | -1.41218 | 0.003681 |
| NM_144915 | RIKEN CDNA E330036I19 GENE                                                                                             | -1.41216 | 0.00216  |
| BC052027  | DNAJ (HSP40) HOMOLOG, SUBFAMILY C, MEMBER 2                                                                            | -1.40856 | 0.003455 |
| NM_018788 | EXOSTOSES (MULTIPLE)-LIKE 3                                                                                            | -1.40768 | 0.001554 |
| NM_013660 | SEMA DOMAIN, IMMUNOGLOBULIN DOMAIN (IG),<br>TRANSMEMBRANE DOMAIN (TM) AND SHORT<br>CYTOPLASMIC DOMAIN, (SEMAPHORIN) 4D | -1.4047  | 0.002668 |
| NM_175185 | HYDROXYSTEROID DEHYDROGENASE LIKE 1                                                                                    | -1.40206 | 0.003613 |
| AK075982  | RNA BINDING MOTIF PROTEIN 13                                                                                           | -1.39788 | 0.001148 |
| NM_181470 | LTV1 HOMOLOG (S. CEREVISIAE)                                                                                           | -1.39114 | 0.001313 |
| NM_025991 | KELCH REPEAT AND BTB (POZ) DOMAIN CONTAINING 4                                                                         | -1.38778 | 6.8E-06  |
| NM_175509 | RIKEN CDNA 9430067K14 GENE                                                                                             | -1.38348 | 0.002019 |
| AK129486  | VACUOLAR PROTEIN SORTING 13C (YEAST)                                                                                   | -1.38346 | 0.005141 |
| BC030869  | PHOSPHOGLUCOMUTASE 1                                                                                                   | -1.37816 | 0.002196 |
| NM_145933 | BETA GALACTOSIDE ALPHA 2,6 SIALYLTRANSFERASE 1<br>MICROTUBULE-ASSOCIATED PROTEIN, RP/EB FAMILY,<br>MEMBER 1            | -1.37522 | 0.004835 |
| BC052405  |                                                                                                                        | -1.37356 | 0.002724 |
| AK077791  | ROD1 REGULATOR OF DIFFERENTIATION 1 (S. POMBE)                                                                         | -1.37018 | 0.009559 |
| NM_009222 | SYNAPTOSOMAL-ASSOCIATED PROTEIN 23                                                                                     | -1.36166 | 0.00219  |
| NM_146115 | RIKEN CDNA A830007P12 GENE                                                                                             | -1.3578  | 0.000614 |
| BC013450  | Y BOX PROTEIN 1                                                                                                        | -1.35676 | 0.007665 |
| NM_029565 | TRANSMEMBRANE PROTEIN 59                                                                                               | -1.34682 | 0.000636 |
| NM_027569 | SPERM ASSOCIATED ANTIGEN 9                                                                                             | -1.34242 | 5.23E-05 |
| BC060100  | SPERM ASSOCIATED ANTIGEN 9                                                                                             | -1.33998 | 0.000622 |
| AK012307  | PRENYL (SOLANESYL) DIPHOSPHATE SYNTHASE, SUBUNIT 1                                                                     | -1.33872 | 0.005128 |
| NM_020611 | STEROID 5 ALPHA-REDUCTASE 2-LIKE                                                                                       | -1.32922 | 0.001122 |
| NM_146243 | ARP2 ACTIN-RELATED PROTEIN 2 HOMOLOG (YEAST)                                                                           | -1.3214  | 0.00277  |
| BC037615  | RAS-RELATED GTP BINDING A                                                                                              | -1.32104 | 0.000551 |
| NM_145221 | RIKEN CDNA 2900057D21 GENE                                                                                             | -1.31588 | 0.004392 |
| AK085828  | INTEGRIN BETA 1 (FIBRONECTIN RECEPTOR BETA)                                                                            | -1.31378 | 0.004475 |
| NM_010758 | MYELIN-ASSOCIATED GLYCOPROTEIN                                                                                         | -1.29296 | 0.003229 |
| AK030427  | GOLGI ASSOCIATED PDZ AND COILED-COIL MOTIF<br>CONTAINING                                                               | -1.28794 | 0.004231 |
| NM_016809 | RNA BINDING MOTIF PROTEIN 3                                                                                            | -1.28688 | 0.001777 |
| NM_027274 | RIKEN CDNA 2810025M15 GENE                                                                                             | -1.28066 | 0.001189 |
| BC047530  | ARP2 ACTIN-RELATED PROTEIN 2 HOMOLOG (YEAST)                                                                           | -1.27776 | 0.002782 |
| AK014534  | RIKEN CDNA 4631424J17 GENE                                                                                             | -1.27692 | 0.00356  |
| NM_183258 | RIKEN CDNA 2610001J05 GENE                                                                                             | -1.27316 | 0.007312 |
| AK032037  | RIKEN CDNA 2310014G06 GENE                                                                                             | -1.26032 | 0.006221 |
| NM_023343 | INTEGRIN-LINKED KINASE-ASSOCIATED SERINE/THREONINE<br>PHOSPHATASE 2C                                                   | -1.25756 | 0.001813 |

|           |                                                                                                                                      |          |          |
|-----------|--------------------------------------------------------------------------------------------------------------------------------------|----------|----------|
| NM_025418 | RIKEN CDNA 1110059P08 GENE                                                                                                           | -1.25298 | 0.006557 |
| NM_153058 | MICROTUBULE-ASSOCIATED PROTEIN, RP/EB FAMILY, MEMBER 2                                                                               | -1.24758 | 0.00567  |
| NM_019484 | RNA AND EXPORT FACTOR BINDING PROTEIN 2                                                                                              | -1.2356  | 0.000994 |
| BC052165  | ZINC FINGER PROTEIN 105                                                                                                              | -1.23434 | 0.00152  |
| NM_011696 | VOLTAGE-DEPENDENT ANION CHANNEL 3                                                                                                    | -1.22546 | 0.001757 |
| NM_025888 | RIKEN CDNA 2410004N11 GENE                                                                                                           | -1.2235  | 0.000953 |
| NM_026764 | GLUTATHIONE S-TRANSFERASE, MU 4                                                                                                      | -1.22162 | 0.001583 |
| AK088462  | HETEROGENEOUS NUCLEAR RIBONUCLEOPROTEIN K                                                                                            | -1.20958 | 0.000439 |
| AK014737  | RIKEN CDNA 3110001A18 GENE                                                                                                           | -1.20386 | 0.002676 |
| NM_009507 | VON HIPPEL-LINDAU SYNDROME HOMOLOG                                                                                                   | -1.2003  | 0.0008   |
| NM_009914 | CHEMOKINE (C-C MOTIF) RECEPTOR 3                                                                                                     | -1.18216 | 0.001239 |
| AK013254  | RIKEN CDNA 2410004N11 GENE                                                                                                           | -1.17994 | 0.001506 |
| NM_177235 | RIKEN CDNA B230209C24 GENE                                                                                                           | -1.17128 | 0.000818 |
| AK004324  | RIKEN CDNA 1200015A19 GENE                                                                                                           | -1.16426 | 0.001225 |
| AK085534  | RIKEN CDNA 2310009E04 GENE                                                                                                           | -1.16108 | 0.000478 |
| NM_133854 | SNAP-ASSOCIATED PROTEIN RECEPTOR (TNFRSF)-INTERACTING SERINE-THREONINE KINASE 1                                                      | -1.15098 | 0.003553 |
| NM_009068 | KINASE 1                                                                                                                             | -1.14776 | 0.002255 |
| NM_023173 | RIKEN CDNA 1190004O14 GENE                                                                                                           | -1.14228 | 0.000282 |
| AK012533  | RIKEN CDNA 2610039C10 GENE                                                                                                           | -1.14124 | 0.000987 |
| BC018353  | HETEROGENEOUS NUCLEAR RIBONUCLEOPROTEIN U                                                                                            | -1.13892 | 0.000812 |
| AK004324  | RIKEN CDNA 1200015A19 GENE                                                                                                           | -1.12772 | 0.002138 |
| NM_178613 | RIKEN CDNA 4933433P14 GENE                                                                                                           | -1.1251  | 0.001137 |
| AK036324  | TRANSFORMATION RELATED PROTEIN 53 BINDING PROTEIN 1                                                                                  | -1.12506 | 0.000104 |
| AK050250  | ADULT MALE LIVER TUMOR CDNA, RIKEN FULL-LENGTH ENRICHED LIBRARY, CLONE:C730031A08 PRODUCT:GAMMA TUBULIN RING COMPLEX PROTEIN HOMOLOG | -1.12032 | 0.000661 |
| BC061692  | ANKYRIN REPEAT DOMAIN 13A                                                                                                            | -1.11184 | 0.00265  |
| NM_007834 | DOWN SYNDROME CRITICAL REGION GENE 3                                                                                                 | -1.062   | 0.002464 |
| NM_175096 | DNA SEGMENT, CHR 5, ERATO DOI 593, EXPRESSED                                                                                         | -1.04986 | 0.000536 |
| AK007666  | STROMAL MEMBRANE-ASSOCIATED PROTEIN 1-LIKE                                                                                           | -1.04954 | 0.001946 |
| BC007173  | TRIPEPTIDYL PEPTIDASE II                                                                                                             | -1.0488  | 0.004192 |
| BC043449  | RIKEN CDNA 1600012H06 GENE                                                                                                           | -1.04256 | 0.000102 |
| BC024986  | SPASTIC PARAPLEGIA 7 HOMOLOG (HUMAN)                                                                                                 | -1.03722 | 0.001968 |
| NM_133716 | STROMAL MEMBRANE-ASSOCIATED PROTEIN 1-LIKE                                                                                           | -1.02646 | 0.001942 |
| AK087821  | RIKEN CDNA 2610528K11 GENE                                                                                                           | -1.02026 | 0.003458 |
| AK009216  | RIKEN CDNA 4933440H19 GENE                                                                                                           | -1.01564 | 0.000759 |
| AK003154  | ANKYRIN REPEAT DOMAIN 13A                                                                                                            | -1.00802 | 0.002971 |
| NM_133726 | SUPPRESSION OF TUMORIGENICITY 13                                                                                                     | -0.9637  | 0.002049 |
| AK012250  | NUCLEOSOME ASSEMBLY PROTEIN-1                                                                                                        | -0.95794 | 0.002543 |
| BC023062  | PROTEIN PHOSPHATASE 2, REGULATORY SUBUNIT B (B56), ALPHA ISOFORM                                                                     | -0.95516 | 0.004982 |

|           |                                                    |          |          |
|-----------|----------------------------------------------------|----------|----------|
| NM_172400 | DNAJ (HSP40) HOMOLOG, SUBFAMILY C, MEMBER 8        | -0.95068 | 0.002365 |
| AK051753  | HISTONE DEACETYLASE 2                              | -0.92224 | 0.002313 |
| NM_172758 | CDNA SEQUENCE BC031853                             | -0.90978 | 0.000146 |
| NM_026184 | ERO1-LIKE BETA (S. CEREVISIAE)                     | -0.9097  | 0.007155 |
|           | SMALL NUCLEAR RNA ACTIVATING COMPLEX, POLYPEPTIDE  |          |          |
| NM_178392 | 1                                                  | -0.90572 | 0.005169 |
| NM_027886 | SERINE/THREONINE KINASE 11 INTERACTING PROTEIN     | -0.87056 | 0.000575 |
| BC051487  | UBIQUITIN-CONJUGATING ENZYME E2Q (PUTATIVE)        | -0.84054 | 0.003975 |
|           | TANKYRASE, TRF1-INTERACTING ANKYRIN-RELATED ADP-   |          |          |
| BC057370  | RIBOSE POLYMERASE                                  | -0.83756 | 0.007117 |
| NM_145955 | RIKEN CDNA 1110007A13 GENE                         | -0.83494 | 0.001358 |
|           | PROTEIN PHOSPHATASE 2, REGULATORY SUBUNIT B (B56), |          |          |
| NM_144880 | ALPHA ISOFORM                                      | -0.82446 | 0.002278 |
| X76850    | MAP KINASE-ACTIVATED PROTEIN KINASE 2              | -0.79862 | 0.002171 |
|           | SERINE (OR CYSTEINE) PEPTIDASE INHIBITOR, CLADE B, |          |          |
| BC062169  | MEMBER 6C                                          | -0.76894 | 0.00177  |
| NM_007438 | ALDOLASE 1, A ISOFORM                              | -0.75164 | 0.003298 |
| BC002212  | RIKEN CDNA F830020C16 GENE                         | -0.74896 | 0.009179 |
| AK088308  | HETEROGENEOUS NUCLEAR RIBONUCLEOPROTEIN A1         | -0.7144  | 0.003939 |
| NM_134046 | RIKEN CDNA 2810429O05 GENE                         | -0.69302 | 0.001352 |
|           | PROTEIN PHOSPHATASE 2, REGULATORY SUBUNIT B (B56), |          |          |
| NM_144880 | ALPHA ISOFORM                                      | -0.65794 | 0.003523 |
|           | CLEAVAGE STIMULATION FACTOR, 3' PRE-RNA SUBUNIT 2, |          |          |
| AK082910  | TAU                                                | -0.6489  | 0.001782 |
| NM_080446 | HELICASE (DNA) B                                   | -0.48842 | 0.000587 |
|           | LECITHIN-RETINOL ACYLTRANSFERASE                   |          |          |
| AF255061  | (PHOSPHATIDYLCHOLINE-RETINOL-O-ACYLTRANSFERASE)    | 0.49708  | 0.000304 |
| NM_178071 | NON-METASTATIC CELLS 7, PROTEIN EXPRESSED IN       | 0.59372  | 2.75E-06 |
| NM_172863 | ZINC FINGER PROTEIN 697                            | 0.59836  | 0.002125 |
| NM_008966 | PROSTAGLANDIN F RECEPTOR                           | 0.59904  | 0.00369  |
| NM_145837 | INTERLEUKIN 17D                                    | 0.67888  | 0.003477 |
| AK003805  | RIKEN CDNA 1110019B22 GENE                         | 0.69132  | 0.001655 |
| AK053178  | SIMILAR TO AXONEMAL HEAVY CHAIN DYNEIN TYPE 3      | 0.73204  | 2.28E-05 |
| AK006923  | RIKEN CDNA 1700069L16 GENE                         | 0.7525   | 0.000577 |
| AK053150  | NUCLEAR FACTOR I/A                                 | 0.89038  | 0.003178 |
| BC044789  | VACUOLAR PROTEIN SORTING 37D (YEAST)               | 0.89836  | 0.000824 |
| AK008577  | RIKEN CDNA 2010317E24 GENE                         | 0.89866  | 0.000652 |
|           | POTASSIUM VOLTAGE GATED CHANNEL, SHAB-RELATED      |          |          |
| NM_008420 | SUBFAMILY, MEMBER 1                                | 0.9048   | 0.000927 |
| NM_134164 | SYNAPTOTAGMIN XII                                  | 0.91278  | 0.000596 |
| NM_178757 | INTERFERON REGULATORY FACTOR 2 BINDING PROTEIN 1   | 0.9657   | 0.000916 |
| NM_133194 | SEX COMB ON MIDLEG-LIKE 2 (DROSOPHILA)             | 0.9686   | 0.008217 |
|           | GLYCERALDEHYDE-3-PHOSPHATE DEHYDROGENASE,          |          |          |
| AK049951  | SPERMATOGENIC                                      | 1.00074  | 0.001737 |
| NM_145577 | CDNA SEQUENCE BC023179                             | 1.0215   | 0.001628 |

|             |                                                                                                       |         |          |
|-------------|-------------------------------------------------------------------------------------------------------|---------|----------|
| BC016891    | BILIARY GLYCOPROTEIN 1                                                                                | 1.05726 | 0.000207 |
| BC025887    | OPEN READING FRAME 34                                                                                 | 1.05922 | 0.000808 |
| BC002294    | TRANSMEMBRANE PROTEIN 16K                                                                             | 1.06524 | 0.000622 |
| BC058674    | PROLINE RICH 12                                                                                       | 1.07382 | 0.001348 |
| BC030392    | T-CELL RECEPTOR ALPHA CHAIN                                                                           | 1.08052 | 0.000505 |
| NM_173778   | RIKEN CDNA 4933412E14 GENE                                                                            | 1.08444 | 7.59E-05 |
| NM_016707   | B-CELL CLL/LYMPHOMA 11A (ZINC FINGER PROTEIN)<br>ATPASE, AMINOPHOSPHOLIPID TRANSPORTER-LIKE, CLASS I, | 1.10588 | 0.000823 |
| NM_015803   | TYPE 8A, MEMBER 2                                                                                     | 1.117   | 0.000372 |
| NM_027804   | UBIQUITIN SPECIFIC PEPTIDASE 19                                                                       | 1.11954 | 0.00345  |
| NM_175168   | PTK7 PROTEIN TYROSINE KINASE 7                                                                        | 1.15888 | 0.001518 |
| NM_028075   | TUMOR NECROSIS FACTOR RECEPTOR SUPERFAMILY,<br>MEMBER 13C                                             | 1.16512 | 0.003371 |
| BC046400    | PHOSPHOLIPASE A2, GROUP IVF                                                                           | 1.18858 | 0.000485 |
| AY149690    | GENERAL TRANSCRIPTION FACTOR II I REPEAT DOMAIN-<br>CONTAINING 1                                      | 1.1908  | 0.001329 |
| NM_023663   | RECEPTOR-INTERACTING SERINE-THREONINE KINASE 4                                                        | 1.19928 | 0.003017 |
| NM_172795   | RIKEN CDNA A830091I15 GENE                                                                            | 1.20694 | 0.00515  |
| AK044739    | RIKEN CDNA C030011O14 GENE                                                                            | 1.21428 | 0.003434 |
| BC042604    | SYNAPTIC NUCLEAR ENVELOPE 2                                                                           | 1.2149  | 0.000759 |
| M97957      | PYRUVATE CARBOXYLASE                                                                                  | 1.22024 | 0.000666 |
| NM_00100188 | 2<br>REGULATOR OF TELOMERE ELONGATION HELICASE 1                                                      | 1.22416 | 8.77E-05 |
| NM_133731   | PROTEASE, SERINE, 22                                                                                  | 1.22548 | 0.000274 |
| BC055912    | RIKEN CDNA 1700025G04 GENE                                                                            | 1.22746 | 0.001445 |
| NM_145635   | CDNA SEQUENCE BC054059                                                                                | 1.2282  | 0.000654 |
| NM_00100574 | 0<br>PHOSPHATASE AND ACTIN REGULATOR 1                                                                | 1.24306 | 0.000818 |
| NM_019956   | KERATIN COMPLEX 2, BASIC, GENE 6G                                                                     | 1.24656 | 3.14E-06 |
| AK010670    | HLA-B-ASSOCIATED TRANSCRIPT 3                                                                         | 1.24712 | 0.00289  |
| BC008228    | G PROTEIN-COUPLED RECEPTOR, FAMILY C, GROUP 5,<br>MEMBER C                                            | 1.25208 | 0.006317 |
| NM_008797   | PYRUVATE CARBOXYLASE                                                                                  | 1.26746 | 0.001114 |
| AK083524    | POL POLYPROTEIN                                                                                       | 1.2695  | 0.004942 |
| NM_145392   | BCL2-ASSOCIATED ATHANOGENE 2                                                                          | 1.26994 | 0.005599 |
| NM_213729   | EXPRESSED SEQUENCE AI842396                                                                           | 1.2768  | 0.001533 |
| BC059850    | FATTY ACID SYNTHASE                                                                                   | 1.29168 | 0.000499 |
| NM_134437   | INTERLEUKIN 17 RECEPTOR D                                                                             | 1.2978  | 0.003817 |
| NM_029794   | DNA SEGMENT, CHR 11, ERATO DOI 636, EXPRESSED                                                         | 1.30484 | 3.95E-06 |
| AK035271    | VILLIN 2                                                                                              | 1.3119  | 0.00071  |
| AJ272170    | SH3-BINDING DOMAIN GLUTAMIC ACID-RICH PROTEIN                                                         | 1.31388 | 0.000582 |
| NM_00100160 | 2<br>DISABLED HOMOLOG 2 (DROSOPHILA) INTERACTING<br>PROTEIN                                           | 1.31738 | 0.000259 |
| U96752      | HISTOCOMPATIBILITY 2, Q REGION LOCUS 1                                                                | 1.32642 | 0.001476 |

|             |                                                                                                                                                                        |         |          |
|-------------|------------------------------------------------------------------------------------------------------------------------------------------------------------------------|---------|----------|
| AK044030    | PROTEIN KINASE, AMP-ACTIVATED, ALPHA 2 CATALYTIC SUBUNIT                                                                                                               | 1.32668 | 0.000819 |
| BC046513    | FATTY ACID SYNTHASE                                                                                                                                                    | 1.33696 | 0.00275  |
| AK077665    | PYRUVATE CARBOXYLASE                                                                                                                                                   | 1.33814 | 0.000544 |
| NM_053254   | TRANSDUCIN-LIKE ENHANCER OF SPLIT 6, HOMOLOG OF DROSOPHILA E(SPL)                                                                                                      | 1.34354 | 0.003312 |
| NM_133743   | LY6/PLAUR DOMAIN CONTAINING 3                                                                                                                                          | 1.34618 | 0.002628 |
| AY178784    | DISABLED HOMOLOG 2 (DROSOPHILA) INTERACTING PROTEIN                                                                                                                    | 1.3617  | 0.000359 |
| AK006430    | CDC42 EFFECTOR PROTEIN (RHO GTPASE BINDING) 5                                                                                                                          | 1.36724 | 0.00166  |
| AF193435    | SRY-BOX CONTAINING GENE 14                                                                                                                                             | 1.3738  | 0.002003 |
| NM_139306   | RIKEN CDNA 2410116I05 GENE                                                                                                                                             | 1.37914 | 0.004545 |
| AK122487    | SORBIN AND SH3 DOMAIN CONTAINING 1                                                                                                                                     | 1.38392 | 0.001794 |
| AK021342    | RIKEN CDNA D730045B01 GENE                                                                                                                                             | 1.39778 | 0.001841 |
| AK010945    | UNC-5 HOMOLOG C (C. ELEGANS)-LIKE                                                                                                                                      | 1.4002  | 0.000729 |
| NM_178413   | CDNA SEQUENCE BC051244                                                                                                                                                 | 1.40926 | 0.000554 |
| AK075634    | RIKEN CDNA 1110025H02 GENE                                                                                                                                             | 1.41    | 0.005356 |
| AK006314    | SPERMATID PERINUCLEAR RNA BINDING PROTEIN                                                                                                                              | 1.41362 | 0.000333 |
| NM_019429   | PROTEASE, SERINE, 16 (THYMUS)                                                                                                                                          | 1.4179  | 0.000779 |
| U58494      | GAG                                                                                                                                                                    | 1.43068 | 0.004781 |
| NM_00100446 | TRANSFORMING, ACIDIC COILED-COIL CONTAINING PROTEIN 8                                                                                                                  | 1.43202 | 0.000487 |
| U58494      | GAG                                                                                                                                                                    | 1.43956 | 0.000304 |
| NM_021314   | TRANSFORMING, ACIDIC COILED-COIL CONTAINING PROTEIN 2                                                                                                                  | 1.44628 | 0.000777 |
| NM_177667   | TETRATRICOPEPTIDE REPEAT DOMAIN 22                                                                                                                                     | 1.44768 | 0.001873 |
| AK078209    | DIFFERENTIALLY EXPRESSED IN B16F10 1                                                                                                                                   | 1.4477  | 0.000585 |
| BC005674    | ZINC FINGER, CCHC DOMAIN CONTAINING 14                                                                                                                                 | 1.4496  | 0.002167 |
| NM_178848   | SIRTUIN 5 (SILENT MATING TYPE INFORMATION REGULATION 2 HOMOLOG) 5 (S. CEREVISIAE)                                                                                      | 1.45154 | 0.000772 |
| AK030513    | FAS APOPTOTIC INHIBITORY MOLECULE 2                                                                                                                                    | 1.45358 | 0.000948 |
| NM_054043   | MUSASHI HOMOLOG 2 (DROSOPHILA)                                                                                                                                         | 1.4592  | 0.001791 |
| AK049903    | TWEETY HOMOLOG 1 (DROSOPHILA)                                                                                                                                          | 1.4601  | 0.000723 |
| AK088963    | 2 DAYS NEONATE THYMUS THYMIC CELLS CDNA, RIKEN FULL-LENGTH ENRICHED LIBRARY, CLONE:E430033N13 PRODUCT:RETROVIRUS-RELATED POL POLYPROTEIN HOMOLOG, FULL INSERT SEQUENCE | 1.47326 | 0.004214 |
| BC048855    | RIKEN CDNA 2300006M17 GENE                                                                                                                                             | 1.47702 | 0.001755 |
| BC050137    | EXPRESSED SEQUENCE AA409659                                                                                                                                            | 1.48208 | 0.000729 |
| BC058398    | WINGLESS-RELATED MMTV INTEGRATION SITE 7B                                                                                                                              | 1.48524 | 0.00184  |
| BC028765    | RIKEN CDNA 0610010012 GENE                                                                                                                                             | 1.48528 | 0.000106 |
| AK122548    | DISABLED HOMOLOG 2 (DROSOPHILA) INTERACTING PROTEIN                                                                                                                    | 1.48864 | 0.000244 |
| NM_009528   | WINGLESS-RELATED MMTV INTEGRATION SITE 7B                                                                                                                              | 1.4918  | 0.001191 |
| NM_020006   | CDC42 EFFECTOR PROTEIN (RHO GTPASE BINDING) 4                                                                                                                          | 1.49794 | 0.001928 |

|           |                                                                   |         |          |
|-----------|-------------------------------------------------------------------|---------|----------|
| BC024883  | WD REPEAT DOMAIN, PHOSPHOINOSITIDE INTERACTING 1                  | 1.50714 | 0.000155 |
| NM_145919 | ABHYDROLASE DOMAIN CONTAINING 14A                                 | 1.51838 | 0.000636 |
| U58494    | GAG                                                               | 1.52854 | 0.000217 |
| NM_133816 | SH3-DOMAIN BINDING PROTEIN 4                                      | 1.53604 | 0.00242  |
| S74315    | ANTIGEN LEC-A                                                     | 1.54876 | 0.003068 |
| AK014390  | BETA-SITE APP CLEAVING ENZYME 1                                   | 1.55518 | 0.001701 |
| NM_011858 | ODD OZ/TEN-M HOMOLOG 4 (DROSOPHILA)                               | 1.55534 | 0.008638 |
| NM_145601 | CDNA SEQUENCE BC016201                                            | 1.56214 | 3.61E-05 |
| NM_026125 | C1Q DOMAIN CONTAINING 2                                           | 1.5646  | 7.15E-05 |
| NM_172383 | RIKEN CDNA 6330530A05 GENE                                        | 1.58148 | 0.006031 |
| NM_021534 | PEROXISOMAL MEMBRANE PROTEIN 4                                    | 1.59092 | 0.002103 |
| BC066175  | UBIQUITIN SPECIFIC PEPTIDASE 54                                   | 1.59274 | 0.000686 |
| S74315    | ANTIGEN LEC-A                                                     | 1.5941  | 0.003241 |
| NM_144534 | TRANSMEMBRANE PROTEIN 38A                                         | 1.59536 | 0.003156 |
| BC025943  | TANKYRASE 1 BINDING PROTEIN 1                                     | 1.59698 | 0.001044 |
| AK004054  | PHOSPHATE CYTIDYLYLTRANSFERASE 2, ETHANOLAMINE                    | 1.5984  | 0.003774 |
| AF019086  | KALLIKREIN 1-RELATED PEPTIDASE B24                                | 1.60568 | 0.001504 |
| NM_133995 | UREIDOPROPIONASE, BETA                                            | 1.61446 | 0.003331 |
| NM_133776 | G PROTEIN-COUPLED RECEPTOR 110                                    | 1.6202  | 0.003701 |
| AK050496  | DYNEIN, AXONEMAL, INTERMEDIATE CHAIN 1                            | 1.63282 | 0.001067 |
| AF521593  | SORBIN AND SH3 DOMAIN CONTAINING 1                                | 1.6367  | 0.001874 |
| AK129436  | TANKYRASE 1 BINDING PROTEIN 1                                     | 1.6447  | 0.000962 |
| AK050490  | OXYSTEROL BINDING PROTEIN-LIKE 10                                 | 1.64544 | 0.004003 |
| NM_011061 | PEPTIDYL ARGININE DEIMINASE, TYPE IV                              | 1.6456  | 0.001483 |
| NM_178149 | RIKEN CDNA 1500004A08 GENE                                        | 1.6457  | 7.9E-05  |
| NM_133667 | PYRUVATE DEHYDROGENASE KINASE, ISOENZYME 2                        | 1.6518  | 0.002368 |
| NM_175289 | RIKEN CDNA D930048N14 GENE                                        | 1.6523  | 0.00071  |
| AK019109  | NUDIX (NUCLEOSIDE DIPHOSPHATE LINKED MOIETY X)-TYPE MOTIF 17      | 1.66416 | 0.000439 |
| BC023356  | SRY-BOX CONTAINING GENE 10                                        | 1.6678  | 0.000893 |
| NM_018826 | IROQUOIS RELATED HOMEODOMAIN 5 (DROSOPHILA)                       | 1.67458 | 0.000745 |
| U37501    | LAMININ, ALPHA 5                                                  | 1.67644 | 0.000815 |
| AK042747  | EXPRESSED SEQUENCE C85492                                         | 1.67952 | 0.002895 |
| BC048832  | TRANSDUCIN-LIKE ENHANCER OF SPLIT 6, HOMOLOG OF DROSOPHILA E(SPL) | 1.68456 | 0.002819 |
| U58494    | GAG                                                               | 1.70372 | 0.003929 |
| AK004534  | RAS-LIKE, FAMILY 11, MEMBER B                                     | 1.70648 | 0.000194 |
| M10062    | INTRACISTERNAL A PARTICLES                                        | 1.70758 | 0.004568 |
| AK048708  | NEUREGULIN 1                                                      | 1.72086 | 0.003926 |
| AF017182  | SRY-BOX CONTAINING GENE 10                                        | 1.72086 | 0.000805 |
| AK052439  | NEOGENIN                                                          | 1.72152 | 0.008255 |
| NM_146013 | SEC14-LIKE 4 (S. CEREVISIAE)                                      | 1.73372 | 5.41E-05 |
| M10062    | INTRACISTERNAL A PARTICLES                                        | 1.74496 | 0.002295 |

|           |                                                                                                                                                                                 |         |          |
|-----------|---------------------------------------------------------------------------------------------------------------------------------------------------------------------------------|---------|----------|
| AK045783  | RAB3A INTERACTING PROTEIN                                                                                                                                                       | 1.75262 | 0.000494 |
| BC057211  | MITOGEN-ACTIVATED PROTEIN KINASE 11                                                                                                                                             | 1.76236 | 0.000795 |
| S74315    | ANTIGEN LEC-A                                                                                                                                                                   | 1.76886 | 0.003378 |
| AF461092  | CHONDROITIN SULFATE PROTEOGLYCAN 5                                                                                                                                              | 1.78558 | 0.004244 |
| S74315    | ANTIGEN LEC-A                                                                                                                                                                   | 1.78734 | 0.002167 |
| NM_172739 | GLUCOCORTICOID RECEPTOR DNA BINDING FACTOR 1                                                                                                                                    | 1.80576 | 0.00101  |
| NM_054071 | FIBROBLAST GROWTH FACTOR RECEPTOR-LIKE 1                                                                                                                                        | 1.80732 | 2.93E-05 |
| AK014261  | RIKEN CDNA 3110079015 GENE                                                                                                                                                      | 1.8136  | 0.001634 |
| BC021842  | SUSHI DOMAIN CONTAINING 4                                                                                                                                                       | 1.83408 | 0.001904 |
| NM_144549 | TRIBBLES HOMOLOG 1 (DROSOPHILA)                                                                                                                                                 | 1.83512 | 0.000517 |
| NM_130887 | PAPILIN, PROTEOGLYCAN-LIKE SULFATED GLYCOPROTEIN                                                                                                                                | 1.85044 | 3.33E-05 |
| AK006174  | RIKEN CDNA 1700020L24 GENE                                                                                                                                                      | 1.85506 | 0.00331  |
| NM_183037 | HYPOTHETICAL PROTEIN LOC54129                                                                                                                                                   | 1.86672 | 0.00095  |
| BC029233  | VALYL-TRNA SYNTHETASE 2-LIKE                                                                                                                                                    | 1.8751  | 0.001629 |
| NM_177679 | RIKEN CDNA 9130230L23 GENE                                                                                                                                                      | 1.88    | 0.001849 |
| NM_031874 | RAB3D, MEMBER RAS ONCOGENE FAMILY<br>DNA SEGMENT, CHR 10, BRIGHAM & WOMEN'S GENETICS                                                                                            | 1.8844  | 0.001181 |
| AK122475  | 1379 EXPRESSED                                                                                                                                                                  | 1.88814 | 0.001884 |
| NM_009567 | ZINC FINGER PROTEIN 93<br>NEURAL PROLIFERATION, DIFFERENTIATION AND CONTROL                                                                                                     | 1.9144  | 0.002393 |
| NM_008721 | GENE 1                                                                                                                                                                          | 1.91504 | 0.005242 |
| BC005747  | PAPILIN, PROTEOGLYCAN-LIKE SULFATED GLYCOPROTEIN                                                                                                                                | 1.92894 | 0.000327 |
| BC043478  | LAMININ, ALPHA 5                                                                                                                                                                | 1.92954 | 0.000925 |
| NM_181681 | CDNA SEQUENCE BC005764<br>ELOVL FAMILY MEMBER 7, ELONGATION OF LONG CHAIN                                                                                                       | 1.9333  | 0.004137 |
| NM_029001 | FATTY ACIDS (YEAST)                                                                                                                                                             | 1.96438 | 8.65E-06 |
| NM_010723 | LIM DOMAIN ONLY 4                                                                                                                                                               | 1.97128 | 0.003667 |
| AK033507  | GLUCOSAMINE                                                                                                                                                                     | 1.97132 | 0.003115 |
| NM_145973 | RIKEN CDNA A930015D22 GENE                                                                                                                                                      | 1.97484 | 0.000288 |
| NM_027984 | EPSIN 3                                                                                                                                                                         | 1.98072 | 0.000634 |
| NM_007929 | EPITHELIAL MEMBRANE PROTEIN 2                                                                                                                                                   | 1.98896 | 6.92E-05 |
| NM_133243 |                                                                                                                                                                                 | 1.99124 | 0.005683 |
| BC029028  | V-ERB-B2 ERYTHROBLASTIC LEUKEMIA VIRAL ONCOGENE<br>HOMOLOG 3 (AVIAN)                                                                                                            | 1.99686 | 0.000181 |
| AK017419  | DUAL SPECIFICITY PHOSPHATASE 8                                                                                                                                                  | 2.0108  | 0.002343 |
| NM_027419 | RIKEN CDNA 2810408A11 GENE                                                                                                                                                      | 2.01564 | 0.000475 |
| NM_023055 | SOLUTE CARRIER FAMILY 9 (SODIUM/HYDROGEN<br>EXCHANGER), ISOFORM 3 REGULATOR 2<br>ST6 (ALPHA-N-ACETYL-NEURAMINYL-2,3-BETA-GALACTOSYL-<br>1,3)-N-ACETYLGALACTOSAMINIDE ALPHA-2,6- | 2.01672 | 0.000246 |
| NM_009180 | SIALYLTRANSFERASE 2                                                                                                                                                             | 2.02154 | 3.63E-05 |
| BC026599  | RIKEN CDNA 4732435N03 GENE                                                                                                                                                      | 2.0221  | 0.002741 |
| BC016106  | ASPARAGINASE LIKE 1                                                                                                                                                             | 2.03332 | 0.002847 |
| NM_029341 | CALCYPHOSINE-LIKE                                                                                                                                                               | 2.0338  | 0.000516 |

|           |                                                                                                         |         |          |
|-----------|---------------------------------------------------------------------------------------------------------|---------|----------|
|           | SOLUTE CARRIER FAMILY 1 (NEURONAL/EPITHELIAL HIGH AFFINITY GLUTAMATE TRANSPORTER, SYSTEM XAG), MEMBER 1 |         |          |
| U75214    |                                                                                                         | 2.0349  | 0.004702 |
| BC065049  | HYPOTHETICAL PROTEIN LOC54129                                                                           | 2.04568 | 0.000792 |
| NM_153412 | RIKEN CDNA C820004H04 GENE                                                                              | 2.05574 | 0.003516 |
| AK076656  | RIKEN CDNA 4732415M23 GENE                                                                              | 2.05782 | 0.001499 |
| NM_026837 | TRANSMEMBRANE PROTEIN 53                                                                                | 2.06218 | 0.002346 |
| BC043727  | DENN/MADD DOMAIN CONTAINING 2D                                                                          | 2.06736 | 0.000152 |
| BC010843  | TRANSMEMBRANE PROTEASE, SERINE 13                                                                       | 2.06748 | 0.000365 |
| AK003974  | RIKEN CDNA 1110030G05 GENE                                                                              | 2.06876 | 0.000744 |
| NM_130878 | PROTOCADHERIN 21                                                                                        | 2.07482 | 0.003192 |
| BC024501  | LIGATIN                                                                                                 | 2.0772  | 0.000708 |
| BC006733  | CDNA SEQUENCE BC037006                                                                                  | 2.08028 | 0.007231 |
| AK122250  | RHO GUANINE NUCLEOTIDE EXCHANGE FACTOR (GEF) 17                                                         | 2.08246 | 0.000843 |
| NM_017403 | HYPOTHETICAL PROTEIN LOC54129                                                                           | 2.08718 | 0.000817 |
|           | MITOGEN ACTIVATED PROTEIN KINASE 8 INTERACTING PROTEIN 1                                                |         |          |
| NM_011162 |                                                                                                         | 2.089   | 0.00016  |
| NM_026728 | ENOYL COENZYME A HYDRATASE DOMAIN CONTAINING 2                                                          | 2.09754 | 1.26E-05 |
| NM_010423 | HAIRY/ENHANCER-OF-SPLIT RELATED WITH YRPW MOTIF 1                                                       | 2.10312 | 0.004148 |
| BC046827  | CHEMOKINE (C-X-C MOTIF) LIGAND 12                                                                       | 2.12226 | 0.001181 |
| BC046827  | CHEMOKINE (C-X-C MOTIF) LIGAND 12                                                                       | 2.12226 | 0.001181 |
| NM_009854 | CD7 ANTIGEN                                                                                             | 2.13208 | 0.002358 |
|           | RHO/RAC GUANINE NUCLEOTIDE EXCHANGE FACTOR (GEF) 18                                                     |         |          |
| BC009156  |                                                                                                         | 2.13838 | 0.000568 |
| BC032275  | RECEPTOR-LIKE TYROSINE KINASE                                                                           | 2.13948 | 0.000331 |
| BC008266  | DENN/MADD DOMAIN CONTAINING 2D                                                                          | 2.14518 | 0.000479 |
| BC049240  | LIGASE III, DNA, ATP-DEPENDENT                                                                          | 2.146   | 0.001278 |
| NM_011414 | SECRETORY LEUKOCYTE PEPTIDASE INHIBITOR                                                                 | 2.15266 | 0.001033 |
|           | 0 DAY NEONATE CEREBELLUM CDNA, RIKEN FULL-LENGTH ENRICHED LIBRARY, CLONE:C230080E09                     |         |          |
| AK082664  | PRODUCT:HYPOTHETICAL PROTEIN, FULL INSERT SEQUENCE                                                      | 2.15316 | 0.002313 |
| NM_008609 | MATRIX METALLOPEPTIDASE 15                                                                              | 2.1533  | 0.000431 |
| AK129371  | SHROOM                                                                                                  | 2.15506 | 0.001298 |
| NM_029413 | MICRORCHIDIA 4                                                                                          | 2.1603  | 0.002412 |
| BC003951  | INSULIN-LIKE GROWTH FACTOR BINDING PROTEIN 5                                                            | 2.1679  | 0.001984 |
| AK078970  | LAMININ, BETA 3                                                                                         | 2.16876 | 0.001252 |
| AK017530  | RIKEN CDNA 5730409E15 GENE                                                                              | 2.17046 | 0.005586 |
| NM_023564 | PHOSPHOLIPID SCRAMBLASE 3                                                                               | 2.17958 | 0.004595 |
| NM_009985 | CATHEPSIN W                                                                                             | 2.18526 | 0.001349 |
| NM_020578 | EH-DOMAIN CONTAINING 3                                                                                  | 2.19738 | 0.000931 |
| AK078901  | RIKEN CDNA 9130006H11 GENE                                                                              | 2.19768 | 0.000205 |
| AK031946  | RIKEN CDNA 6330505N24 GENE                                                                              | 2.20192 | 1.29E-05 |
| BC019731  | CDNA SEQUENCE BC019731                                                                                  | 2.20858 | 0.003272 |
| NM_172753 | RIKEN CDNA 4732435N03 GENE                                                                              | 2.20958 | 0.000255 |



|           |                                                                                             |         |          |
|-----------|---------------------------------------------------------------------------------------------|---------|----------|
| NM_013649 | RECEPTOR-LIKE TYROSINE KINASE<br>MICROTUBULE-ASSOCIATED PROTEIN 1 LIGHT CHAIN 3             | 2.21036 | 9.24E-05 |
| AK003122  | ALPHA                                                                                       | 2.2106  | 0.000478 |
| BC026392  | EH-DOMAIN CONTAINING 3                                                                      | 2.21582 | 0.000976 |
| NM_008860 | PROTEIN KINASE C, ZETA                                                                      | 2.21784 | 0.001466 |
| BC054465  | MYOSIN, HEAVY POLYPEPTIDE 14                                                                | 2.22624 | 0.004975 |
| AB093231  | TALIN 2                                                                                     | 2.23074 | 0.000594 |
| M12312    | ENVELOPE POLYPROTEIN                                                                        | 2.24556 | 0.002847 |
| AY363100  | MYOSIN, HEAVY POLYPEPTIDE 14                                                                | 2.24844 | 0.005942 |
| BC063753  | TROPONIN T2, CARDIAC                                                                        | 2.25028 | 0.000494 |
| NM_024479 | WILLIAMS BEUREN SYNDROME CHROMOSOME REGION 27<br>(HUMAN)                                    | 2.25588 | 0.001214 |
| AK129182  | HUNTINGTIN INTERACTING PROTEIN 1 RELATED                                                    | 2.26706 | 0.001583 |
| BC003909  | SHROOM                                                                                      | 2.27146 | 0.00081  |
| BC022680  | NEURONAL GUANINE NUCLEOTIDE EXCHANGE FACTOR                                                 | 2.2765  | 0.000871 |
| NM_080595 | EXPRESSED SEQUENCE AW122071                                                                 | 2.27974 | 0.003189 |
| AK005166  | INOSITOL HEXAPHOSPHATE KINASE 2                                                             | 2.28024 | 0.00319  |
| BC060270  | RIKEN CDNA 5133400C09 GENE                                                                  | 2.29756 | 0.005386 |
| NM_198001 | RIKEN CDNA 1110008P14 GENE                                                                  | 2.29814 | 0.002949 |
| BC058110  | RIKEN CDNA 2700063G02 GENE                                                                  | 2.29822 | 0.00208  |
| AK008111  | PROTOCADHERIN 1                                                                             | 2.30536 | 0.002749 |
| NM_026097 | RING FINGER AND FYVE LIKE DOMAIN CONTAINING PROTEIN                                         | 2.3186  | 0.003871 |
| BC041796  | MYOSIN, HEAVY POLYPEPTIDE 14                                                                | 2.32616 | 0.001727 |
| AK078167  | MICROTUBULE-ASSOCIATED PROTEIN TAU                                                          | 2.32728 | 0.001194 |
| NM_172520 | RHO GUANINE NUCLEOTIDE EXCHANGE FACTOR (GEF) 19                                             | 2.32774 | 0.00087  |
| NM_177784 | KELCH-LIKE 23 (DROSOPHILA)                                                                  | 2.32934 | 0.003509 |
| AK017597  | TALIN 2                                                                                     | 2.3304  | 0.000421 |
| BC046472  | TRANSIENT RECEPTOR POTENTIAL CATION CHANNEL,<br>SUBFAMILY M, MEMBER 4                       | 2.33352 | 0.000213 |
| NM_145890 | GRAINYHEAD-LIKE 1 (DROSOPHILA)                                                              | 2.34008 | 0.002962 |
| BC029027  | CALSYNTENIN 1                                                                               | 2.3455  | 0.000363 |
| BC026370  | TRANSMEMBRANE PROTEIN 63B                                                                   | 2.3567  | 0.000614 |
| AK044784  | TRANSCRIPTION FACTOR DP 2                                                                   | 2.35704 | 0.002621 |
| BC058632  | TRANSIENT RECEPTOR POTENTIAL CATION CHANNEL,<br>SUBFAMILY M, MEMBER 4                       | 2.36164 | 0.000292 |
| BC053843  | CALSYNTENIN 1                                                                               | 2.36272 | 0.000198 |
| NM_021542 | POTASSIUM CHANNEL, SUBFAMILY K, MEMBER 5<br>PLECKSTRIN HOMOLOGY DOMAIN CONTAINING, FAMILY F | 2.36426 | 0.001285 |
| AK007489  | (WITH FYVE DOMAIN) MEMBER 1                                                                 | 2.36968 | 0.00889  |
| NM_008150 | GLYPICAN 4                                                                                  | 2.38092 | 0.000284 |
| AK002723  | BCL2-ANTAGONIST/KILLER 1                                                                    | 2.39562 | 0.003826 |
| NM_133191 | EPS8-LIKE 2                                                                                 | 2.3967  | 0.000636 |
| NM_010593 | JUNCTION PLAKOGLOBIN                                                                        | 2.4056  | 0.000512 |
| AB110830  | PROTEIN KINASE C, ZETA                                                                      | 2.40682 | 0.000705 |

|           |                                                                                                                                      |         |          |
|-----------|--------------------------------------------------------------------------------------------------------------------------------------|---------|----------|
| NM_134253 | BCL2/ADENOVIRUS E1B 19KD INTERACTING PROTEIN LIKE                                                                                    | 2.40872 | 0.000722 |
| BC026771  | DISCOIDIN, CUB AND LCCL DOMAIN CONTAINING 1                                                                                          | 2.40928 | 0.002881 |
| BC062270  | MYOSIN VC                                                                                                                            | 2.4102  | 0.002186 |
| AK032223  | ADULT MALE OLFACTORY BRAIN CDNA, RIKEN FULL-LENGTH ENRICHED LIBRARY, CLONE:6430505H07 PRODUCT:EPH RECEPTOR A4, FULL INSERT SEQUENCE. | 2.41374 | 0.005669 |
| AK032154  | RIKEN CDNA 3110015B12 GENE                                                                                                           | 2.41722 | 0.003091 |
| BC046537  | TRANSIENT RECEPTOR POTENTIAL CATION CHANNEL, SUBFAMILY M, MEMBER 4                                                                   | 2.41736 | 0.000218 |
| NM_030704 | HEAT SHOCK PROTEIN 8                                                                                                                 | 2.4207  | 0.002858 |
| AK005104  | TRANSMEMBRANE PROTEIN 53                                                                                                             | 2.42102 | 0.001014 |
| BC010306  | RIKEN CDNA 3110043J09 GENE                                                                                                           | 2.42228 | 0.004343 |
| AK087163  | SARCOSINE DEHYDROGENASE                                                                                                              | 2.42316 | 0.000278 |
| NM_178667 | TRANSCRIPTION FACTOR DP 2                                                                                                            | 2.42324 | 0.001508 |
| AK012195  | EPHRIN A4                                                                                                                            | 2.42984 | 0.00267  |
| NM_175682 | RIKEN CDNA 9930021D14 GENE                                                                                                           | 2.449   | 0.000628 |
| BC059856  | TALIN 2                                                                                                                              | 2.45154 | 0.000963 |
| BC055303  | TYROSINE KINASE, NON-RECEPTOR, 1                                                                                                     | 2.4556  | 0.003205 |
| NM_019935 | OVO HOMOLOG-LIKE 1 (DROSOPHILA)                                                                                                      | 2.45774 | 0.000435 |
| NM_008484 | LAMININ, BETA 3                                                                                                                      | 2.45944 | 0.000417 |
| NM_172205 | SUPRABASIN                                                                                                                           | 2.46742 | 0.001863 |
| BC013080  | GRAINYHEAD-LIKE 1 (DROSOPHILA)                                                                                                       | 2.47112 | 0.001685 |
| NM_008113 | RHO GDP DISSOCIATION INHIBITOR (GDI) GAMMA                                                                                           | 2.47332 | 0.002718 |
| NM_031368 | BONE GAMMA-CARBOXYGLUTAMATE PROTEIN 2                                                                                                | 2.48278 | 0.000313 |
| AK029271  | RIKEN CDNA 1110036O03 GENE                                                                                                           | 2.49186 | 0.001444 |
| NM_013614 | ORNITHINE DECARBOXYLASE, STRUCTURAL 1                                                                                                | 2.49236 | 0.000685 |
| NM_008536 | TRANSMEMBRANE 4 SUPERFAMILY MEMBER 1                                                                                                 | 2.49398 | 0.001855 |
| AK029828  | TALIN 2                                                                                                                              | 2.50316 | 0.000396 |
| BC048704  | GLYCINE/ARGININE RICH PROTEIN 1                                                                                                      | 2.50838 | 0.000194 |
| NM_013709 | SH3 DOMAIN YSC-LIKE 1                                                                                                                | 2.51686 | 0.000766 |
| AK077839  | ACTININ ALPHA 4                                                                                                                      | 2.51842 | 5.27E-05 |
| AY046077  | NOTCH-REGULATED ANKYRIN REPEAT PROTEIN                                                                                               | 2.51954 | 0.002233 |
| AK076386  | RIKEN CDNA 9930021J17 GENE                                                                                                           | 2.5215  | 0.002899 |
| AK020578  | RNA BINDING MOTIF PROTEIN 35B                                                                                                        | 2.52304 | 0.000641 |
| NM_133784 | WW DOMAIN CONTAINING TRANSCRIPTION REGULATOR 1                                                                                       | 2.52596 | 8.03E-07 |
| NM_198190 | NEUROTROPHIN 5                                                                                                                       | 2.54118 | 0.005162 |
| NM_009197 | SOLUTE CARRIER FAMILY 16 (MONOCARBOXYLIC ACID TRANSPORTERS), MEMBER 2                                                                | 2.54286 | 8.69E-05 |
| AK077268  | INAD-LIKE (DROSOPHILA)                                                                                                               | 2.54286 | 0.001249 |
| NM_011792 | BETA-SITE APP CLEAVING ENZYME 1                                                                                                      | 2.54568 | 0.000991 |
| AK012385  | RIKEN CDNA 2700046G09 GENE                                                                                                           | 2.54624 | 0.000403 |
| NM_008056 | FRIZZLED HOMOLOG 6 (DROSOPHILA)                                                                                                      | 2.55856 | 0.00348  |
| AK008223  | RIKEN CDNA 4432405B04 GENE                                                                                                           | 2.55996 | 0.001028 |

|           |                                                                       |         |          |
|-----------|-----------------------------------------------------------------------|---------|----------|
| BC034069  | RIKEN CDNA A830073O21 GENE                                            | 2.57022 | 0.000144 |
| NM_009381 | THYROID HORMONE RESPONSIVE SPOT14 HOMOLOG<br>(RATTUS)                 | 2.5758  | 0.001427 |
| NM_009344 | PLECKSTRIN HOMOLOGY-LIKE DOMAIN, FAMILY A, MEMBER<br>1                | 2.5821  | 0.000466 |
| BC024687  | VANG, VAN GOGH-LIKE 1 (DROSOPHILA)                                    | 2.5875  | 0.002512 |
| AK013564  | RIKEN CDNA 1520402A15 GENE                                            | 2.5965  | 0.000272 |
| BC022615  | POTASSIUM CHANNEL TETRAMERISATION DOMAIN<br>CONTAINING 1              | 2.59688 | 0.000131 |
| NM_145403 | TRANSMEMBRANE PROTEASE, SERINE 4                                      | 2.59972 | 0.004283 |
| NM_009897 | CREATINE KINASE, MITOCHONDRIAL 1, UBIQUITOUS                          | 2.60696 | 0.004704 |
| AK050989  | EPHRIN A5                                                             | 2.60736 | 0.000708 |
| NM_008939 | PROTEASE, SERINE, 12 NEUROTRYPSIN (MOTOPSIN)                          | 2.61968 | 0.000761 |
| NM_010112 | EMBRYONAL FYN-ASSOCIATED SUBSTRATE                                    | 2.62556 | 0.000535 |
| AF026489  | SPECTRIN BETA 3                                                       | 2.63016 | 0.000496 |
| NM_175279 | RIKEN CDNA 4632411J06 GENE                                            | 2.63692 | 0.000336 |
| NM_011176 | SUPPRESSION OF TUMORIGENICITY 14 (COLON<br>CARCINOMA)                 | 2.64102 | 0.005298 |
| AK037015  | DNA SEGMENT, CHR 8, ERATO DOI 580, EXPRESSED                          | 2.64272 | 0.000193 |
| NM_007969 | EXTRACELLULAR PROTEINASE INHIBITOR                                    | 2.64288 | 0.000468 |
| NM_021895 | ACTININ ALPHA 4                                                       | 2.64478 | 0.000402 |
| AK045941  | L1 REPEAT, TF SUBFAMILY, MEMBER 29                                    | 2.65092 | 0.004464 |
| NM_053115 | ACYL-COENZYME A OXIDASE 2, BRANCHED CHAIN                             | 2.65328 | 0.000151 |
| NM_172682 | RIKEN CDNA 9930021J17 GENE                                            | 2.65394 | 0.00199  |
| NM_029823 | RIKEN CDNA 6530401D17 GENE                                            | 2.65988 | 0.000839 |
| AK032782  | RING FINGER PROTEIN 43                                                | 2.66608 | 0.000335 |
| NM_134050 | RAB15, MEMBER RAS ONCOGENE FAMILY                                     | 2.67164 | 0.000194 |
| AK035818  | RIKEN CDNA 2700063G02 GENE                                            | 2.7011  | 0.00087  |
| NM_178763 | RIKEN CDNA A030007D23 GENE                                            | 2.70136 | 0.000125 |
| BC044668  | RIKEN CDNA 2610305J24 GENE                                            | 2.70362 | 0.002261 |
| AK035114  | DUAL-SPECIFICITY TYROSINE-(Y)-PHOSPHORYLATION<br>REGULATED KINASE 3   | 2.717   | 0.003042 |
| NM_172613 | ATPASE TYPE 13A4                                                      | 2.72496 | 0.001893 |
| BC049993  | TRANSIENT RECEPTOR POTENTIAL CATION CHANNEL,<br>SUBFAMILY M, MEMBER 4 | 2.73106 | 0.001873 |
| AF068748  | SPHINGOSINE KINASE 1                                                  | 2.73756 | 0.000968 |
| AF051150  | BETA-SITE APP-CLEAVING ENZYME 2                                       | 2.7376  | 0.002287 |
| NM_010664 | KERATIN COMPLEX 1, ACIDIC, GENE 18                                    | 2.74148 | 0.003013 |
| NM_013670 | SMALL NUCLEAR RIBONUCLEOPROTEIN N                                     | 2.74374 | 0.000732 |
| AK053563  | DNA SEGMENT, CHR 8, ERATO DOI 580, EXPRESSED                          | 2.74572 | 0.000945 |
| NM_177638 | CRUMBS HOMOLOG 3 (DROSOPHILA)                                         | 2.74948 | 0.002525 |
| NM_009525 | WINGLESS-RELATED MMTV INTEGRATION SITE 5B                             | 2.76258 | 0.000773 |
| AK088204  | SPECIAL AT-RICH SEQUENCE BINDING PROTEIN 1                            | 2.76616 | 0.000146 |
| AK019183  | PRP40 PRE-MRNA PROCESSING FACTOR 40 HOMOLOG A                         | 2.76934 | 0.000308 |

|           | (YEAST)                                                                                       |         |          |
|-----------|-----------------------------------------------------------------------------------------------|---------|----------|
| NM_013900 | ANTIGEN P97 (MELANOMA ASSOCIATED) IDENTIFIED BY MONOCLONAL ANTIBODIES 133.2 AND 96.5          | 2.77148 | 0.004743 |
| AK032057  | ECTONUCLEOSIDE TRIPHOSPHATE DIPHOSPHOHYDROLASE 3                                              | 2.77312 | 0.000887 |
| NM_021344 | TESCALCIN                                                                                     | 2.77948 | 0.002868 |
| NM_178928 | EXPRESSED SEQUENCE AI173486                                                                   | 2.77974 | 0.002186 |
| NM_145394 | SOLUTE CARRIER FAMILY 44, MEMBER 3                                                            | 2.78472 | 0.001777 |
| BC051406  | WINGLESS-RELATED MMTV INTEGRATION SITE 5B                                                     | 2.78496 | 0.001378 |
| NM_182930 | HYPOTHETICAL PROTEIN BC031133                                                                 | 2.78562 | 0.00027  |
| NM_007741 | PROCOLLAGEN, TYPE IX, ALPHA 2                                                                 | 2.78654 | 0.00176  |
| AK009513  | RAS HOMOLOG GENE FAMILY, MEMBER U                                                             | 2.79122 | 0.002764 |
| D87966    | TEA DOMAIN FAMILY MEMBER 4                                                                    | 2.80758 | 3.29E-05 |
| NM_010271 | GLYCEROL-3-PHOSPHATE DEHYDROGENASE 1 (SOLUBLE)                                                | 2.81284 | 0.000579 |
| AK005885  | TRANSMEMBRANE PROTEIN 53                                                                      | 2.81396 | 0.003421 |
| NM_144919 | HISTONE DEACETYLASE 11                                                                        | 2.81434 | 0.001058 |
| NM_134249 | T-CELL IMMUNOGLOBULIN AND MUCIN DOMAIN CONTAINING 2                                           | 2.81972 | 0.001103 |
| AK028848  | RIKEN CDNA 2700063G02 GENE                                                                    | 2.82618 | 0.000524 |
| AK053704  | TRANSCRIPTION FACTOR AP-2, ALPHA                                                              | 2.8319  | 0.003518 |
| NM_023805 | SOLUTE CARRIER FAMILY 38, MEMBER 3                                                            | 2.83448 | 0.000513 |
| AK045941  | L1 REPEAT, TF SUBFAMILY, MEMBER 29                                                            | 2.83462 | 0.005528 |
| NM_025367 | SPHINGOSINE KINASE 1                                                                          | 2.84494 | 0.001306 |
| AK046433  | RIKEN CDNA 4632411J06 GENE                                                                    | 2.84612 | 0.00023  |
| NM_133955 | RAS HOMOLOG GENE FAMILY, MEMBER U                                                             | 2.84648 | 0.002215 |
| NM_013738 | PLECKSTRIN 2                                                                                  | 2.8473  | 0.001703 |
| BC043322  | PLEXIN B1                                                                                     | 2.85284 | 0.000227 |
| NM_008036 | FBJ OSTEOSARCOMA ONCOGENE B                                                                   | 2.85308 | 0.002116 |
| BC029089  | RIKEN CDNA 2010300C02 GENE                                                                    | 2.85624 | 0.000433 |
| BC010337  | KERATIN COMPLEX 2, BASIC, GENE 7                                                              | 2.85726 | 0.000278 |
| NM_153784 | CDNA SEQUENCE BC038613                                                                        | 2.85844 | 0.003051 |
| AK050531  | RIKEN CDNA C630004H02 GENE                                                                    | 2.86602 | 0.000239 |
| AK012553  | METALLOPHOSPHOESTERASE DOMAIN CONTAINING 2                                                    | 2.86638 | 0.002034 |
| S42570    | DYSTROPHIN                                                                                    | 2.86676 | 0.000901 |
| NM_172528 | LEUCINE RICH REPEAT CONTAINING 1                                                              | 2.8704  | 0.003551 |
| NM_207654 | EPHRIN A5                                                                                     | 2.87358 | 0.000879 |
| AK045941  | L1 REPEAT, TF SUBFAMILY, MEMBER 29                                                            | 2.875   | 0.003962 |
| AK045941  | L1 REPEAT, TF SUBFAMILY, MEMBER 29                                                            | 2.882   | 0.003713 |
| AK014292  | PROCOLLAGEN, TYPE XVIII, ALPHA 1                                                              | 2.90196 | 0.001021 |
| BC005780  | A DISINTEGRIN-LIKE AND METALLOPEPTIDASE (REPROLYSIN TYPE) WITH THROMBOSPONDIN TYPE 1 MOTIF, 8 | 2.9057  | 0.003791 |
| NM_010125 | E74-LIKE FACTOR 5                                                                             | 2.91018 | 0.001399 |
| AF047377  | HEAT SHOCK PROTEIN 1                                                                          | 2.9127  | 0.000968 |
| AK045941  | L1 REPEAT, TF SUBFAMILY, MEMBER 29                                                            | 2.91424 | 0.005291 |

|           |                                                                                         |         |          |
|-----------|-----------------------------------------------------------------------------------------|---------|----------|
| BC042459  | CINGULIN                                                                                | 2.91598 | 0.000636 |
| NM_145826 | INTERLEUKIN 17 RECEPTOR E                                                               | 2.9181  | 0.001423 |
| NM_175454 | RIKEN CDNA C630004H02 GENE                                                              | 2.91818 | 0.000195 |
| NM_144795 | PYRROLINE-5-CARBOXYLATE REDUCTASE 1                                                     | 2.9217  | 0.000191 |
| NM_016887 | CLAUDIN 7                                                                               | 2.92242 | 0.001324 |
| NM_026708 | TLC DOMAIN CONTAINING 1                                                                 | 2.92742 | 0.000579 |
| AK045941  | L1 REPEAT, TF SUBFAMILY, MEMBER 29                                                      | 2.92858 | 0.003976 |
| BC003962  | NCK-ASSOCIATED PROTEIN 1                                                                | 2.92866 | 0.001109 |
| AK045941  | L1 REPEAT, TF SUBFAMILY, MEMBER 29                                                      | 2.9349  | 0.004848 |
| AK015784  | STEAROYL-COENZYME A DESATURASE 3                                                        | 2.93854 | 0.00138  |
| NM_010800 | BASIC HELIX-LOOP-HELIX DOMAIN CONTAINING, CLASS B, 8                                    | 2.94426 | 0.002954 |
| NM_181820 | TRANSMEMBRANE CHANNEL-LIKE GENE FAMILY 4                                                | 2.94726 | 0.002255 |
| BC022613  | LEUCINE RICH REPEAT CONTAINING 1                                                        | 2.94962 | 0.004509 |
| AK045941  | L1 REPEAT, TF SUBFAMILY, MEMBER 29                                                      | 2.95268 | 0.006256 |
| AK045941  | L1 REPEAT, TF SUBFAMILY, MEMBER 29                                                      | 2.9558  | 0.008682 |
| AK045941  | L1 REPEAT, TF SUBFAMILY, MEMBER 29                                                      | 2.96564 | 0.006762 |
| AK045941  | L1 REPEAT, TF SUBFAMILY, MEMBER 29                                                      | 2.96916 | 0.003606 |
| BC051512  | RIKEN CDNA 2310026E23 GENE                                                              | 2.98264 | 0.000485 |
| NM_025519 | RIKEN CDNA 2310010I16 GENE                                                              | 2.98924 | 0.000421 |
| BC004016  | URIDINE-CYTIDINE KINASE 2                                                               | 3.0028  | 0.000771 |
| BC064474  | CINGULIN                                                                                | 3.00294 | 0.000628 |
| AK045941  | L1 REPEAT, TF SUBFAMILY, MEMBER 29                                                      | 3.00534 | 0.007061 |
| AK045941  | L1 REPEAT, TF SUBFAMILY, MEMBER 29                                                      | 3.01068 | 0.005922 |
| NM_008034 | FOLATE RECEPTOR 1 (ADULT)                                                               | 3.01104 | 0.000171 |
| NM_153577 | EXPRESSED SEQUENCE AI428936                                                             | 3.01232 | 0.000509 |
| BC030329  | FERRIMHOGEF (ARHGEF) AND PLECKSTRIN DOMAIN PROTEIN 1 (CHONDROCYTE-DERIVED)              | 3.02084 | 0.001234 |
| NM_025865 | RIKEN CDNA 2310030G06 GENE                                                              | 3.0221  | 0.002595 |
| AK045941  | L1 REPEAT, TF SUBFAMILY, MEMBER 29                                                      | 3.02338 | 0.006001 |
| NM_027292 | BENZODIAZAPINE RECEPTOR, PERIPHERAL-LIKE 1                                              | 3.0237  | 0.000379 |
| AK045941  | L1 REPEAT, TF SUBFAMILY, MEMBER 29                                                      | 3.02826 | 0.007584 |
| BC062194  | INAD-LIKE (DROSOPHILA)                                                                  | 3.02934 | 0.000863 |
| NM_008125 | GAP JUNCTION MEMBRANE CHANNEL PROTEIN BETA 2                                            | 3.0315  | 0.001341 |
| BC027812  | KERATINOCYTE ASSOCIATED PROTEIN 3                                                       | 3.03554 | 0.002345 |
| BC056636  | ATPASE, H+ TRANSPORTING, LYSOSOMAL V1 SUBUNIT C2                                        | 3.03746 | 0.002787 |
| NM_017405 | LIPOLYSIS STIMULATED LIPOPROTEIN RECEPTOR SOLUTE CARRIER FAMILY 5 (IODIDE TRANSPORTER), | 3.04094 | 0.003101 |
| AK039927  | MEMBER 8                                                                                | 3.0425  | 0.000966 |
| NM_022032 | PERP, TP53 APOPTOSIS EFFECTOR                                                           | 3.04352 | 0.001569 |
| NM_026323 | WAP FOUR-DISULFIDE CORE DOMAIN 2                                                        | 3.04488 | 0.00459  |
| AK045941  | L1 REPEAT, TF SUBFAMILY, MEMBER 29                                                      | 3.04544 | 0.006174 |
| NM_133664 | LADININ                                                                                 | 3.04646 | 0.000151 |
| AK045941  | L1 REPEAT, TF SUBFAMILY, MEMBER 29                                                      | 3.0575  | 0.007811 |

|           |                                                                                                                |         |          |
|-----------|----------------------------------------------------------------------------------------------------------------|---------|----------|
| BC043327  | FERMRHOGEF (ARHGEF) AND PLECKSTRIN DOMAIN PROTEIN 1 (CHONDROCYTE-DERIVED)                                      | 3.0841  | 0.001128 |
| NM_145562 | RIKEN CDNA 9130213B05 GENE                                                                                     | 3.08442 | 0.000278 |
| BC044668  | RIKEN CDNA 2610305J24 GENE                                                                                     | 3.08604 | 0.001718 |
| NM_016966 | 3-PHOSPHOGLYCERATE DEHYDROGENASE                                                                               | 3.09796 | 0.00091  |
| BC018257  | HEAT SHOCK PROTEIN 1                                                                                           | 3.1026  | 0.000503 |
| NM_172775 | PLEXIN B1                                                                                                      | 3.11116 | 0.000299 |
| NM_009334 | TRANSCRIPTION FACTOR AP-2 BETA                                                                                 | 3.11286 | 0.000278 |
| AK078614  | PROTEIN TYROSINE PHOSPHATASE, RECEPTOR TYPE, K                                                                 | 3.11624 | 0.001578 |
| BC009815  | MELANOMA INHIBITORY ACTIVITY 1                                                                                 | 3.11638 | 0.000527 |
| AK010355  | ENDOTHELIAL PRECURSOR PROTEIN B9                                                                               | 3.1177  | 0.001306 |
| NM_027402 | FIBRONECTIN TYPE III DOMAIN CONTAINING 5                                                                       | 3.13372 | 0.000238 |
| NM_009902 | CLAUDIN 3                                                                                                      | 3.138   | 0.003528 |
| AK034903  | FERMRHOGEF (ARHGEF) AND PLECKSTRIN DOMAIN PROTEIN 1 (CHONDROCYTE-DERIVED)                                      | 3.15282 | 0.00108  |
| NM_029796 | LEUCINE-RICH ALPHA-2-GLYCOPROTEIN 1                                                                            | 3.1535  | 0.002316 |
| NM_053015 | MELANOPHILIN                                                                                                   | 3.1567  | 0.000909 |
| NM_015789 | DICKKOPF-LIKE 1                                                                                                | 3.15764 | 0.001475 |
| BC027077  | FERMRHOGEF (ARHGEF) AND PLECKSTRIN DOMAIN PROTEIN 1 (CHONDROCYTE-DERIVED)                                      | 3.16718 | 0.001064 |
| NM_013593 | MYOGLOBIN                                                                                                      | 3.16896 | 0.002127 |
| AF033274  | A KINASE (PRKA) ANCHOR PROTEIN 2                                                                               | 3.16914 | 9.64E-05 |
| BC037633  | RIKEN CDNA 2310026E23 GENE                                                                                     | 3.16964 | 0.00209  |
| NM_007759 | CELLULAR RETINOIC ACID BINDING PROTEIN II                                                                      | 3.17328 | 0.001041 |
| BC054113  | RIBOSOMAL PROTEIN S6 KINASE POLYPEPTIDE 6                                                                      | 3.18842 | 0.002764 |
| AK009888  | D164 SIALOMUCIN-LIKE 2                                                                                         | 3.1931  | 0.00011  |
| NM_009335 | TRANSCRIPTION FACTOR AP-2, GAMMA                                                                               | 3.19336 | 0.00024  |
| NM_021300 | REPRODUCTIVE HOMEBOX 4B                                                                                        | 3.19738 | 0.000867 |
| BC004009  | FERMRHOGEF (ARHGEF) AND PLECKSTRIN DOMAIN PROTEIN 1 (CHONDROCYTE-DERIVED)                                      | 3.20036 | 0.001639 |
| NM_007563 | 2,3-BISPHOSPHOGLYCERATE MUTASE                                                                                 | 3.20262 | 0.000733 |
| NM_010152 | V-ERB-B2 ERYTHROBLASTIC LEUKEMIA VIRAL ONCOGENE HOMOLOG 2, NEURO/GLIOBLASTOMA DERIVED ONCOGENE HOMOLOG (AVIAN) | 3.21606 | 0.000514 |
| AK012136  | CBP/P300-INTERACTING TRANSACTIVATOR, WITH GLU/ASP-RICH CARBOXY-TERMINAL DOMAIN, 4                              | 3.2177  | 0.001056 |
| AK048658  | PROTEIN TYROSINE PHOSPHATASE, RECEPTOR TYPE, K                                                                 | 3.21976 | 0.000643 |
| AK004470  | RIKEN CDNA 1190003J15 GENE                                                                                     | 3.22718 | 2.96E-05 |
| NM_026416 | S100 CALCIUM BINDING PROTEIN A16                                                                               | 3.23322 | 6E-05    |
| AK010151  | FRUCTOSAMINE 3 KINASE                                                                                          | 3.23668 | 0.001827 |
| AK008189  | GLUTATHIONE S-TRANSFERASE, ALPHA 4                                                                             | 3.23678 | 0.000557 |
| M19436    | MYOSIN, LIGHT POLYPEPTIDE 4                                                                                    | 3.2396  | 0.000378 |
| BC022608  | SYNAPTOTAGMIN-LIKE 3                                                                                           | 3.2424  | 0.000342 |
| NM_024223 | CYSTEINE RICH PROTEIN 2                                                                                        | 3.25174 | 0.002079 |

|           |                                                                                          |         |          |
|-----------|------------------------------------------------------------------------------------------|---------|----------|
| NM_009697 | NUCLEAR RECEPTOR SUBFAMILY 2, GROUP F, MEMBER 2                                          | 3.25636 | 0.001578 |
| BC031863  | LEUCINE RICH REPEAT CONTAINING 8 FAMILY, MEMBER E                                        | 3.26346 | 6.69E-05 |
| NM_133351 | PROTEASE, SERINE, 8 (PROSTASIN)                                                          | 3.26392 | 0.001374 |
| NM_025778 | RIKEN CDNA 4933405K19 GENE                                                               | 3.26504 | 2.72E-05 |
| NM_178049 | EXPRESSED SEQUENCE AI839049                                                              | 3.28602 | 0.000126 |
| NM_011935 | ESTROGEN-RELATED RECEPTOR GAMMA                                                          | 3.29866 | 0.000959 |
| U16669    | SIMILAR TO HYPOTHETICAL PROTEIN ORF-1137                                                 | 3.29954 | 0.004148 |
| NM_146188 | POTASSIUM CHANNEL TETRAMERISATION DOMAIN<br>CONTAINING 15                                | 3.32314 | 0.005422 |
| NM_030209 | CYSTEINE-RICH SECRETORY PROTEIN LCCL DOMAIN<br>CONTAINING 2                              | 3.33002 | 0.000274 |
| BC058773  | START DOMAIN CONTAINING 10                                                               | 3.3356  | 0.000612 |
| BC008156  | UBIQUITIN SPECIFIC PEPTIDASE 43                                                          | 3.33896 | 0.002517 |
| U16669    | SIMILAR TO HYPOTHETICAL PROTEIN ORF-1137                                                 | 3.3397  | 0.003892 |
| BC044668  | RIKEN CDNA 2610305J24 GENE                                                               | 3.34728 | 0.004912 |
| AK004652  | EXCISION REPAIR CROSS-COMPLEMENTING RODENT REPAIR<br>DEFICIENCY, COMPLEMENTATION GROUP 2 | 3.34776 | 3.78E-05 |
| NM_008597 | MATRIX GLA PROTEIN                                                                       | 3.3598  | 0.003896 |
| BC044668  | RIKEN CDNA 2610305J24 GENE                                                               | 3.36002 | 0.005011 |
| NM_011254 | RETINOL BINDING PROTEIN 1, CELLULAR                                                      | 3.36002 | 0.000383 |
| NM_007949 | EXCISION REPAIR CROSS-COMPLEMENTING RODENT REPAIR<br>DEFICIENCY, COMPLEMENTATION GROUP 2 | 3.39034 | 5.47E-05 |
| BC060266  | DIMETHYLARGININE DIMETHYLAMINOHYDROLASE 1                                                | 3.40006 | 0.00106  |
| BC049954  | EXPRESSED SEQUENCE AI839049                                                              | 3.40826 | 0.001071 |
| AF331640  | LECTIN, GALACTOSE BINDING, SOLUBLE 7                                                     | 3.40916 | 0.000597 |
| NM_144953 | RIKEN CDNA 1700019D03 GENE                                                               | 3.41752 | 0.002878 |
| AK003632  | HOMER HOMOLOG 2 (DROSOPHILA)                                                             | 3.41866 | 2.42E-05 |
| BC044668  | RIKEN CDNA 2610305J24 GENE                                                               | 3.43698 | 0.003162 |
| NM_019990 | START DOMAIN CONTAINING 10                                                               | 3.43794 | 0.000215 |
| NM_026163 | PLAKOPHILIN 2                                                                            | 3.45644 | 0.001429 |
| AK078864  | TRANSMEMBRANE PROTEIN 40                                                                 | 3.45808 | 0.000842 |
| BC057166  | PROTEIN TYROSINE PHOSPHATASE, RECEPTOR TYPE, F                                           | 3.46396 | 0.000565 |
| NM_028078 | JUNCTION ADHESION MOLECULE 4                                                             | 3.46396 | 5.71E-05 |
| NM_145395 | CDNA SEQUENCE BC019755                                                                   | 3.46974 | 0.000281 |
| AF363723  | FRIZZLED HOMOLOG 2 (DROSOPHILA)                                                          | 3.48606 | 0.002789 |
| AK009235  | PROTEIN PHOSPHATASE 1J                                                                   | 3.50378 | 5.29E-05 |
| NM_009413 | TUMOR PROTEIN D52-LIKE 1                                                                 | 3.51358 | 8.37E-05 |
| NM_010158 | KH DOMAIN CONTAINING, RNA BINDING, SIGNAL<br>TRANSDUCTION ASSOCIATED 3                   | 3.51822 | 0.000129 |
| NM_153392 | RIKEN CDNA 4922503N01 GENE                                                               | 3.52352 | 5.02E-05 |
| AF237721  | PROCOLLAGEN, TYPE IX, ALPHA 3                                                            | 3.53072 | 0.001217 |
| AF143541  | DECAY ACCELERATING FACTOR 1                                                              | 3.53788 | 0.000295 |
| BC018335  | SOLUTE CARRIER FAMILY 15 (H+/PEPTIDE TRANSPORTER),<br>MEMBER 2                           | 3.54524 | 0.001694 |

|           |                                                                                              |         |          |
|-----------|----------------------------------------------------------------------------------------------|---------|----------|
| NM_146230 | ACETYL-COENZYME A ACYLTRANSFERASE 1A                                                         | 3.55342 | 0.001089 |
| NM_010516 | CYSTEINE RICH PROTEIN 61                                                                     | 3.55754 | 0.001292 |
| M25944    | CARBONIC ANHYDRASE 2                                                                         | 3.56518 | 0.001041 |
| AK053576  | DNA SEGMENT, CHR 8, ERATO DOI 580, EXPRESSED                                                 | 3.57444 | 0.000765 |
| NM_007675 | CEA-RELATED CELL ADHESION MOLECULE 10                                                        | 3.58462 | 0.000623 |
| BC024606  | SERUM AMYLOID A 2                                                                            | 3.60458 | 0.000849 |
| NM_177130 | GLYCOSYLTRANSFERASE 28 DOMAIN CONTAINING 2                                                   | 3.60756 | 7.52E-05 |
| BC057925  | RIKEN CDNA 5430432L21 GENE                                                                   | 3.61048 | 0.001252 |
| NM_172563 | HEPATIC LEUKEMIA FACTOR                                                                      | 3.61484 | 0.000501 |
| BC019563  | TRANSMEMBRANE PROTEIN 54                                                                     | 3.6182  | 0.000578 |
| AK003258  | PROCOLLAGEN, TYPE IX, ALPHA 3                                                                | 3.62276 | 0.000457 |
| BC025454  | ENOYL COENZYME A HYDRATASE DOMAIN CONTAINING 2                                               | 3.6239  | 0.00067  |
| NM_009936 | PROCOLLAGEN, TYPE IX, ALPHA 3                                                                | 3.62404 | 0.001838 |
| BC002195  | RIKEN CDNA C430003P19 GENE                                                                   | 3.6384  | 6.69E-05 |
| AK009434  | SOLUTE CARRIER ORGANIC ANION TRANSPORTER FAMILY, MEMBER 2A1                                  | 3.64328 | 0.001496 |
| NM_009931 | PROCOLLAGEN, TYPE IV, ALPHA 1                                                                | 3.64434 | 0.000223 |
| NM_011314 | SERUM AMYLOID A 2                                                                            | 3.64766 | 0.000924 |
| BC024529  | CUE DOMAIN CONTAINING 1                                                                      | 3.64996 | 1.49E-05 |
| AK020842  | NETRIN G1                                                                                    | 3.65774 | 0.000954 |
| NM_008738 | NEURTURIN                                                                                    | 3.6776  | 0.000161 |
| NM_201236 | RIKEN CDNA 5430432L21 GENE                                                                   | 3.73218 | 0.000697 |
| BC027668  | GENE MODEL 566, (NCBI)                                                                       | 3.73438 | 3.46E-05 |
| NM_008059 | G0/G1 SWITCH GENE 2                                                                          | 3.74494 | 2.59E-05 |
| BC056176  | LAMININ, ALPHA 4                                                                             | 3.74706 | 0.001018 |
| NM_212457 | BRAIN EXPRESSED GENE 4                                                                       | 3.76912 | 0.000267 |
| M21800    | RIKEN CDNA 9130020O15 GENE                                                                   | 3.78748 | 0.003176 |
| BC018338  | MATRIX GLA PROTEIN                                                                           | 3.80754 | 0.002582 |
| U43525    | PROTEINASE 3                                                                                 | 3.81598 | 0.000788 |
| BC048564  | RIKEN CDNA 4930415O20 GENE                                                                   | 3.82288 | 4.65E-05 |
| AK077300  | THYROID HORMONE RESPONSIVE SPOT14 HOMOLOG (RATTUS)                                           | 3.82874 | 0.000325 |
| NM_011178 | PROTEINASE 3                                                                                 | 3.85708 | 0.000532 |
| NM_172506 | BIREGIONAL CELL ADHESION MOLECULE-RELATED/DOWN-REGULATED BY ONCOGENES (CDON) BINDING PROTEIN | 3.86494 | 0.000497 |
| M21800    | RIKEN CDNA 9130020O15 GENE                                                                   | 3.90512 | 0.003295 |
| BC011055  | TRANSFORMING GROWTH FACTOR, BETA 2                                                           | 3.90578 | 1.12E-05 |
| BC026443  | BIREGIONAL CELL ADHESION MOLECULE-RELATED/DOWN-REGULATED BY ONCOGENES (CDON) BINDING PROTEIN | 3.91216 | 0.000548 |
| AK053689  | NETRIN G1                                                                                    | 3.9222  | 0.000701 |
| BC021849  | EXPRESSED SEQUENCE AW122071                                                                  | 3.93438 | 0.000294 |
| BC055439  | MYOSIN, LIGHT POLYPEPTIDE 9, REGULATORY                                                      | 3.99758 | 0.000554 |
| BC055439  | MYOSIN, LIGHT POLYPEPTIDE 9, REGULATORY                                                      | 4.02434 | 0.000128 |
| BC054421  | DYSFERLIN                                                                                    | 4.05954 | 0.000197 |



|           |                                           |         |          |
|-----------|-------------------------------------------|---------|----------|
| AK007353  | ENVOPLAKIN                                | 4.08962 | 1.68E-05 |
| V00856    | WHEY ACIDIC PROTEIN                       | 4.23336 | 0.001358 |
| BC005582  | PEPTIDOGLYCAN RECOGNITION PROTEIN 1       | 4.31988 | 0.000623 |
| NM_175000 | HEMOGLOBIN, THETA 1                       | 4.52328 | 0.001103 |
| AK011075  | HEMOGLOBIN BETA CHAIN COMPLEX             | 4.5902  | 0.001378 |
| AK008047  | WNK LYSINE DEFICIENT PROTEIN KINASE 4     | 4.87404 | 9.41E-06 |
| BC024575  | AMINOLEVULINIC ACID SYNTHASE 2, ERYTHROID | 5.05172 | 0.000813 |
